# Supplementary material for: Putative Epigenetic Biomarkers of Stress in Red Blood Cells of Chickens Reared Across Different Biomes
Source: PubMed Central journal article supplement (PMC7667380; doi:10.3389/fgene.2020.508809), 2020-11-02
Supplement: Presentation_1.pdf [file Presentation_1.pdf]

Supplementary Table S1. Sequencing and alignment statistics for the Brazilian White Leghorn lineage

| <b>Samples</b> | <b>Depth</b> | <b>bp<br/>Sequenced</b> | <b>Breadth (bp<br/>Sequenced/depth)</b> | <b>% of the <i>Gal.gal</i><br/>genome v.5.0</b> |
|----------------|--------------|-------------------------|-----------------------------------------|-------------------------------------------------|
| 7015_MeD1      | 31.7         | 295408723               | 9312189.4                               | 0.87                                            |
| 7016_MeD2      | 25.6         | 832172066               | 32458414.1                              | 3.02                                            |
| 7020_MeD1      | 25.2         | 189546154               | 7530578.0                               | 0.70                                            |
| 7021_MeD2      | 27.8         | 1003311203              | 36121385.0                              | 3.36                                            |
| 7022_MeD1      | 33.8         | 1225330777              | 36247027.9                              | 3.37                                            |
| 7023_MeD2      | 25.4         | 192182531               | 7554879.3                               | 0.70                                            |
| 7027_MeD1      | 32.6         | 1304734864              | 39971045.4                              | 3.72                                            |
| 7028_MeD2      | 29.6         | 393804620               | 13301603.7                              | 1.24                                            |
| 7032_MeD1      | 28.8         | 984802938               | 34171765.3                              | 3.18                                            |
| 7033_MeD2      | 30.5         | 459302304               | 15078966.5                              | 1.40                                            |
| 7034_MeD1      | 25.0         | 720493706               | 28793488.6                              | 2.68                                            |
| 7035_MeD2      | 29.0         | 441295599               | 15194193.5                              | 1.41                                            |
| 7037_MeD1      | 34.1         | 479456188               | 14069747.4                              | 1.31                                            |
| 7038_MeD2      | 28.5         | 575777754               | 20228777.2                              | 1.88                                            |
| 7041_MeD1      | 35.3         | 445276355               | 12625971.7                              | 1.17                                            |
| 7042_MeD2      | 31.2         | 470414147               | 15060771.0                              | 1.40                                            |
| 7046_MeD1      | 31.6         | 1191563338              | 37753937.2                              | 3.51                                            |
| 7047_MeD2      | 29.6         | 433131327               | 14610307.3                              | 1.36                                            |
| 7053_MeD1      | 33.9         | 462793117               | 13641975.8                              | 1.27                                            |
| 7054_MeD2      | 26.3         | 780340135               | 29679642.7                              | 2.76                                            |
| 7055_MeD1      | 29.2         | 368092791               | 12605097.3                              | 1.17                                            |
| 7056_MeD2      | 31.6         | 384803020               | 12183633.9                              | 1.13                                            |
| 7058_MeD1      | 23.1         | 634030676               | 27451969.0                              | 2.55                                            |
| 7059_MeD2      | 27.9         | 1024884425              | 36795402.6                              | 3.42                                            |
| 7060_MeD1      | 33.1         | 427452168               | 12922669.0                              | 1.20                                            |
| 7061_MeD2      | 32.6         | 430368078               | 13182307.9                              | 1.23                                            |
| 7069_MeD1      | 31.6         | 526618575               | 16650075.4                              | 1.55                                            |
| 7070_MeD2      | 34.1         | 493849470               | 14489867.8                              | 1.35                                            |
| 7078_MeD1      | 30.8         | 491468744               | 15978150.8                              | 1.49                                            |
| 7079_MeD2      | 32.3         | 553372862               | 17120148.9                              | 1.59                                            |
| 7080_MeD1      | 31.7         | 462173602               | 14600334.9                              | 1.36                                            |
| 7081_MeD2      | 32.4         | 436780887               | 13474029.8                              | 1.25                                            |
| 7015_input1    | 24.3         | 768825540               | 31633053.1                              | 2.94                                            |
| 7016_input2    | 26.7         | 928586824               | 34751070.3                              | 3.23                                            |
| 7020_input1    | 24.5         | 824291960               | 33598902.7                              | 3.13                                            |
| 7021_input2    | 22.0         | 777816462               | 35301378.9                              | 3.28                                            |
| 7022_input1    | 26.4         | 914468705               | 34669696.1                              | 3.23                                            |
| 7023_input2    | 25.2         | 844495123               | 33468812.7                              | 3.11                                            |
| 7027_input1    | 23.6         | 666364228               | 28274590.0                              | 2.63                                            |

|                     |      |             |            |      |
|---------------------|------|-------------|------------|------|
| 7028_input2         | 23.1 | 724726481   | 31338032.8 | 2.92 |
| 7032_input1         | 19.0 | 535820492   | 28134148.9 | 2.62 |
| 7033_input2         | 18.3 | 554995745   | 30405227.8 | 2.83 |
| 7034_input1         | 19.5 | 581623116   | 29859442.2 | 2.78 |
| 7035_input2         | 22.9 | 694511191   | 30283302.0 | 2.82 |
| 7037_input1         | 22.0 | 643137379   | 29246412.2 | 2.72 |
| 7038_input2         | 32.2 | 1279677373  | 39686933.0 | 3.69 |
| 7041_input1         | 22.4 | 680844300   | 30403793.1 | 2.83 |
| 7042_input2         | 20.8 | 659574765   | 31657056.2 | 2.94 |
| 7046_input1         | 20.7 | 691598186   | 33434930.1 | 3.11 |
| 7047_input2         | 22.1 | 760937592   | 34360822.4 | 3.20 |
| 7053_input1         | 19.3 | 488638882   | 25365653.8 | 2.36 |
| 7054_input2         | 20.4 | 587823560   | 28878441.3 | 2.69 |
| 7055_input1         | 19.2 | 535161417   | 27916464.5 | 2.60 |
| 7056_input2         | 21.1 | 715608621   | 33993721.1 | 3.16 |
| 7058_input1         | 33.7 | 1389053102  | 41215380.0 | 3.83 |
| 7059_input2         | 22.5 | 701101585   | 31178223.1 | 2.90 |
| 7060_input1         | 21.5 | 726590471   | 33771344.2 | 3.14 |
| 7061_input2         | 23.3 | 678911047   | 29189050.6 | 2.72 |
| 7069_input1         | 23.1 | 743286547   | 32217771.8 | 3.00 |
| 7070_input2         | 23.1 | 739180764   | 32011362.1 | 2.98 |
| 7078_input1         | 20.8 | 686583876   | 33069573.7 | 3.08 |
| 7079_input2         | 21.7 | 656157576   | 30249106.9 | 2.81 |
| 7080_input1         | 26.5 | 815248418   | 30744136.6 | 2.86 |
| 7081_input2         | 22.9 | 733997562   | 31999893.7 | 2.98 |
| <b>TotalAverage</b> | 25.8 | 662218637.7 | 26479622.2 | 2.46 |
| <b>TotalSD</b>      | 5.2  | 248211623   | 9150209    | 0.85 |
| <b>MeDIPAverage</b> | 30.2 | 597344785.8 | 20026886.1 | 1.86 |
| <b>MeDIPSD</b>      | 3.1  | 294204155.2 | 10085067.7 | 0.94 |
| <b>InputAverage</b> | 23.0 | 741551215   | 31947116.0 | 2.97 |
| <b>InputSD</b>      | 3.4  | 186608136   | 3230589.0  | 0.30 |

\*MeD means that individuals were subjected to GBS+MeDIP approach, and input means that individuals were subjected to GBS approach only. The numbers 1 and 2 represent control and isolated groups, respectively.

Supplementary Table S2. Sequencing and alignment statistics for the Swedish White Leghorn lineage

| <b>Samples</b>      | <b>Depth</b> | <b>bp Sequenced</b> | <b>Breadth (bp Sequenced/depth)</b> | <b>% of the <i>Gal.gal</i> genome v.5.0</b> |
|---------------------|--------------|---------------------|-------------------------------------|---------------------------------------------|
| 9103_MeD2           | 58.6574      | 217291466           | 3704416.9                           | 0.34                                        |
| 9104_MeD2           | 56.8586      | 228587592           | 4020281.8                           | 0.37                                        |
| 9105_MeD2           | 66.9302      | 291254510           | 4351615.7                           | 0.40                                        |
| 9109_MeD2           | 51.5768      | 386200724           | 7487876.8                           | 0.70                                        |
| 9116_MeD2           | 45.8561      | 197302675           | 4302648.4                           | 0.40                                        |
| 9117_MeD2           | 54.0269      | 438148433           | 8109820.0                           | 0.75                                        |
| 9118_MeD2           | 52.6391      | 192624836           | 3659349.0                           | 0.34                                        |
| 9120_MeD2           | 53.9478      | 260009946           | 4819658.0                           | 0.45                                        |
| 9130_MeD1           | 58.4201      | 270670524           | 4633174.6                           | 0.43                                        |
| 9132_MeD1           | 49.5792      | 282396940           | 5695875.3                           | 0.53                                        |
| 9134_MeD1           | 50.4113      | 626865258           | 12435014.7                          | 1.16                                        |
| 9136_MeD1           | 53.3895      | 207347664           | 3883678.7                           | 0.36                                        |
| 9148_MeD1           | 56.6508      | 423679222           | 7478786.2                           | 0.70                                        |
| 9154_MeD1           | 58.2284      | 326872583           | 5613628.1                           | 0.52                                        |
| <b>MEDIPAverage</b> | 54.8         | 310660883.8         | 5728273.2                           | 0.5                                         |
| <b>MEDIP SD</b>     | 5.1          | 121917627.9         | 2441239.6                           | 0.2                                         |

\*MeD means that individuals were subjected to GBS+MeDIP approach. The numbers 1 and 2 represent control and isolated groups, respectively

Supplementary Table S3. Comparison between the enrichment of CpG in genomic regions covered by the set of sequenced *reads* (seq - White Leghorn line of Brazil) and reference genome (genome)

|                    | seq / genome (n° of CpGs) | seq / genome (relH) | seq / genome (GoGe) | enrichment.score (relH) | enrichment.score (GoGe) | % of CpGs from <i>Gal.gal</i> genome v.6.0 |
|--------------------|---------------------------|---------------------|---------------------|-------------------------|-------------------------|--------------------------------------------|
| <b>Media Total</b> | 443891                    | 1.78                | 0.28                | 1.59                    | 1.07                    | <b>3.9</b>                                 |
| Media (Inp1)       | 528605                    | 1.68                | 0.27                | 1.50                    | 1.04                    | <b>4.6</b>                                 |
| Media (Inp2)       | 541815                    | 1.67                | 0.27                | 1.50                    | 1.04                    | <b>4.8</b>                                 |
| Media (Inp3)       | 510815                    | 1.69                | 0.27                | 1.51                    | 1.04                    | <b>4.5</b>                                 |
| Media (MeD1)       | 346586                    | 1.89                | 0.29                | 1.69                    | 1.11                    | <b>3.0</b>                                 |
| Media (MeD2)       | 320912                    | 1.92                | 0.29                | 1.72                    | 1.12                    | <b>2.8</b>                                 |

**Legend:** *relH* and *GoGe* show the relative frequency and the observed/expected CpG relation; enrichment.score.relH and enrichment.score.GoGe indicate the enrichment of CpGs within the regions sequenced in each experiment compared to a non-enriched reference genome, respectively

Supplementary Table S4. Comparison between the enrichment of CpG in genomic regions covered by the set of sequenced *reads* (seq - White Leghorn line of Sweden) and reference genome (genome)

|                    | seq / genome (n° of CpGs) | seq / genome (relH) | seq / genome (GoGe) | enrichment.score (relH) | enrichment.score (GoGe) | % of CpGs from <i>Gal.gal</i> genome v.6.0 |
|--------------------|---------------------------|---------------------|---------------------|-------------------------|-------------------------|--------------------------------------------|
| <b>Media Total</b> | 132206                    | 3.21                | 0.402               | 2.87                    | 1.53                    | <b>1.2</b>                                 |
| Media (MeD2)       | 112683                    | 3.24                | 0.404               | 2.90                    | 1.54                    | <b>1.0</b>                                 |
| Media (MeD1)       | 154997                    | 3.16                | 0.399               | 2.83                    | 1.52                    | <b>1.4</b>                                 |

**Legend:** *relH* and *GoGe* show the relative frequency and the observed/expected CpG relation; enrichment.score.relH and enrichment.score.GoGe indicate the enrichment of CpGs within the regions sequenced in each experiment compared to a non-enriched reference genome, respectively
