# Supplementary material for: Putative Epigenetic Biomarkers of Stress in Red Blood Cells of Chickens Reared Across Different Biomes
Source: Front Genet. 2020 Nov 2;11:508809. doi: 10.3389/fgene.2020.508809 (PMC7667380; doi:10.3389/fgene.2020.508809)
Supplement: Supplementary file 7 [file Data_Sheet_3.xlsx]

## Sheet: BR_pathways
PATHWAY		ENTITIES						REACTIONS				Submitted entities found	Mapped entities	Found reaction identifiers
Identifier	Name	Found		Total	Ratio	pValue	FDR	Found		Total	Ratio
R-GGA-426496	Post-transcriptional silencing by small RNAs	7	/	20	0.00167322	3.35906e-07	0.000104467	2	/	3	0.000478088	ENSGALG00000006068	A0A1D5PMS7;A0A1D5NWY7;A0A1D5P5G9;F1NAU7;A0A1D5NVT7;A0A1D5NX27;A0A1D5PQM8	R-GGA-426489;R-GGA-426522
R-GGA-3000157	Laminin interactions	6	/	42	0.00351376	0.000328328	0.0485182	5	/	6	0.000956175	ENSGALG00000006802	E1C700;A0A1D5PVM8;A0A1D5PMA9;A0A1D5P4L2;A0A1D5PGG9;A0A1D5NYS7	R-GGA-4084505;R-GGA-2426450;R-GGA-216048;R-GGA-3907292;R-GGA-216058
R-GGA-8874081	MET activates PTK2 signaling	6	/	45	0.00376475	0.00047105	0.0485182	1	/	5	0.000796813	ENSGALG00000006802	E1C700;A0A1D5PVM8;A0A1D5PMA9;A0A1D5P4L2;A0A1D5PGG9;A0A1D5NYS7	R-GGA-8874079
R-GGA-140180	COX reactions	2	/	2	0.000167322	0.000888326	0.0634429	2	/	2	0.000318725	ENSGALG00000001314	A0A1D5PM03;F1P3I2	R-GGA-140355;R-GGA-140359
R-GGA-6811555	PI5P Regulates TP53 Acetylation	3	/	9	0.000752949	0.00102327	0.0634429	1	/	4	0.00063745	ENSGALG00000004370	A0A1L1S0H7;A0A1D5PHN6;F1NVF2	R-GGA-8877691
R-GGA-211000	Gene Silencing by RNA	10	/	151	0.0126328	0.00175054	0.0836566	5	/	15	0.00239044	ENSGALG00000011652;ENSGALG00000006068	A0A1D5PMS7;A0A1L1RWL8;A0A1D5NWY7;A0A1D5P5G9;F1NAU7;A0A1D5NVT7;F1NT44;A0A1D5NX27;A0A1D5PQM8;A0A1D5PGM3	R-GGA-5578965;R-GGA-426489;R-GGA-9023909;R-GGA-426522;R-GGA-5578966
R-GGA-1369062	ABC transporters in lipid homeostasis	4	/	24	0.00200786	0.00190129	0.0836566	2	/	11	0.00175299	ENSGALG00000002453;ENSGALG00000004333	A0A1D5PI29;F1NWH0;A0A1D5P2Y4;E1BY40	R-GGA-382553;R-GGA-8848053
R-GGA-8875878	MET promotes cell motility	6	/	63	0.00527064	0.00258385	0.0981862	1	/	12	0.00191235	ENSGALG00000006802	E1C700;A0A1D5PVM8;A0A1D5PMA9;A0A1D5P4L2;A0A1D5PGG9;A0A1D5NYS7	R-GGA-8874079
R-GGA-1433557	Signaling by SCF-KIT	5	/	51	0.00426671	0.00515706	0.17534	4	/	30	0.00478088	ENSGALG00000031440;ENSGALG00000001828	A0A1D5P4W3;A0A1D5NXU4;F1NFS1;A0A1D5PI26;A0A1D5NWK0	R-GGA-1433423;R-GGA-205244;R-GGA-205319;R-GGA-1433506
R-GGA-426486	Small interfering RNA (siRNA) biogenesis	3	/	17	0.00142224	0.00608396	0.188603	1	/	5	0.000796813	ENSGALG00000011652	A0A1L1RWL8;F1NT44;A0A1D5PGM3	R-GGA-9023909
R-GGA-1433559	Regulation of KIT signaling	3	/	18	0.0015059	0.00711028	0.199088	3	/	6	0.000956175	ENSGALG00000001828	F1NFS1;A0A1D5PI26;A0A1D5NWK0	R-GGA-205244;R-GGA-205319;R-GGA-1433506
R-GGA-8937144	Aryl hydrocarbon receptor signalling	3	/	19	0.00158956	0.00823317	0.205829	3	/	5	0.000796813	ENSGALG00000040247	Q7T048;A0A1D5PII5;A0A1L1RZ33	R-GGA-8937169;R-GGA-8936849;R-GGA-8937191
R-GGA-6806834	Signaling by MET	7	/	108	0.00903539	0.00928488	0.213552	3	/	44	0.00701195	ENSGALG00000006045;ENSGALG00000006802	E1C700;A0A1D5PVM8;A0A1D5PMA9;A0A1D5P4L2;A0A1D5PGG9;A0A1D5NYS7;F1NB17	R-GGA-8875482;R-GGA-8874079;R-GGA-8875490
R-GGA-5685939	HDR through MMEJ (alt-NHEJ)	2	/	10	0.00083661	0.0198519	0.272732	6	/	6	0.000956175	ENSGALG00000006794	F1NEG1;A0A1D5P8T3	R-GGA-5687664;R-GGA-5687484;R-GGA-5687653;R-GGA-5687465;R-GGA-5687464;R-GGA-5687640
R-GGA-5693548	Sensing of DNA Double Strand Breaks	2	/	10	0.00083661	0.0198519	0.272732	6	/	8	0.0012749	ENSGALG00000006794	F1NEG1;A0A1D5P8T3	R-GGA-5682044;R-GGA-75172;R-GGA-3785768;R-GGA-75174;R-GGA-5693540;R-GGA-5693612
R-GGA-450302	activated TAK1 mediates p38 MAPK activation	3	/	28	0.00234251	0.0229218	0.272732	3	/	5	0.000796813	ENSGALG00000004370	A0A1L1S0H7;A0A1D5PHN6;F1NVF2	R-GGA-450333;R-GGA-450346;R-GGA-450296
R-GGA-5578749	Transcriptional regulation by small RNAs	7	/	132	0.0110433	0.0247939	0.272732	2	/	5	0.000796813	ENSGALG00000006068	A0A1D5PMS7;A0A1D5NWY7;A0A1D5P5G9;F1NAU7;A0A1D5NVT7;A0A1D5NX27;A0A1D5PQM8	R-GGA-5578965;R-GGA-5578966
R-GGA-71288	Creatine metabolism	2	/	12	0.00100393	0.0278032	0.297042	1	/	5	0.000796813	ENSGALG00000041419	A0A1D5P534;A0A1D5PU08	R-GGA-200396
R-GGA-190840	Microtubule-dependent trafficking of connexons from Golgi to the plasma membrane	3	/	31	0.00259349	0.0297042	0.297042	1	/	2	0.000318725	ENSGALG00000000433	F1NXR6;A0A1L1RJP8;A0A1L1RJ25	R-GGA-190520
R-GGA-190872	Transport of connexons to the plasma membrane	3	/	31	0.00259349	0.0297042	0.297042	1	/	2	0.000318725	ENSGALG00000000433	F1NXR6;A0A1L1RJP8;A0A1L1RJ25	R-GGA-190520
R-GGA-448706	Interleukin-1 processing	2	/	14	0.00117125	0.0368098	0.336854	2	/	5	0.000796813	ENSGALG00000029940	A0A1D5P4U4;O73909	R-GGA-448703;R-GGA-449058
R-GGA-2162123	Synthesis of Prostaglandins (PG) and Thromboxanes (TX)	2	/	14	0.00117125	0.0368098	0.336854	3	/	14	0.00223108	ENSGALG00000001314	A0A1D5PM03;F1P3I2	R-GGA-2314678;R-GGA-140355;R-GGA-140359
R-GGA-6804758	Regulation of TP53 Activity through Acetylation	3	/	34	0.00284447	0.0374282	0.336854	1	/	6	0.000956175	ENSGALG00000004370	A0A1L1S0H7;A0A1D5PHN6;F1NVF2	R-GGA-8877691
R-GGA-1855167	Synthesis of pyrophosphates in the cytosol	2	/	15	0.00125492	0.0416766	0.37509	2	/	15	0.00239044	ENSGALG00000008385	E1BXR8;A0A1D5P3Z0	R-GGA-1855182;R-GGA-1855216
R-GGA-168638	NOD1/2 Signaling Pathway	3	/	38	0.00317912	0.0491579	0.416618	2	/	8	0.0012749	ENSGALG00000004370	A0A1L1S0H7;A0A1D5PHN6;F1NVF2	R-GGA-727819;R-GGA-1247960
R-GGA-9006335	Signaling by Erythropoietin	2	/	17	0.00142224	0.0520772	0.416618	1	/	1	0.000159363	ENSGALG00000002583;ENSGALG00000026167	F1NHX1;F1NUD8	R-GGA-9021627
R-GGA-9027276	Erythropoietin activates Phosphoinositide-3-kinase (PI3K)	2	/	17	0.00142224	0.0520772	0.416618	1	/	1	0.000159363	ENSGALG00000002583;ENSGALG00000026167	F1NHX1;F1NUD8	R-GGA-9021627
R-GGA-8852276	The role of GTSE1 in G2/M progression after G2 checkpoint	3	/	39	0.00326278	0.0523391	0.418713	3	/	6	0.000956175	ENSGALG00000000433	F1NXR6;A0A1L1RJP8;A0A1L1RJ25	R-GGA-8852280;R-GGA-8852298;R-GGA-8852306
R-GGA-2022857	Keratan sulfate degradation	2	/	18	0.0015059	0.057588	0.437215	1	/	5	0.000796813	ENSGALG00000011328	F1NW93;A0A1D5PIW3	R-GGA-1630306
R-GGA-5626467	RHO GTPases activate IQGAPs	3	/	42	0.00351376	0.0624593	0.437215	1	/	4	0.00063745	ENSGALG00000000433	F1NXR6;A0A1L1RJP8;A0A1L1RJ25	R-GGA-5672329
R-GGA-190861	Gap junction assembly	3	/	46	0.00384841	0.0772428	0.522634	1	/	5	0.000796813	ENSGALG00000000433	F1NXR6;A0A1L1RJP8;A0A1L1RJ25	R-GGA-190520
R-GGA-2024096	HS-GAG degradation	2	/	49	0.00409939	0.28246	0.522634	1	/	14	0.00223108	ENSGALG00000011328	F1NW93;A0A1D5PIW3	R-GGA-2090079
R-GGA-1482839	Acyl chain remodelling of PE	2	/	22	0.00184054	0.0814497	0.522634	3	/	6	0.000956175	ENSGALG00000018977;ENSGALG00000012281	F1NBV7;E1C9K4	R-GGA-1482884;R-GGA-1602398;R-GGA-1482887
R-GGA-1660517	Synthesis of PIPs at the late endosome membrane	2	/	22	0.00184054	0.0814497	0.522634	1	/	4	0.00063745	ENSGALG00000002458	A0A1D5P566;F1NWG6	R-GGA-1676020
R-GGA-168643	Nucleotide-binding domain, leucine rich repeat containing receptor (NLR) signaling pathways	3	/	50	0.00418305	0.0934028	0.522634	2	/	12	0.00191235	ENSGALG00000004370	A0A1L1S0H7;A0A1D5PHN6;F1NVF2	R-GGA-727819;R-GGA-1247960
R-GGA-8955332	Carboxyterminal post-translational modifications of tubulin	3	/	51	0.00426671	0.0976444	0.522634	2	/	2	0.000318725	ENSGALG00000000433	F1NXR6;A0A1L1RJP8;A0A1L1RJ25	R-GGA-8867370;R-GGA-8865774
R-GGA-9020702	Interleukin-1 signaling	6	/	148	0.0123818	0.100709	0.522634	13	/	27	0.00430279	ENSGALG00000004370;ENSGALG00000007253;ENSGALG00000029940	E1C117;A0A1L1S0H7;A0A1D5P4U4;A0A1D5PHN6;F1NVF2;O73909	R-GGA-727819;R-GGA-446868;R-GGA-445753;R-GGA-445752;R-GGA-450133;R-GGA-446694;R-GGA-446862;R-GGA-446701;R-GGA-446684;R-GGA-507719;R-GGA-446130;R-GGA-446648;R-GGA-446634
R-GGA-1482788	Acyl chain remodelling of PC	2	/	25	0.00209153	0.10098	0.522634	3	/	7	0.00111554	ENSGALG00000018977;ENSGALG00000012281	F1NBV7;E1C9K4	R-GGA-1482816;R-GGA-1482856;R-GGA-1602417
R-GGA-8957275	Post-translational protein phosphorylation	6	/	149	0.0124655	0.103114	0.522634	1	/	1	0.000159363	ENSGALG00000006802	E1C700;A0A1D5PVM8;A0A1D5PMA9;A0A1D5P4L2;A0A1D5PGG9;A0A1D5NYS7	R-GGA-8952289
R-GGA-5173214	O-glycosylation of TSR domain-containing proteins	3	/	57	0.00476868	0.12464	0.522634	2	/	2	0.000318725	ENSGALG00000039219	F1NQ88;A0A1D5P4Q9;A0A1D5P958	R-GGA-5173005;R-GGA-5173192
R-GGA-446652	Interleukin-1 family signaling	6	/	160	0.0133858	0.131499	0.522634	15	/	42	0.00669323	ENSGALG00000004370;ENSGALG00000007253;ENSGALG00000029940	E1C117;A0A1L1S0H7;A0A1D5P4U4;A0A1D5PHN6;F1NVF2;O73909	R-GGA-727819;R-GGA-446868;R-GGA-445753;R-GGA-445752;R-GGA-450133;R-GGA-446694;R-GGA-449058;R-GGA-446862;R-GGA-446701;R-GGA-446684;R-GGA-448703;R-GGA-507719;R-GGA-446130;R-GGA-446648;R-GGA-446634
R-GGA-6811436	COPI-independent Golgi-to-ER retrograde traffic	4	/	91	0.00761315	0.133079	0.522634	3	/	7	0.00111554	ENSGALG00000000433;ENSGALG00000012281	F1NXR6;A0A1L1RJP8;F1NBV7;A0A1L1RJ25	R-GGA-8849353;R-GGA-8849350;R-GGA-8848484
R-GGA-2559580	Oxidative Stress Induced Senescence	3	/	60	0.00501966	0.139043	0.522634	4	/	17	0.00270916	ENSGALG00000004370	A0A1L1S0H7;A0A1D5PHN6;F1NVF2	R-GGA-3228469;R-GGA-450333;R-GGA-450296;R-GGA-3238999
R-GGA-1483226	Synthesis of PI	1	/	7	0.000585627	0.139261	0.522634	1	/	2	0.000318725	ENSGALG00000034939	A0A1D5P6B2	R-GGA-8869241
R-GGA-1660516	Synthesis of PIPs at the early endosome membrane	2	/	31	0.00259349	0.14322	0.522634	1	/	11	0.00175299	ENSGALG00000002458	A0A1D5P566;F1NWG6	R-GGA-1676174
R-GGA-381426	Regulation of Insulin-like Growth Factor (IGF) transport and uptake by Insulin-like Growth Factor Binding Proteins (IGFBPs)	6	/	165	0.0138041	0.14552	0.522634	1	/	13	0.00207171	ENSGALG00000006802	E1C700;A0A1D5PVM8;A0A1D5PMA9;A0A1D5P4L2;A0A1D5PGG9;A0A1D5NYS7	R-GGA-8952289
R-GGA-1655829	Regulation of cholesterol biosynthesis by SREBP (SREBF)	1	/	9	0.000752949	0.175376	0.522634	6	/	6	0.000956175	ENSGALG00000041687	A0A1D5PX69	R-GGA-1655842;R-GGA-1655851;R-GGA-2065550;R-GGA-2065549;R-GGA-1655831;R-GGA-2065539
R-GGA-2559586	DNA Damage/Telomere Stress Induced Senescence	2	/	36	0.0030118	0.180707	0.522634	8	/	12	0.00191235	ENSGALG00000006794	F1NEG1;A0A1D5P8T3	R-GGA-5682044;R-GGA-3785768;R-GGA-5682018;R-GGA-6792712;R-GGA-5682020;R-GGA-5682026;R-GGA-5693540;R-GGA-5693612
R-GGA-192105	Synthesis of bile acids and bile salts	1	/	55	0.00460136	0.692926	0.692926	1	/	53	0.00844622	ENSGALG00000032149	A0A1D5P2S4	R-GGA-8867667
R-GGA-1660514	Synthesis of PIPs at the Golgi membrane	2	/	39	0.00326278	0.203841	0.522634	1	/	10	0.00159363	ENSGALG00000002458	A0A1D5P566;F1NWG6	R-GGA-1676005
R-GGA-2559583	Cellular Senescence	5	/	146	0.0122145	0.205552	0.522634	12	/	37	0.00589641	ENSGALG00000004370;ENSGALG00000006794	A0A1L1S0H7;A0A1D5PHN6;F1NVF2;F1NEG1;A0A1D5P8T3	R-GGA-5682044;R-GGA-3785768;R-GGA-3228469;R-GGA-450333;R-GGA-5682018;R-GGA-6792712;R-GGA-5682020;R-GGA-450296;R-GGA-3238999;R-GGA-5682026;R-GGA-5693540;R-GGA-5693612
R-GGA-190828	Gap junction trafficking	3	/	73	0.00610725	0.206899	0.522634	1	/	9	0.00143426	ENSGALG00000000433	F1NXR6;A0A1L1RJP8;A0A1L1RJ25	R-GGA-190520
R-GGA-2168880	Scavenging of heme from plasma	1	/	11	0.000920271	0.209981	0.522634	5	/	8	0.0012749	ENSGALG00000022586	H9L385	R-GGA-2168897;R-GGA-2168884;R-GGA-2230983;R-GGA-2168887;R-GGA-2168886
R-GGA-157858	Gap junction trafficking and regulation	3	/	79	0.00660922	0.240385	0.522634	1	/	12	0.00191235	ENSGALG00000000433	F1NXR6;A0A1L1RJP8;A0A1L1RJ25	R-GGA-190520
R-GGA-390666	Serotonin receptors	1	/	13	0.00108759	0.243139	0.522634	1	/	3	0.000478088	ENSGALG00000001383	F1NJL4	R-GGA-390931
R-GGA-1638074	Keratan sulfate/keratin metabolism	2	/	45	0.00376475	0.250892	0.522634	1	/	13	0.00207171	ENSGALG00000011328	F1NW93;A0A1D5PIW3	R-GGA-1630306
R-GGA-5693554	Resolution of D-loop Structures through Synthesis-Dependent Strand Annealing (SDSA)	2	/	46	0.00384841	0.258783	0.522634	1	/	1	0.000159363	ENSGALG00000006794	F1NEG1;A0A1D5P8T3	R-GGA-5693589
R-GGA-450294	MAP kinase activation	3	/	83	0.00694386	0.263188	0.522634	3	/	27	0.00430279	ENSGALG00000004370	A0A1L1S0H7;A0A1D5PHN6;F1NVF2	R-GGA-450333;R-GGA-450346;R-GGA-450296
R-GGA-194068	Bile acid and bile salt metabolism	1	/	64	0.0053543	0.747005	0.747005	1	/	63	0.0100398	ENSGALG00000032149	A0A1D5P2S4	R-GGA-8867667
R-GGA-5693568	Resolution of D-loop Structures through Holliday Junction Intermediates	2	/	48	0.00401573	0.27457	0.522634	4	/	5	0.000796813	ENSGALG00000006794	F1NEG1;A0A1D5P8T3	R-GGA-5686469;R-GGA-5693539;R-GGA-5693584;R-GGA-5686483
R-GGA-1482922	Acyl chain remodelling of PI	1	/	15	0.00125492	0.27491	0.522634	2	/	6	0.000956175	ENSGALG00000018977	E1C9K4	R-GGA-1482868;R-GGA-1602377
R-GGA-432722	Golgi Associated Vesicle Biogenesis	2	/	71	0.00593993	0.449568	0.522634	2	/	3	0.000478088	ENSGALG00000011621	A0A1D5P7X1;F1NVD2	R-GGA-421831;R-GGA-421835
R-GGA-448424	Interleukin-17 signaling	3	/	87	0.00727851	0.286246	0.522634	3	/	28	0.00446215	ENSGALG00000004370	A0A1L1S0H7;A0A1D5PHN6;F1NVF2	R-GGA-450333;R-GGA-450346;R-GGA-450296
R-GGA-5633007	Regulation of TP53 Activity	3	/	87	0.00727851	0.286246	0.522634	1	/	27	0.00430279	ENSGALG00000004370	A0A1L1S0H7;A0A1D5PHN6;F1NVF2	R-GGA-8877691
R-GGA-5693537	Resolution of D-Loop Structures	2	/	51	0.00426671	0.298214	0.522634	5	/	6	0.000956175	ENSGALG00000006794	F1NEG1;A0A1D5P8T3	R-GGA-5686469;R-GGA-5693589;R-GGA-5693539;R-GGA-5693584;R-GGA-5686483
R-GGA-1483255	PI Metabolism	4	/	129	0.0107923	0.299514	0.522634	5	/	67	0.0106773	ENSGALG00000002458;ENSGALG00000002583;ENSGALG00000026167	F1NHX1;A0A1D5P566;F1NWG6;F1NUD8	R-GGA-1676109;R-GGA-1676005;R-GGA-1676020;R-GGA-1676174;R-GGA-1676048
R-GGA-4641265	Repression of WNT target genes	1	/	17	0.00142224	0.305353	0.522634	1	/	3	0.000478088	ENSGALG00000039942	Q5ZIZ6	R-GGA-5334050
R-GGA-1482925	Acyl chain remodelling of PG	1	/	17	0.00142224	0.305353	0.522634	2	/	10	0.00159363	ENSGALG00000018977	E1C9K4	R-GGA-1482907;R-GGA-1602368
R-GGA-69473	G2/M DNA damage checkpoint	2	/	52	0.00435037	0.306072	0.522634	2	/	5	0.000796813	ENSGALG00000006794	F1NEG1;A0A1D5P8T3	R-GGA-5683735;R-GGA-69891
R-GGA-168164	Toll Like Receptor 3 (TLR3) Cascade	3	/	92	0.00769681	0.315276	0.522634	3	/	30	0.00478088	ENSGALG00000004370	A0A1L1S0H7;A0A1D5PHN6;F1NVF2	R-GGA-450333;R-GGA-450346;R-GGA-450296
R-GGA-168176	Toll Like Receptor 5 (TLR5) Cascade	3	/	92	0.00769681	0.315276	0.522634	3	/	34	0.00541833	ENSGALG00000004370	A0A1L1S0H7;A0A1D5PHN6;F1NVF2	R-GGA-450333;R-GGA-450346;R-GGA-450296
R-GGA-975871	MyD88 cascade initiated on plasma membrane	3	/	92	0.00769681	0.315276	0.522634	3	/	34	0.00541833	ENSGALG00000004370	A0A1L1S0H7;A0A1D5PHN6;F1NVF2	R-GGA-450333;R-GGA-450346;R-GGA-450296
R-GGA-450604	KSRP (KHSRP) binds and destabilizes mRNA	1	/	18	0.0015059	0.320094	0.522634	1	/	3	0.000478088	ENSGALG00000039917	A0A1D5PLG0	R-GGA-450422
R-GGA-166058	MyD88:MAL(TIRAP) cascade initiated on plasma membrane	3	/	93	0.00778047	0.321094	0.522634	3	/	35	0.00557769	ENSGALG00000004370	A0A1L1S0H7;A0A1D5PHN6;F1NVF2	R-GGA-450333;R-GGA-450346;R-GGA-450296
R-GGA-181438	Toll Like Receptor 2 (TLR2) Cascade	3	/	93	0.00778047	0.321094	0.522634	3	/	35	0.00557769	ENSGALG00000004370	A0A1L1S0H7;A0A1D5PHN6;F1NVF2	R-GGA-450333;R-GGA-450346;R-GGA-450296
R-GGA-168188	Toll Like Receptor TLR6:TLR2 Cascade	3	/	93	0.00778047	0.321094	0.522634	3	/	35	0.00557769	ENSGALG00000004370	A0A1L1S0H7;A0A1D5PHN6;F1NVF2	R-GGA-450333;R-GGA-450346;R-GGA-450296
R-GGA-168179	Toll Like Receptor TLR1:TLR2 Cascade	3	/	93	0.00778047	0.321094	0.522634	3	/	35	0.00557769	ENSGALG00000004370	A0A1L1S0H7;A0A1D5PHN6;F1NVF2	R-GGA-450333;R-GGA-450346;R-GGA-450296
R-GGA-168142	Toll Like Receptor 10 (TLR10) Cascade	3	/	94	0.00786413	0.326914	0.522634	3	/	35	0.00557769	ENSGALG00000004370	A0A1L1S0H7;A0A1D5PHN6;F1NVF2	R-GGA-450333;R-GGA-450346;R-GGA-450296
R-GGA-2129379	Molecules associated with elastic fibres	2	/	55	0.00460136	0.329536	0.522634	3	/	8	0.0012749	ENSGALG00000037625	A0A1D5NXE0;A0A1D5NW86	R-GGA-1592387;R-GGA-2161282;R-GGA-2396399
R-GGA-5620924	Intraflagellar transport	3	/	95	0.0079478	0.332734	0.522634	6	/	8	0.0012749	ENSGALG00000000433	F1NXR6;A0A1L1RJP8;A0A1L1RJ25	R-GGA-5624952;R-GGA-5625421;R-GGA-5624949;R-GGA-5625416;R-GGA-5625426;R-GGA-5625424
R-GGA-5685938	HDR through Single Strand Annealing (SSA)	2	/	56	0.00468502	0.337312	0.522634	3	/	5	0.000796813	ENSGALG00000006794	F1NEG1;A0A1D5P8T3	R-GGA-5693564;R-GGA-5686642;R-GGA-5693580
R-GGA-6811440	Retrograde transport at the Trans-Golgi-Network	2	/	56	0.00468502	0.337312	0.522634	3	/	15	0.00239044	ENSGALG00000011621	A0A1D5P7X1;F1NVD2	R-GGA-6814675;R-GGA-6814671;R-GGA-6814670
R-GGA-1483257	Phospholipid metabolism	7	/	265	0.0221702	0.341152	0.522634	20	/	164	0.0261355	ENSGALG00000002458;ENSGALG00000002583;ENSGALG00000026167;ENSGALG00000018977;ENSGALG00000034939;ENSGALG00000012281	F1NHX1;A0A1D5P566;A0A1D5P6B2;F1NWG6;F1NBV7;E1C9K4;F1NUD8	R-GGA-1482907;R-GGA-1676005;R-GGA-1602374;R-GGA-1676048;R-GGA-1602368;R-GGA-1482887;R-GGA-1482816;R-GGA-1676109;R-GGA-1482679;R-GGA-1482884;R-GGA-1676020;R-GGA-8869241;R-GGA-1676174;R-GGA-1482868;R-GGA-1482776;R-GGA-1602398;R-GGA-1602377;R-GGA-1482856;R-GGA-1602446;R-GGA-1602417
R-GGA-975138	TRAF6 mediated induction of NFkB and MAP kinases upon TLR7/8 or 9 activation	3	/	97	0.00811512	0.344366	0.522634	3	/	34	0.00541833	ENSGALG00000004370	A0A1L1S0H7;A0A1D5PHN6;F1NVF2	R-GGA-450333;R-GGA-450346;R-GGA-450296
R-GGA-450385	Butyrate Response Factor 1 (BRF1) binds and destabilizes mRNA	1	/	20	0.00167322	0.348647	0.522634	1	/	5	0.000796813	ENSGALG00000039917	A0A1D5PLG0	R-GGA-450488
R-GGA-983695	Antigen activates B Cell Receptor (BCR) leading to generation of second messengers	1	/	20	0.00167322	0.348647	0.522634	1	/	6	0.000956175	ENSGALG00000002583	F1NHX1	R-GGA-2045911
R-GGA-8948751	Regulation of PTEN stability and activity	3	/	98	0.00819878	0.350177	0.522634	1	/	9	0.00143426	ENSGALG00000000699	A0A1D5P8K6;E1C3L4;A0A1D5PAN8	R-GGA-6807134
R-GGA-975155	MyD88 dependent cascade initiated on endosome	3	/	99	0.00828244	0.355982	0.522634	3	/	48	0.0076494	ENSGALG00000004370	A0A1L1S0H7;A0A1D5PHN6;F1NVF2	R-GGA-450333;R-GGA-450346;R-GGA-450296
R-GGA-168138	Toll Like Receptor 9 (TLR9) Cascade	3	/	99	0.00828244	0.355982	0.522634	3	/	48	0.0076494	ENSGALG00000004370	A0A1L1S0H7;A0A1D5PHN6;F1NVF2	R-GGA-450333;R-GGA-450346;R-GGA-450296
R-GGA-168181	Toll Like Receptor 7/8 (TLR7/8) Cascade	3	/	99	0.00828244	0.355982	0.522634	3	/	49	0.00780876	ENSGALG00000004370	A0A1L1S0H7;A0A1D5PHN6;F1NVF2	R-GGA-450333;R-GGA-450346;R-GGA-450296
R-GGA-983189	Kinesins	3	/	102	0.00853342	0.373354	0.522634	2	/	9	0.00143426	ENSGALG00000000433	F1NXR6;A0A1L1RJP8;A0A1L1RJ25	R-GGA-983266;R-GGA-983259
R-GGA-5140745	WNT5A-dependent internalization of FZD2, FZD5 and ROR2	1	/	22	0.00184054	0.376005	0.522634	2	/	2	0.000318725	ENSGALG00000030847	A0A1D5PEC1	R-GGA-5140741;R-GGA-5140747
R-GGA-1482801	Acyl chain remodelling of PS	1	/	22	0.00184054	0.376005	0.522634	2	/	8	0.0012749	ENSGALG00000018977	E1C9K4	R-GGA-1602374;R-GGA-1482776
R-GGA-420499	Class C/3 (Metabotropic glutamate/pheromone receptors)	1	/	22	0.00184054	0.376005	0.522634	1	/	5	0.000796813	ENSGALG00000003839	E1C8F2	R-GGA-373075
R-GGA-5693571	Nonhomologous End-Joining (NHEJ)	2	/	62	0.00518698	0.383317	0.522634	3	/	11	0.00175299	ENSGALG00000006794	F1NEG1;A0A1D5P8T3	R-GGA-5686704;R-GGA-5686900;R-GGA-5686685
R-GGA-1660662	Glycosphingolipid metabolism	2	/	62	0.00518698	0.383317	0.522634	2	/	28	0.00446215	ENSGALG00000011328	F1NW93;A0A1D5PIW3	R-GGA-1605624;R-GGA-1606312
R-GGA-1483249	Inositol phosphate metabolism	2	/	64	0.0053543	0.398357	0.522634	2	/	49	0.00780876	ENSGALG00000008385	E1BXR8;A0A1D5P3Z0	R-GGA-1855182;R-GGA-1855216
R-GGA-421837	Clathrin derived vesicle budding	2	/	95	0.0079478	0.604386	0.604386	2	/	9	0.00143426	ENSGALG00000011621	A0A1D5P7X1;F1NVD2	R-GGA-421831;R-GGA-421835
R-GGA-912631	Regulation of signaling by CBL	1	/	24	0.00200786	0.402218	0.522634	2	/	4	0.00063745	ENSGALG00000002583	F1NHX1	R-GGA-912627;R-GGA-879917
R-GGA-6803157	Antimicrobial peptides	1	/	24	0.00200786	0.402218	0.522634	1	/	13	0.00207171	ENSGALG00000018977	E1C9K4	R-GGA-8862771
R-GGA-5693616	Presynaptic phase of homologous DNA pairing and strand exchange	2	/	65	0.00543797	0.405813	0.522634	2	/	5	0.000796813	ENSGALG00000006794	F1NEG1;A0A1D5P8T3	R-GGA-5685341;R-GGA-5693561
R-GGA-382556	ABC-family proteins mediated transport	4	/	154	0.0128838	0.419701	0.522634	2	/	27	0.00430279	ENSGALG00000002453;ENSGALG00000004333	A0A1D5PI29;F1NWH0;A0A1D5P2Y4;E1BY40	R-GGA-382553;R-GGA-8848053
R-GGA-1566948	Elastic fibre formation	2	/	67	0.00560529	0.420591	0.522634	8	/	15	0.00239044	ENSGALG00000037625	A0A1D5NXE0;A0A1D5NW86	R-GGA-2129385;R-GGA-1592387;R-GGA-2161282;R-GGA-2129353;R-GGA-2129375;R-GGA-2396399;R-GGA-2129362;R-GGA-2129357
R-GGA-156584	Cytosolic sulfonation of small molecules	1	/	26	0.00217519	0.427335	0.522634	1	/	17	0.00270916	ENSGALG00000005626	F1NGS3	R-GGA-8954262
R-GGA-73817	Purine ribonucleoside monophosphate biosynthesis	1	/	26	0.00217519	0.427335	0.522634	1	/	17	0.00270916	ENSGALG00000030925	A0A1D5PR69	R-GGA-6788912
R-GGA-5693607	Processing of DNA double-strand break ends	2	/	69	0.00577261	0.435179	0.522634	13	/	14	0.00223108	ENSGALG00000006794	F1NEG1;A0A1D5P8T3	R-GGA-5684875;R-GGA-5684081;R-GGA-5693542;R-GGA-5693608;R-GGA-5685011;R-GGA-5685994;R-GGA-5684108;R-GGA-5684887;R-GGA-5685985;R-GGA-5685156;R-GGA-5684140;R-GGA-5684096;R-GGA-5684882
R-GGA-5576892	Phase 0 - rapid depolarisation	1	/	27	0.00225885	0.439496	0.522634	1	/	1	0.000159363	ENSGALG00000036964	A0A1D5P193	R-GGA-5577213
R-GGA-392451	G beta:gamma signalling through PI3Kgamma	1	/	27	0.00225885	0.439496	0.522634	2	/	3	0.000478088	ENSGALG00000026167	F1NUD8	R-GGA-392295;R-GGA-392300
R-GGA-429958	mRNA decay by 3' to 5' exoribonuclease	1	/	27	0.00225885	0.439496	0.522634	1	/	3	0.000478088	ENSGALG00000039917	A0A1D5PLG0	R-GGA-430028
R-GGA-2029485	Role of phospholipids in phagocytosis	1	/	27	0.00225885	0.439496	0.522634	1	/	8	0.0012749	ENSGALG00000012281	F1NBV7	R-GGA-2029475
R-GGA-199992	trans-Golgi Network Vesicle Budding	2	/	95	0.0079478	0.604386	0.604386	2	/	9	0.00143426	ENSGALG00000011621	A0A1D5P7X1;F1NVD2	R-GGA-421831;R-GGA-421835
R-GGA-5693579	Homologous DNA Pairing and Strand Exchange	2	/	71	0.00593993	0.449568	0.522634	4	/	8	0.0012749	ENSGALG00000006794	F1NEG1;A0A1D5P8T3	R-GGA-5685341;R-GGA-5693620;R-GGA-5693561;R-GGA-5685838
R-GGA-1638091	Heparan sulfate/heparin (HS-GAG) metabolism	2	/	98	0.00819878	0.621263	0.621263	1	/	29	0.00462151	ENSGALG00000011328	F1NW93;A0A1D5PIW3	R-GGA-2090079
R-GGA-3371497	HSP90 chaperone cycle for steroid hormone receptors (SHR)	3	/	107	0.00895173	0.402091	0.522634	1	/	12	0.00191235	ENSGALG00000000433	F1NXR6;A0A1L1RJP8;A0A1L1RJ25	R-GGA-5618080
R-GGA-6807004	Negative regulation of MET activity	1	/	29	0.00242617	0.463052	0.522634	2	/	9	0.00143426	ENSGALG00000006045	F1NB17	R-GGA-8875482;R-GGA-8875490
R-GGA-114604	GPVI-mediated activation cascade	1	/	29	0.00242617	0.463052	0.522634	1	/	8	0.0012749	ENSGALG00000026167	F1NUD8	R-GGA-437162
R-GGA-2142753	Arachidonic acid metabolism	2	/	73	0.00610725	0.463749	0.522634	3	/	42	0.00669323	ENSGALG00000001314	A0A1D5PM03;F1P3I2	R-GGA-2314678;R-GGA-140355;R-GGA-140359
R-GGA-1660499	Synthesis of PIPs at the plasma membrane	2	/	74	0.00619091	0.470759	0.522634	2	/	28	0.00446215	ENSGALG00000002583;ENSGALG00000026167	F1NHX1;F1NUD8	R-GGA-1676109;R-GGA-1676048
R-GGA-397795	G-protein beta:gamma signalling	1	/	30	0.00250983	0.474457	0.522634	2	/	5	0.000796813	ENSGALG00000026167	F1NUD8	R-GGA-392295;R-GGA-392300
R-GGA-3899300	SUMOylation of transcription cofactors	1	/	30	0.00250983	0.474457	0.522634	1	/	3	0.000478088	ENSGALG00000039942	Q5ZIZ6	R-GGA-3108203
R-GGA-6809371	Formation of the cornified envelope	2	/	75	0.00627458	0.477714	0.522634	3	/	11	0.00175299	ENSGALG00000002201	A0A1D5PTH5;F1NV96	R-GGA-6814187;R-GGA-6810843;R-GGA-6814374
R-GGA-6805567	Keratinization	2	/	75	0.00627458	0.477714	0.522634	3	/	17	0.00270916	ENSGALG00000002201	A0A1D5PTH5;F1NV96	R-GGA-6814187;R-GGA-6810843;R-GGA-6814374
R-GGA-8956320	Nucleobase biosynthesis	1	/	31	0.00259349	0.485622	0.522634	1	/	23	0.00366534	ENSGALG00000030925	A0A1D5PR69	R-GGA-6788912
R-GGA-380284	Loss of proteins required for interphase microtubule organizationÂ from the centrosome	3	/	123	0.0102903	0.490968	0.522634	3	/	3	0.000478088	ENSGALG00000000433	F1NXR6;A0A1L1RJP8;A0A1L1RJ25	R-GGA-380294;R-GGA-380272;R-GGA-380303
R-GGA-380259	Loss of Nlp from mitotic centrosomes	3	/	123	0.0102903	0.490968	0.522634	2	/	2	0.000318725	ENSGALG00000000433	F1NXR6;A0A1L1RJP8;A0A1L1RJ25	R-GGA-380272;R-GGA-380303
R-GGA-937061	TRIF(TICAM1)-mediated TLR4 signaling	3	/	124	0.010374	0.496318	0.522634	3	/	46	0.00733068	ENSGALG00000004370	A0A1L1S0H7;A0A1D5PHN6;F1NVF2	R-GGA-450333;R-GGA-450346;R-GGA-450296
R-GGA-166166	MyD88-independent TLR4 cascade	3	/	124	0.010374	0.496318	0.522634	3	/	48	0.0076494	ENSGALG00000004370	A0A1L1S0H7;A0A1D5PHN6;F1NVF2	R-GGA-450333;R-GGA-450346;R-GGA-450296
R-GGA-2173782	Binding and Uptake of Ligands by Scavenger Receptors	1	/	32	0.00267715	0.49655	0.522634	5	/	16	0.0025498	ENSGALG00000022586	H9L385	R-GGA-2168897;R-GGA-2168884;R-GGA-2230983;R-GGA-2168887;R-GGA-2168886
R-GGA-5693565	Recruitment and ATM-mediated phosphorylation of repair and signaling proteins at DNA double strand breaks	2	/	79	0.00660922	0.504968	0.522634	27	/	32	0.0050996	ENSGALG00000006794	F1NEG1;A0A1D5P8T3	R-GGA-69891;R-GGA-5683801;R-GGA-5693583;R-GGA-5683735;R-GGA-5683385;R-GGA-5683425;R-GGA-5683986;R-GGA-5693549;R-GGA-5683384;R-GGA-5693566;R-GGA-5683077;R-GGA-5693551;R-GGA-5682992;R-GGA-5683964;R-GGA-5693602;R-GGA-5682983;R-GGA-5693536;R-GGA-5682598;R-GGA-5693598;R-GGA-5682967;R-GGA-5683967;R-GGA-5682629;R-GGA-5682965;R-GGA-5682588;R-GGA-5682586;R-GGA-5682863;R-GGA-5682858
R-GGA-351202	Metabolism of polyamines	3	/	126	0.0105413	0.506932	0.522634	2	/	31	0.00494024	ENSGALG00000023437;ENSGALG00000041419	A0A1D5P534;A0A1D5PU08;E1BYW3	R-GGA-350578;R-GGA-200396
R-GGA-400206	Regulation of lipid metabolism by Peroxisome proliferator-activated receptor alpha (PPARalpha)	1	/	33	0.00276081	0.507246	0.522634	2	/	3	0.000478088	ENSGALG00000003120	E1C3T2	R-GGA-400183;R-GGA-400143
R-GGA-5576893	Phase 2 - plateau phase	1	/	34	0.00284447	0.517716	0.522634	1	/	2	0.000318725	ENSGALG00000036964	A0A1D5P193	R-GGA-5577213
R-GGA-1650814	Collagen biosynthesis and modifying enzymes	3	/	117	0.00978834	0.458315	0.522634	1	/	43	0.00685259	ENSGALG00000039219	F1NQ88;A0A1D5P4Q9;A0A1D5P958	R-GGA-2002428
R-GGA-5693606	DNA Double Strand Break Response	2	/	82	0.0068602	0.524798	0.524798	33	/	40	0.0063745	ENSGALG00000006794	F1NEG1;A0A1D5P8T3	R-GGA-69891;R-GGA-5683801;R-GGA-5693583;R-GGA-5683735;R-GGA-5683385;R-GGA-5683425;R-GGA-5683986;R-GGA-5693549;R-GGA-5683384;R-GGA-5693566;R-GGA-5683077;R-GGA-5693551;R-GGA-5682992;R-GGA-5683964;R-GGA-5693602;R-GGA-5682983;R-GGA-5693536;R-GGA-5682598;R-GGA-5693598;R-GGA-75174;R-GGA-5682967;R-GGA-5693540;R-GGA-5693612;R-GGA-5683967;R-GGA-5682629;R-GGA-5682044;R-GGA-75172;R-GGA-3785768;R-GGA-5682965…
R-GGA-5173105	O-linked glycosylation	3	/	129	0.0107923	0.522634	0.522634	2	/	24	0.0038247	ENSGALG00000039219	F1NQ88;A0A1D5P4Q9;A0A1D5P958	R-GGA-5173005;R-GGA-5173192
R-GGA-8854518	AURKA Activation by TPX2	3	/	130	0.0108759	0.527808	0.527808	2	/	2	0.000318725	ENSGALG00000000433	F1NXR6;A0A1L1RJP8;A0A1L1RJ25	R-GGA-8853419;R-GGA-8853405
R-GGA-182971	EGFR downregulation	1	/	35	0.00292814	0.527965	0.527965	7	/	20	0.00318725	ENSGALG00000006045	F1NB17	R-GGA-8867047;R-GGA-182990;R-GGA-182986;R-GGA-183002;R-GGA-182994;R-GGA-8867041;R-GGA-8951490
R-GGA-3238698	WNT ligand biogenesis and trafficking	1	/	36	0.0030118	0.537997	0.537997	6	/	10	0.00159363	ENSGALG00000034196	A0A1D5NX70	R-GGA-3247837;R-GGA-3247840;R-GGA-3781941;R-GGA-3247844;R-GGA-3247843;R-GGA-3781943
R-GGA-380287	Centrosome maturation	3	/	140	0.0117125	0.577773	0.577773	6	/	6	0.000956175	ENSGALG00000000433	F1NXR6;A0A1L1RJP8;A0A1L1RJ25	R-GGA-380294;R-GGA-380283;R-GGA-380455;R-GGA-380272;R-GGA-380303;R-GGA-380311
R-GGA-380270	Recruitment of mitotic centrosome proteins and complexes	3	/	140	0.0117125	0.577773	0.577773	3	/	3	0.000478088	ENSGALG00000000433	F1NXR6;A0A1L1RJP8;A0A1L1RJ25	R-GGA-380283;R-GGA-380455;R-GGA-380311
R-GGA-1483206	Glycerophospholipid biosynthesis	3	/	140	0.0117125	0.577773	0.577773	15	/	101	0.0160956	ENSGALG00000018977;ENSGALG00000034939;ENSGALG00000012281	A0A1D5P6B2;F1NBV7;E1C9K4	R-GGA-1482907;R-GGA-1602374;R-GGA-1602368;R-GGA-1482887;R-GGA-1482816;R-GGA-1482679;R-GGA-1482884;R-GGA-8869241;R-GGA-1482868;R-GGA-1482776;R-GGA-1602398;R-GGA-1602377;R-GGA-1482856;R-GGA-1602446;R-GGA-1602417
R-GGA-2029480	Fcgamma receptor (FCGR) dependent phagocytosis	1	/	131	0.0109596	0.940462	0.940462	1	/	30	0.00478088	ENSGALG00000012281	F1NBV7	R-GGA-2029475
R-GGA-166016	Toll Like Receptor 4 (TLR4) Cascade	3	/	143	0.0119635	0.592104	0.592104	3	/	61	0.00972112	ENSGALG00000004370	A0A1L1S0H7;A0A1D5PHN6;F1NVF2	R-GGA-450333;R-GGA-450346;R-GGA-450296
R-GGA-4641262	Disassembly of the destruction complex and recruitment of AXIN to the membrane	1	/	42	0.00351376	0.59388	0.59388	3	/	4	0.00063745	ENSGALG00000030847	A0A1D5PEC1	R-GGA-201685;R-GGA-1504186;R-GGA-201677
R-GGA-512988	Interleukin-3, Interleukin-5 and GM-CSF signaling	1	/	42	0.00351376	0.59388	0.59388	3	/	19	0.00302789	ENSGALG00000002583	F1NHX1	R-GGA-914182;R-GGA-912627;R-GGA-879917
R-GGA-388844	Receptor-type tyrosine-protein phosphatases	1	/	43	0.00359742	0.602516	0.602516	1	/	5	0.000796813	ENSGALG00000007253	E1C117	R-GGA-6800380
R-GGA-1483166	Synthesis of PA	1	/	43	0.00359742	0.602516	0.602516	2	/	16	0.0025498	ENSGALG00000018977	E1C9K4	R-GGA-1482679;R-GGA-1602446
R-GGA-1474290	Collagen formation	3	/	141	0.0117962	0.582585	0.582585	1	/	66	0.0105179	ENSGALG00000039219	F1NQ88;A0A1D5P4Q9;A0A1D5P958	R-GGA-2002428
R-GGA-211945	Phase I - Functionalization of compounds	5	/	143	0.0119635	0.194402	0.522634	5	/	83	0.0132271	ENSGALG00000001314;ENSGALG00000040247	Q7T048;A0A1D5PM03;A0A1D5PII5;A0A1L1RZ33;F1P3I2	R-GGA-140355;R-GGA-8937169;R-GGA-8936849;R-GGA-140359;R-GGA-8937191
R-GGA-5685942	HDR through Homologous Recombination (HRR)	2	/	97	0.00811512	0.615699	0.615699	10	/	15	0.00239044	ENSGALG00000006794	F1NEG1;A0A1D5P8T3	R-GGA-5686469;R-GGA-5693589;R-GGA-5685341;R-GGA-5693620;R-GGA-5693593;R-GGA-5693561;R-GGA-5693539;R-GGA-5685838;R-GGA-5693584;R-GGA-5686483
R-GGA-9006936	Signaling by TGF-beta family members	1	/	151	0.0126328	0.961404	0.961404	1	/	78	0.0124303	ENSGALG00000003120	E1C3T2	R-GGA-173481
R-GGA-5576891	Cardiac conduction	1	/	159	0.0133021	0.967554	0.967554	1	/	16	0.0025498	ENSGALG00000036964	A0A1D5P193	R-GGA-5577213
R-GGA-375280	Amine ligand-binding receptors	1	/	46	0.00384841	0.627341	0.627341	1	/	17	0.00270916	ENSGALG00000001383	F1NJL4	R-GGA-390931
R-GGA-2565942	Regulation of PLK1 Activity at G2/M Transition	3	/	154	0.0128838	0.641914	0.641914	2	/	10	0.00159363	ENSGALG00000000433	F1NXR6;A0A1L1RJP8;A0A1L1RJ25	R-GGA-3000319;R-GGA-3000310
R-GGA-2173795	Downregulation of SMAD2/3:SMAD4 transcriptional activity	1	/	48	0.00401573	0.643027	0.643027	1	/	19	0.00302789	ENSGALG00000003120	E1C3T2	R-GGA-173481
R-GGA-380320	Recruitment of NuMA to mitotic centrosomes	3	/	156	0.0130511	0.650499	0.650499	2	/	2	0.000318725	ENSGALG00000000433	F1NXR6;A0A1L1RJP8;A0A1L1RJ25	R-GGA-380316;R-GGA-380508
R-GGA-8856825	Cargo recognition for clathrin-mediated endocytosis	3	/	157	0.0131348	0.654736	0.654736	2	/	13	0.00207171	ENSGALG00000011621;ENSGALG00000006045	A0A1D5P7X1;F1NVD2;F1NB17	R-GGA-8866279;R-GGA-8866277
R-GGA-69481	G2/M Checkpoints	2	/	109	0.00911905	0.6784	0.6784	2	/	12	0.00191235	ENSGALG00000006794	F1NEG1;A0A1D5P8T3	R-GGA-5683735;R-GGA-69891
R-GGA-3769402	Deactivation of the beta-catenin transactivating complex	1	/	53	0.00443403	0.679424	0.679424	1	/	13	0.00207171	ENSGALG00000039942	Q5ZIZ6	R-GGA-3361751
R-GGA-532668	N-glycan trimming in the ER and Calnexin/Calreticulin cycle	1	/	53	0.00443403	0.679424	0.679424	1	/	14	0.00223108	ENSGALG00000011816	F1NLP8	R-GGA-8853379
R-GGA-6807070	PTEN Regulation	3	/	166	0.0138877	0.691216	0.691216	1	/	17	0.00270916	ENSGALG00000000699	A0A1D5P8K6;E1C3L4;A0A1D5PAN8	R-GGA-6807134
R-GGA-8957322	Metabolism of steroids	2	/	161	0.0134694	0.860345	0.860345	7	/	136	0.0216733	ENSGALG00000041687;ENSGALG00000032149	A0A1D5P2S4;A0A1D5PX69	R-GGA-1655842;R-GGA-1655851;R-GGA-2065550;R-GGA-2065549;R-GGA-1655831;R-GGA-2065539;R-GGA-8867667
R-GGA-6811434	COPI-dependent Golgi-to-ER retrograde traffic	3	/	167	0.0139714	0.695086	0.695086	2	/	7	0.00111554	ENSGALG00000000433	F1NXR6;A0A1L1RJP8;A0A1L1RJ25	R-GGA-6811423;R-GGA-6811426
R-GGA-168898	Toll-like Receptor Cascades	3	/	169	0.0141387	0.702716	0.702716	3	/	95	0.0151394	ENSGALG00000004370	A0A1L1S0H7;A0A1D5PHN6;F1NVF2	R-GGA-450333;R-GGA-450346;R-GGA-450296
R-GGA-1474228	Degradation of the extracellular matrix	2	/	162	0.0135531	0.862676	0.862676	1	/	68	0.0108367	ENSGALG00000037625	A0A1D5NXE0;A0A1D5NW86	R-GGA-2485148
R-GGA-5693567	HDR through Homologous Recombination (HRR) or Single Strand Annealing (SSA)	2	/	116	0.00970468	0.710984	0.710984	26	/	34	0.00541833	ENSGALG00000006794	F1NEG1;A0A1D5P8T3	R-GGA-5684875;R-GGA-5684081;R-GGA-5693580;R-GGA-5685838;R-GGA-5685011;R-GGA-5684887;R-GGA-5685156;R-GGA-5686642;R-GGA-5684882;R-GGA-5685341;R-GGA-5693620;R-GGA-5693564;R-GGA-5693561;R-GGA-5693539;R-GGA-5693542;R-GGA-5686483;R-GGA-5693608;R-GGA-5686469;R-GGA-5685994;R-GGA-5693589;R-GGA-5684108;R-GGA-5685985;R-GGA-5693593;R-GGA-5684140;R-GGA-5684096;R-GGA-5693584
R-GGA-6811442	Intra-Golgi and retrograde Golgi-to-ER traffic	6	/	330	0.0276081	0.711479	0.711479	8	/	37	0.00589641	ENSGALG00000000433;ENSGALG00000011621;ENSGALG00000012281	A0A1D5P7X1;F1NXR6;A0A1L1RJP8;F1NBV7;F1NVD2;A0A1L1RJ25	R-GGA-6811423;R-GGA-6811426;R-GGA-6814675;R-GGA-6814671;R-GGA-8849353;R-GGA-8849350;R-GGA-6814670;R-GGA-8848484
R-GGA-8939243	RUNX1 interacts with co-factors whose precise effect on RUNX1 targets is not known	1	/	58	0.00485234	0.712123	0.712123	1	/	5	0.000796813	ENSGALG00000031718	P21869	R-GGA-8937989
R-GGA-177929	Signaling by EGFR	1	/	58	0.00485234	0.712123	0.712123	7	/	45	0.00717131	ENSGALG00000006045	F1NB17	R-GGA-8867047;R-GGA-182990;R-GGA-182986;R-GGA-183002;R-GGA-182994;R-GGA-8867041;R-GGA-8951490
R-GGA-5632684	Hedgehog 'on' state	3	/	172	0.0143897	0.713888	0.713888	1	/	23	0.00366534	ENSGALG00000000433	F1NXR6;A0A1L1RJP8;A0A1L1RJ25	R-GGA-5610767
R-GGA-8853659	RET signaling	1	/	59	0.004936	0.718253	0.718253	1	/	22	0.00350598	ENSGALG00000002583	F1NHX1	R-GGA-8854905
R-GGA-8856688	Golgi-to-ER retrograde transport	4	/	228	0.0190747	0.720847	0.720847	5	/	14	0.00223108	ENSGALG00000000433;ENSGALG00000012281	F1NXR6;A0A1L1RJP8;F1NBV7;A0A1L1RJ25	R-GGA-6811423;R-GGA-6811426;R-GGA-8849353;R-GGA-8849350;R-GGA-8848484
R-GGA-5693538	Homology Directed Repair	2	/	120	0.0100393	0.728338	0.728338	32	/	40	0.0063745	ENSGALG00000006794	F1NEG1;A0A1D5P8T3	R-GGA-5687484;R-GGA-5684875;R-GGA-5684081;R-GGA-5693580;R-GGA-5685838;R-GGA-5687465;R-GGA-5687464;R-GGA-5685011;R-GGA-5684887;R-GGA-5685156;R-GGA-5686642;R-GGA-5684882;R-GGA-5685341;R-GGA-5693620;R-GGA-5693564;R-GGA-5693561;R-GGA-5693539;R-GGA-5693542;R-GGA-5686483;R-GGA-5693608;R-GGA-5687664;R-GGA-5686469;R-GGA-5685994;R-GGA-5693589;R-GGA-5684108;R-GGA-5685985;R-GGA-5693593;R-GGA-5684140;R-GGA-5…
R-GGA-114608	Platelet degranulation	3	/	177	0.014808	0.731787	0.731787	1	/	8	0.0012749	ENSGALG00000000433	F1NXR6;A0A1L1RJP8;A0A1L1RJ25	R-GGA-482772
R-GGA-4086398	Ca2+ pathway	1	/	62	0.00518698	0.735872	0.735872	2	/	15	0.00239044	ENSGALG00000030847	A0A1D5PEC1	R-GGA-3965447;R-GGA-3965444
R-GGA-5620912	Anchoring of the basal body to the plasma membrane	3	/	170	0.0142224	0.706476	0.706476	6	/	7	0.00111554	ENSGALG00000000433	F1NXR6;A0A1L1RJP8;A0A1L1RJ25	R-GGA-5626681;R-GGA-5617816;R-GGA-5638009;R-GGA-5626220;R-GGA-5626228;R-GGA-5626227
R-GGA-6807878	COPI-mediated anterograde transport	3	/	183	0.01531	0.752095	0.752095	2	/	8	0.0012749	ENSGALG00000000433	F1NXR6;A0A1L1RJP8;A0A1L1RJ25	R-GGA-6809003;R-GGA-6809006
R-GGA-76005	Response to elevated platelet cytosolic Ca2+	3	/	184	0.0153936	0.755358	0.755358	1	/	10	0.00159363	ENSGALG00000000433	F1NXR6;A0A1L1RJP8;A0A1L1RJ25	R-GGA-482772
R-GGA-1630316	Glycosaminoglycan metabolism	2	/	184	0.0153936	0.905721	0.905721	2	/	74	0.0117928	ENSGALG00000011328	F1NW93;A0A1D5PIW3	R-GGA-1630306;R-GGA-2090079
R-GGA-428157	Sphingolipid metabolism	2	/	132	0.0110433	0.775186	0.775186	2	/	58	0.00924303	ENSGALG00000011328	F1NW93;A0A1D5PIW3	R-GGA-1605624;R-GGA-1606312
R-GGA-983231	Factors involved in megakaryocyte development and platelet production	8	/	207	0.0173178	0.079421	0.522634	4	/	28	0.00446215	ENSGALG00000000433;ENSGALG00000002335;ENSGALG00000001828	A0A1D5PMB7;F1NXR6;A0A1L1RJP8;F1NFS1;F1P160;A0A1L1RJ25;A0A1D5PI26;A0A1D5NWK0	R-GGA-983266;R-GGA-1011598;R-GGA-997237;R-GGA-983259
R-GGA-2173793	Transcriptional activity of SMAD2/SMAD3:SMAD4 heterotrimer	1	/	81	0.00677654	0.824602	0.824602	1	/	29	0.00462151	ENSGALG00000003120	E1C3T2	R-GGA-173481
R-GGA-5610787	Hedgehog 'off' state	3	/	209	0.0174852	0.826209	0.826209	2	/	20	0.00318725	ENSGALG00000000433	F1NXR6;A0A1L1RJP8;A0A1L1RJ25	R-GGA-5610767;R-GGA-5610733
R-GGA-5663220	RHO GTPases Activate Formins	3	/	226	0.0189074	0.863735	0.863735	1	/	12	0.00191235	ENSGALG00000000433	F1NXR6;A0A1L1RJP8;A0A1L1RJ25	R-GGA-375302
R-GGA-350562	Regulation of ornithine decarboxylase (ODC)	1	/	84	0.00702752	0.835591	0.835591	1	/	4	0.00063745	ENSGALG00000023437	E1BYW3	R-GGA-350578
R-GGA-375276	Peptide ligand-binding receptors	2	/	155	0.0129675	0.845592	0.845592	1	/	51	0.00812749	ENSGALG00000007785	F1NP50;A0A1D5PTL9	R-GGA-444691
R-GGA-4608870	Asymmetric localization of PCP proteins	1	/	87	0.00727851	0.845894	0.845894	1	/	2	0.000318725	ENSGALG00000030847	A0A1D5PEC1	R-GGA-5099886
R-GGA-1257604	PIP3 activates AKT signaling	4	/	282	0.0235924	0.855459	0.855459	2	/	25	0.00398406	ENSGALG00000000699;ENSGALG00000002583	A0A1D5P8K6;F1NHX1;E1C3L4;A0A1D5PAN8	R-GGA-2316434;R-GGA-6807134
R-GGA-8856828	Clathrin-mediated endocytosis	3	/	223	0.0186564	0.857676	0.857676	15	/	31	0.00494024	ENSGALG00000011621;ENSGALG00000006045	A0A1D5P7X1;F1NVD2;F1NB17	R-GGA-8868072;R-GGA-8866279;R-GGA-8868651;R-GGA-8868071;R-GGA-8868660;R-GGA-8868659;R-GGA-8868236;R-GGA-8868648;R-GGA-8868661;R-GGA-8868658;R-GGA-8868230;R-GGA-8871194;R-GGA-8871193;R-GGA-8867756;R-GGA-8866277
R-GGA-211859	Biological oxidations	6	/	254	0.0212499	0.461578	0.522634	6	/	141	0.0224701	ENSGALG00000001314;ENSGALG00000040247;ENSGALG00000005626	Q7T048;A0A1D5PM03;A0A1D5PII5;A0A1L1RZ33;F1P3I2;F1NGS3	R-GGA-8954262;R-GGA-140355;R-GGA-8937169;R-GGA-8936849;R-GGA-140359;R-GGA-8937191
R-GGA-8978868	Fatty acid metabolism	2	/	259	0.0216682	0.975533	0.975533	3	/	154	0.0245418	ENSGALG00000001314	A0A1D5PM03;F1P3I2	R-GGA-2314678;R-GGA-140355;R-GGA-140359
R-GGA-72163	mRNA Splicing - Major Pathway	3	/	264	0.0220865	0.922961	0.922961	3	/	3	0.000478088	ENSGALG00000012364;ENSGALG00000021679	E1C3R0;Q66VY4;A0A1D5PTP8	R-GGA-72139;R-GGA-72143;R-GGA-156661
R-GGA-2500257	Resolution of Sister Chromatid Cohesion	3	/	228	0.0190747	0.867648	0.867648	4	/	7	0.00111554	ENSGALG00000000433	F1NXR6;A0A1L1RJP8;A0A1L1RJ25	R-GGA-2484822;R-GGA-1638803;R-GGA-1638821;R-GGA-2468287
R-GGA-429914	Deadenylation-dependent mRNA decay	1	/	96	0.00803146	0.8731	0.8731	1	/	9	0.00143426	ENSGALG00000039917	A0A1D5PLG0	R-GGA-430028
R-GGA-72312	rRNA processing	1	/	98	0.00819878	0.878463	0.878463	1	/	2	0.000318725	ENSGALG00000039917	A0A1D5PLG0	R-GGA-6791222
R-GGA-6791226	Major pathway of rRNA processing in the nucleolus and cytosol	1	/	98	0.00819878	0.878463	0.878463	1	/	2	0.000318725	ENSGALG00000039917	A0A1D5PLG0	R-GGA-6791222
R-GGA-8868773	rRNA processing in the nucleus and cytosol	1	/	98	0.00819878	0.878463	0.878463	1	/	2	0.000318725	ENSGALG00000039917	A0A1D5PLG0	R-GGA-6791222
R-GGA-194840	Rho GTPase cycle	1	/	267	0.0223375	0.996921	0.996921	1	/	4	0.00063745	ENSGALG00000046068	A0A1L1RVX8	R-GGA-194922
R-GGA-4086400	PCP/CE pathway	1	/	105	0.00878441	0.895518	0.895518	3	/	5	0.000796813	ENSGALG00000030847	A0A1D5PEC1	R-GGA-5099886;R-GGA-5140741;R-GGA-5140747
R-GGA-156580	Phase II - Conjugation of compounds	1	/	107	0.00895173	0.899938	0.899938	1	/	49	0.00780876	ENSGALG00000005626	F1NGS3	R-GGA-8954262
R-GGA-5689880	Ub-specific processing proteases	4	/	270	0.0225885	0.831466	0.831466	2	/	31	0.00494024	ENSGALG00000006824	A0A1D5NWW3;F1NES4;A0A1D5PHP0;A0A1D5PJM2	R-GGA-6781797;R-GGA-6781814
R-GGA-6811558	PI5P, PP2A and IER3 Regulate PI3K/AKT Signaling	1	/	114	0.00953735	0.913989	0.913989	1	/	4	0.00063745	ENSGALG00000002583	F1NHX1	R-GGA-2316434
R-GGA-199418	Negative regulation of the PI3K/AKT network	1	/	115	0.00962102	0.915829	0.915829	1	/	5	0.000796813	ENSGALG00000002583	F1NHX1	R-GGA-2316434
R-GGA-397014	Muscle contraction	1	/	272	0.0227558	0.997241	0.997241	1	/	26	0.00414343	ENSGALG00000036964	A0A1D5P193	R-GGA-5577213
R-GGA-72172	mRNA Splicing	3	/	277	0.0231741	0.937082	0.937082	3	/	7	0.00111554	ENSGALG00000012364;ENSGALG00000021679	E1C3R0;Q66VY4;A0A1D5PTP8	R-GGA-72139;R-GGA-72143;R-GGA-156661
R-GGA-9006925	Intracellular signaling by second messengers	4	/	328	0.0274408	0.922367	0.922367	2	/	35	0.00557769	ENSGALG00000000699;ENSGALG00000002583	A0A1D5P8K6;F1NHX1;E1C3L4;A0A1D5PAN8	R-GGA-2316434;R-GGA-6807134
R-GGA-5617833	Cilium Assembly	3	/	316	0.0264369	0.966377	0.966377	12	/	40	0.0063745	ENSGALG00000000433	F1NXR6;A0A1L1RJP8;A0A1L1RJ25	R-GGA-5624952;R-GGA-5626681;R-GGA-5617816;R-GGA-5638009;R-GGA-5625421;R-GGA-5624949;R-GGA-5625416;R-GGA-5626220;R-GGA-5625426;R-GGA-5626228;R-GGA-5625424;R-GGA-5626227
R-GGA-5358351	Signaling by Hedgehog	3	/	266	0.0222538	0.925307	0.925307	2	/	53	0.00844622	ENSGALG00000000433	F1NXR6;A0A1L1RJP8;A0A1L1RJ25	R-GGA-5610767;R-GGA-5610733
R-GGA-170834	Signaling by TGF-beta Receptor Complex	1	/	121	0.010123	0.926074	0.926074	1	/	57	0.00908367	ENSGALG00000003120	E1C3T2	R-GGA-173481
R-GGA-199977	ER to Golgi Anterograde Transport	3	/	268	0.0224211	0.927587	0.927587	2	/	29	0.00462151	ENSGALG00000000433	F1NXR6;A0A1L1RJP8;A0A1L1RJ25	R-GGA-6809003;R-GGA-6809006
R-GGA-76002	Platelet activation, signaling and aggregation	4	/	334	0.0279428	0.928662	0.928662	2	/	84	0.0133865	ENSGALG00000000433;ENSGALG00000026167	F1NXR6;A0A1L1RJP8;F1NUD8;A0A1L1RJ25	R-GGA-482772;R-GGA-437162
R-GGA-5693532	DNA Double-Strand Break Repair	2	/	204	0.0170668	0.933605	0.933605	68	/	91	0.014502	ENSGALG00000006794	F1NEG1;A0A1D5P8T3	R-GGA-5686704;R-GGA-5687484;R-GGA-5684875;R-GGA-5693580;R-GGA-5685838;R-GGA-5686685;R-GGA-5687465;R-GGA-5687464;R-GGA-5693583;R-GGA-5686642;R-GGA-5683986;R-GGA-5693620;R-GGA-5683384;R-GGA-5683077;R-GGA-5682992;R-GGA-5683964;R-GGA-5693602;R-GGA-5682983;R-GGA-5693598;R-GGA-5682967;R-GGA-5693612;R-GGA-5683967;R-GGA-5693608;R-GGA-5687664;R-GGA-5685994;R-GGA-5693589;R-GGA-5682044;R-GGA-5685985;R-GGA-3…
R-GGA-450531	Regulation of mRNA stability by proteins that bind AU-rich elements	1	/	126	0.0105413	0.933655	0.933655	2	/	16	0.0025498	ENSGALG00000039917	A0A1D5PLG0	R-GGA-450488;R-GGA-450422
R-GGA-6794362	Protein-protein interactions at synapses	1	/	127	0.0106249	0.935076	0.935076	1	/	15	0.00239044	ENSGALG00000007253	E1C117	R-GGA-6800380
R-GGA-418594	G alpha (i) signalling events	2	/	327	0.0273571	0.993241	0.993241	3	/	94	0.0149801	ENSGALG00000003839;ENSGALG00000028519	E1C8F2;R4GH78	R-GGA-749456;R-GGA-749454;R-GGA-380073
R-GGA-3700989	Transcriptional Regulation by TP53	3	/	277	0.0231741	0.937082	0.937082	1	/	68	0.0108367	ENSGALG00000004370	A0A1L1S0H7;A0A1D5PHN6;F1NVF2	R-GGA-8877691
R-GGA-5389840	Mitochondrial translation elongation	1	/	129	0.0107923	0.937827	0.937827	1	/	1	0.000159363	ENSGALG00000014387	H9L0I5	R-GGA-5419261
R-GGA-449147	Signaling by Interleukins	7	/	350	0.0292814	0.62435	0.62435	21	/	270	0.0430279	ENSGALG00000004370;ENSGALG00000007253;ENSGALG00000029940;ENSGALG00000002583	E1C117;A0A1L1S0H7;A0A1D5P4U4;A0A1D5PHN6;F1NHX1;F1NVF2;O73909	R-GGA-727819;R-GGA-450333;R-GGA-914182;R-GGA-446868;R-GGA-445753;R-GGA-445752;R-GGA-450133;R-GGA-450346;R-GGA-446694;R-GGA-450296;R-GGA-449058;R-GGA-446862;R-GGA-446701;R-GGA-446684;R-GGA-448703;R-GGA-507719;R-GGA-446130;R-GGA-912627;R-GGA-879917;R-GGA-446648;R-GGA-446634
R-GGA-5419276	Mitochondrial translation termination	1	/	133	0.0111269	0.942986	0.942986	4	/	4	0.00063745	ENSGALG00000014387	H9L0I5	R-GGA-5419271;R-GGA-5419264;R-GGA-5419281;R-GGA-5419273
R-GGA-195253	Degradation of beta-catenin by the destruction complex	1	/	134	0.0112106	0.944207	0.944207	1	/	15	0.00239044	ENSGALG00000039942	Q5ZIZ6	R-GGA-5334050
R-GGA-5368287	Mitochondrial translation	1	/	135	0.0112942	0.945403	0.945403	5	/	5	0.000796813	ENSGALG00000014387	H9L0I5	R-GGA-5419261;R-GGA-5419271;R-GGA-5419264;R-GGA-5419281;R-GGA-5419273
R-GGA-201681	TCF dependent signaling in response to WNT	2	/	215	0.0179871	0.945419	0.945419	4	/	49	0.00780876	ENSGALG00000039942;ENSGALG00000030847	A0A1D5PEC1;Q5ZIZ6	R-GGA-201685;R-GGA-3361751;R-GGA-1504186;R-GGA-201677
R-GGA-5689603	UCH proteinases	1	/	136	0.0113779	0.946573	0.946573	1	/	7	0.00111554	ENSGALG00000004460	F1NSF2	R-GGA-5689630
R-GGA-373076	Class A/1 (Rhodopsin-like receptors)	3	/	292	0.024429	0.950396	0.950396	2	/	108	0.0172112	ENSGALG00000007785;ENSGALG00000001383	F1NP50;A0A1D5PTL9;F1NJL4	R-GGA-444691;R-GGA-390931
R-GGA-69275	G2/M Transition	3	/	300	0.0250983	0.956378	0.956378	13	/	45	0.00717131	ENSGALG00000000433	F1NXR6;A0A1L1RJP8;A0A1L1RJ25	R-GGA-8852298;R-GGA-8853419;R-GGA-8852306;R-GGA-380311;R-GGA-8853405;R-GGA-3000319;R-GGA-3000310;R-GGA-8852280;R-GGA-380294;R-GGA-380283;R-GGA-380455;R-GGA-380272;R-GGA-380303
R-GGA-500792	GPCR ligand binding	4	/	371	0.0310382	0.958308	0.958308	3	/	124	0.019761	ENSGALG00000003839;ENSGALG00000007785;ENSGALG00000001383	F1NP50;A0A1D5PTL9;F1NJL4;E1C8F2	R-GGA-373075;R-GGA-444691;R-GGA-390931
R-GGA-418555	G alpha (s) signalling events	1	/	148	0.0123818	0.958809	0.958809	3	/	11	0.00175299	ENSGALG00000001383	F1NJL4	R-GGA-744887;R-GGA-744886;R-GGA-379044
R-GGA-453274	Mitotic G2-G2/M phases	3	/	304	0.0254329	0.95911	0.95911	13	/	47	0.00749004	ENSGALG00000000433	F1NXR6;A0A1L1RJP8;A0A1L1RJ25	R-GGA-8852298;R-GGA-8853419;R-GGA-8852306;R-GGA-380311;R-GGA-8853405;R-GGA-3000319;R-GGA-3000310;R-GGA-8852280;R-GGA-380294;R-GGA-380283;R-GGA-380455;R-GGA-380272;R-GGA-380303
R-GGA-71387	Metabolism of carbohydrates	2	/	363	0.0303689	0.99664	0.99664	2	/	170	0.0270916	ENSGALG00000011328	F1NW93;A0A1D5PIW3	R-GGA-1630306;R-GGA-2090079
R-GGA-948021	Transport to the Golgi and subsequent modification	3	/	311	0.0260186	0.96351	0.96351	2	/	47	0.00749004	ENSGALG00000000433	F1NXR6;A0A1L1RJP8;A0A1L1RJ25	R-GGA-6809003;R-GGA-6809006
R-GGA-195721	Signaling by WNT	3	/	313	0.0261859	0.964684	0.964684	16	/	94	0.0149801	ENSGALG00000039942;ENSGALG00000034196;ENSGALG00000030847	A0A1D5PEC1;Q5ZIZ6;A0A1D5NX70	R-GGA-3247837;R-GGA-201685;R-GGA-3247840;R-GGA-3361751;R-GGA-1504186;R-GGA-201677;R-GGA-5140747;R-GGA-3965447;R-GGA-3965444;R-GGA-5334050;R-GGA-5099886;R-GGA-3781941;R-GGA-3247844;R-GGA-5140741;R-GGA-3247843;R-GGA-3781943
R-GGA-983705	Signaling by the B Cell Receptor (BCR)	1	/	156	0.0130511	0.965372	0.965372	1	/	15	0.00239044	ENSGALG00000002583	F1NHX1	R-GGA-2045911
R-GGA-1852241	Organelle biogenesis and maintenance	3	/	368	0.0307873	0.985964	0.985964	12	/	45	0.00717131	ENSGALG00000000433	F1NXR6;A0A1L1RJP8;A0A1L1RJ25	R-GGA-5624952;R-GGA-5626681;R-GGA-5617816;R-GGA-5638009;R-GGA-5625421;R-GGA-5624949;R-GGA-5625416;R-GGA-5626220;R-GGA-5625426;R-GGA-5626228;R-GGA-5625424;R-GGA-5626227
R-GGA-195258	RHO GTPase Effectors	3	/	381	0.0318748	0.988784	0.988784	2	/	55	0.00876494	ENSGALG00000000433	F1NXR6;A0A1L1RJP8;A0A1L1RJ25	R-GGA-5672329;R-GGA-375302
R-GGA-5688426	Deubiquitination	5	/	384	0.0321258	0.915988	0.915988	3	/	61	0.00972112	ENSGALG00000004460;ENSGALG00000006824	A0A1D5NWW3;F1NSF2;F1NES4;A0A1D5PHP0;A0A1D5PJM2	R-GGA-6781797;R-GGA-5689630;R-GGA-6781814
R-GGA-3858494	Beta-catenin independent WNT signaling	1	/	161	0.0134694	0.968933	0.968933	5	/	20	0.00318725	ENSGALG00000030847	A0A1D5PEC1	R-GGA-5099886;R-GGA-5140741;R-GGA-5140747;R-GGA-3965447;R-GGA-3965444
R-GGA-15869	Metabolism of nucleotides	1	/	164	0.0137204	0.970892	0.970892	1	/	124	0.019761	ENSGALG00000030925	A0A1D5PR69	R-GGA-6788912
R-GGA-3108232	SUMO E3 ligases SUMOylate target proteins	1	/	169	0.0141387	0.973887	0.973887	1	/	22	0.00350598	ENSGALG00000039942	Q5ZIZ6	R-GGA-3108203
R-GGA-416476	G alpha (q) signalling events	2	/	259	0.0216682	0.975533	0.975533	3	/	24	0.0038247	ENSGALG00000007785	F1NP50;A0A1D5PTL9	R-GGA-749452;R-GGA-379048;R-GGA-749448
R-GGA-422475	Axon guidance	1	/	398	0.0332971	0.999828	0.999828	1	/	128	0.0203984	ENSGALG00000002583	F1NHX1	R-GGA-8854905
R-GGA-2467813	Separation of Sister Chromatids	3	/	337	0.0281938	0.97626	0.97626	1	/	7	0.00111554	ENSGALG00000000433	F1NXR6;A0A1L1RJP8;A0A1L1RJ25	R-GGA-2467809
R-GGA-2990846	SUMOylation	1	/	174	0.014557	0.976576	0.976576	1	/	23	0.00366534	ENSGALG00000039942	Q5ZIZ6	R-GGA-3108203
R-GGA-68877	Mitotic Prometaphase	3	/	343	0.0286957	0.978533	0.978533	7	/	11	0.00175299	ENSGALG00000000433	F1NXR6;A0A1L1RJP8;A0A1L1RJ25	R-GGA-2484822;R-GGA-380316;R-GGA-1638803;R-GGA-380508;R-GGA-1638821;R-GGA-375302;R-GGA-2468287
R-GGA-68882	Mitotic Anaphase	3	/	347	0.0290304	0.979932	0.979932	1	/	9	0.00143426	ENSGALG00000000433	F1NXR6;A0A1L1RJP8;A0A1L1RJ25	R-GGA-2467809
R-GGA-2555396	Mitotic Metaphase and Anaphase	3	/	348	0.029114	0.980268	0.980268	1	/	10	0.00159363	ENSGALG00000000433	F1NXR6;A0A1L1RJP8;A0A1L1RJ25	R-GGA-2467809
R-GGA-72203	Processing of Capped Intron-Containing Pre-mRNA	3	/	403	0.0337154	0.992362	0.992362	3	/	11	0.00175299	ENSGALG00000012364;ENSGALG00000021679	E1C3R0;Q66VY4;A0A1D5PTP8	R-GGA-72139;R-GGA-72143;R-GGA-156661
R-GGA-1474244	Extracellular matrix organization	11	/	409	0.0342174	0.263405	0.522634	15	/	212	0.0337849	ENSGALG00000039219;ENSGALG00000037625;ENSGALG00000006802	E1C700;A0A1D5PVM8;F1NQ88;A0A1D5NXE0;A0A1D5NW86;A0A1D5PMA9;A0A1D5P4L2;A0A1D5PGG9;A0A1D5P4Q9;A0A1D5P958;A0A1D5NYS7	R-GGA-4084505;R-GGA-2426450;R-GGA-3907292;R-GGA-2161282;R-GGA-2129353;R-GGA-2396399;R-GGA-216058;R-GGA-216048;R-GGA-2129385;R-GGA-1592387;R-GGA-2002428;R-GGA-2129375;R-GGA-2129362;R-GGA-2129357;R-GGA-2485148
R-GGA-71291	Metabolism of amino acids and derivatives	3	/	391	0.0327115	0.990574	0.990574	2	/	199	0.0317131	ENSGALG00000023437;ENSGALG00000041419	A0A1D5P534;A0A1D5PU08;E1BYW3	R-GGA-350578;R-GGA-200396
R-GGA-1280215	Cytokine Signaling in Immune system	7	/	425	0.0355559	0.807309	0.807309	21	/	342	0.054502	ENSGALG00000004370;ENSGALG00000007253;ENSGALG00000029940;ENSGALG00000002583	E1C117;A0A1L1S0H7;A0A1D5P4U4;A0A1D5PHN6;F1NHX1;F1NVF2;O73909	R-GGA-727819;R-GGA-450333;R-GGA-914182;R-GGA-446868;R-GGA-445753;R-GGA-445752;R-GGA-450133;R-GGA-450346;R-GGA-446694;R-GGA-450296;R-GGA-449058;R-GGA-446862;R-GGA-446701;R-GGA-446684;R-GGA-448703;R-GGA-507719;R-GGA-446130;R-GGA-912627;R-GGA-879917;R-GGA-446648;R-GGA-446634
R-GGA-73894	DNA Repair	2	/	432	0.0361416	0.999144	0.999144	68	/	203	0.0323506	ENSGALG00000006794	F1NEG1;A0A1D5P8T3	R-GGA-5686704;R-GGA-5687484;R-GGA-5684875;R-GGA-5693580;R-GGA-5685838;R-GGA-5686685;R-GGA-5687465;R-GGA-5687464;R-GGA-5693583;R-GGA-5686642;R-GGA-5683986;R-GGA-5693620;R-GGA-5683384;R-GGA-5683077;R-GGA-5682992;R-GGA-5683964;R-GGA-5693602;R-GGA-5682983;R-GGA-5693598;R-GGA-5682967;R-GGA-5693612;R-GGA-5683967;R-GGA-5693608;R-GGA-5687664;R-GGA-5685994;R-GGA-5693589;R-GGA-5682044;R-GGA-5685985;R-GGA-3…
R-GGA-983168	Antigen processing: Ubiquitination & Proteasome degradation	4	/	483	0.0404083	0.992837	0.992837	4	/	7	0.00111554	ENSGALG00000041934;ENSGALG00000001668	A0A1D5PIZ1;A0A1L1S0T9;R4GIV8;A0A1L1RUL3	R-GGA-983140;R-GGA-983156;R-GGA-8940641;R-GGA-983157
R-GGA-446203	Asparagine N-linked glycosylation	4	/	486	0.0406592	0.993183	0.993183	3	/	108	0.0172112	ENSGALG00000000433;ENSGALG00000011816	F1NXR6;A0A1L1RJP8;F1NLP8;A0A1L1RJ25	R-GGA-8853379;R-GGA-6809003;R-GGA-6809006
R-GGA-8878171	Transcriptional regulation by RUNX1	1	/	231	0.0193257	0.993234	0.993234	1	/	34	0.00541833	ENSGALG00000031718	P21869	R-GGA-8937989
R-GGA-2262752	Cellular responses to stress	8	/	457	0.0382331	0.765246	0.765246	13	/	104	0.0165737	ENSGALG00000004370;ENSGALG00000000433;ENSGALG00000006794	A0A1L1S0H7;A0A1D5PHN6;F1NXR6;F1NVF2;A0A1L1RJP8;F1NEG1;A0A1D5P8T3;A0A1L1RJ25	R-GGA-3228469;R-GGA-450333;R-GGA-5682018;R-GGA-450296;R-GGA-5618080;R-GGA-3238999;R-GGA-5693540;R-GGA-5693612;R-GGA-5682044;R-GGA-3785768;R-GGA-6792712;R-GGA-5682020;R-GGA-5682026
R-GGA-983169	Class I MHC mediated antigen processing & presentation	4	/	524	0.0438384	0.996393	0.996393	4	/	18	0.00286853	ENSGALG00000041934;ENSGALG00000001668	A0A1D5PIZ1;A0A1L1S0T9;R4GIV8;A0A1L1RUL3	R-GGA-983140;R-GGA-983156;R-GGA-8940641;R-GGA-983157
R-GGA-112316	Neuronal System	1	/	511	0.0427508	0.999986	0.999986	1	/	113	0.018008	ENSGALG00000007253	E1C117	R-GGA-6800380
R-GGA-1266738	Developmental Biology	3	/	549	0.0459299	0.999473	0.999473	4	/	159	0.0253386	ENSGALG00000002201;ENSGALG00000002583	A0A1D5PTH5;F1NHX1;F1NV96	R-GGA-6814187;R-GGA-6810843;R-GGA-6814374;R-GGA-8854905
R-GGA-9006934	Signaling by Receptor Tyrosine Kinases	12	/	555	0.0464319	0.527807	0.527807	14	/	462	0.0736255	ENSGALG00000031440;ENSGALG00000006045;ENSGALG00000001828;ENSGALG00000006802	E1C700;A0A1D5P4W3;A0A1D5PVM8;A0A1D5PMA9;A0A1D5NXU4;F1NFS1;A0A1D5P4L2;A0A1D5PGG9;A0A1D5NYS7;A0A1D5PI26;A0A1D5NWK0;F1NB17	R-GGA-8867047;R-GGA-205319;R-GGA-182986;R-GGA-183002;R-GGA-182994;R-GGA-8867041;R-GGA-1433423;R-GGA-205244;R-GGA-182990;R-GGA-8875482;R-GGA-1433506;R-GGA-8951490;R-GGA-8874079;R-GGA-8875490
R-GGA-69620	Cell Cycle Checkpoints	2	/	396	0.0331298	0.998245	0.998245	2	/	32	0.0050996	ENSGALG00000006794	F1NEG1;A0A1D5P8T3	R-GGA-5683735;R-GGA-69891
R-GGA-8953897	Cellular responses to external stimuli	8	/	566	0.0473521	0.920766	0.920766	13	/	139	0.0221514	ENSGALG00000004370;ENSGALG00000000433;ENSGALG00000006794	A0A1L1S0H7;A0A1D5PHN6;F1NXR6;F1NVF2;A0A1L1RJP8;F1NEG1;A0A1D5P8T3;A0A1L1RJ25	R-GGA-3228469;R-GGA-450333;R-GGA-5682018;R-GGA-450296;R-GGA-5618080;R-GGA-3238999;R-GGA-5693540;R-GGA-5693612;R-GGA-5682044;R-GGA-3785768;R-GGA-6792712;R-GGA-5682020;R-GGA-5682026
R-GGA-194315	Signaling by Rho GTPases	4	/	633	0.0529574	0.999464	0.999464	3	/	59	0.00940239	ENSGALG00000046068;ENSGALG00000000433	F1NXR6;A0A1L1RJP8;A0A1L1RVX8;A0A1L1RJ25	R-GGA-5672329;R-GGA-194922;R-GGA-375302
R-GGA-109582	Hemostasis	9	/	702	0.05873	0.967146	0.967146	6	/	221	0.0352191	ENSGALG00000000433;ENSGALG00000002335;ENSGALG00000001828;ENSGALG00000026167	A0A1D5PMB7;F1NXR6;A0A1L1RJP8;F1NFS1;F1NUD8;F1P160;A0A1L1RJ25;A0A1D5PI26;A0A1D5NWK0	R-GGA-482772;R-GGA-983266;R-GGA-1011598;R-GGA-997237;R-GGA-983259;R-GGA-437162
R-GGA-6798695	Neutrophil degranulation	2	/	721	0.0603196	0.999998	0.999998	1	/	10	0.00159363	ENSGALG00000011621	A0A1D5P7X1;F1NVD2	R-GGA-6798743
R-GGA-388396	GPCR downstream signalling	6	/	725	0.0606542	0.998473	0.998473	11	/	148	0.0235857	ENSGALG00000003839;ENSGALG00000007785;ENSGALG00000001383;ENSGALG00000026167;ENSGALG00000028519	F1NP50;A0A1D5PTL9;F1NJL4;F1NUD8;E1C8F2;R4GH78	R-GGA-749456;R-GGA-749454;R-GGA-380073;R-GGA-749452;R-GGA-379048;R-GGA-744887;R-GGA-744886;R-GGA-749448;R-GGA-379044;R-GGA-392295;R-GGA-392300
R-GGA-372790	Signaling by GPCR	6	/	746	0.0624111	0.998911	0.998911	14	/	272	0.0433466	ENSGALG00000003839;ENSGALG00000007785;ENSGALG00000001383;ENSGALG00000026167;ENSGALG00000028519	F1NP50;A0A1D5PTL9;F1NJL4;F1NUD8;E1C8F2;R4GH78	R-GGA-749456;R-GGA-749454;R-GGA-444691;R-GGA-749448;R-GGA-392295;R-GGA-392300;R-GGA-373075;R-GGA-380073;R-GGA-749452;R-GGA-379048;R-GGA-744887;R-GGA-744886;R-GGA-379044;R-GGA-390931
R-GGA-212436	Generic Transcription Pathway	5	/	763	0.0638333	0.999776	0.999776	3	/	188	0.0299602	ENSGALG00000031718;ENSGALG00000004370;ENSGALG00000003120	A0A1L1S0H7;A0A1D5PHN6;F1NVF2;P21869;E1C3T2	R-GGA-173481;R-GGA-8877691;R-GGA-8937989
R-GGA-556833	Metabolism of lipids	14	/	858	0.0717811	0.884594	0.884594	34	/	595	0.0948207	ENSGALG00000001314;ENSGALG00000002458;ENSGALG00000041687;ENSGALG00000002583;ENSGALG00000032149;ENSGALG00000026167;ENSGALG00000003120;ENSGALG00000018977;ENSGALG00000034939;ENSGALG00000012281;ENSGALG00000011328	A0A1D5P2S4;A0A1D5PM03;A0A1D5P566;F1NW93;A0A1D5PX69;F1NWG6;E1C3T2;F1NBV7;F1NUD8;F1NHX1;A0A1D5P6B2;A0A1D5PIW3;E1C9K4;F1P3I2	R-GGA-1482907;R-GGA-1602374;R-GGA-1676048;R-GGA-1602368;R-GGA-1482887;R-GGA-8867667;R-GGA-1655842;R-GGA-1482679;R-GGA-1482884;R-GGA-2314678;R-GGA-1676020;R-GGA-8869241;R-GGA-1655851;R-GGA-1482868;R-GGA-140355;R-GGA-1482856;R-GGA-140359;R-GGA-1676005;R-GGA-400183;R-GGA-400143;R-GGA-1606312;R-GGA-1482816;R-GGA-1655831;R-GGA-1676109;R-GGA-1605624;R-GGA-1676174;R-GGA-1482776;R-GGA-1602398;R-GGA-16023…
R-GGA-68886	M Phase	3	/	604	0.0505312	0.999816	0.999816	8	/	43	0.00685259	ENSGALG00000000433	F1NXR6;A0A1L1RJP8;A0A1L1RJ25	R-GGA-2484822;R-GGA-2467809;R-GGA-380316;R-GGA-1638803;R-GGA-380508;R-GGA-1638821;R-GGA-375302;R-GGA-2468287
R-GGA-1640170	Cell Cycle	5	/	888	0.074291	0.999977	0.999977	23	/	237	0.0377689	ENSGALG00000000433;ENSGALG00000006794	F1NXR6;A0A1L1RJP8;F1NEG1;A0A1D5P8T3;A0A1L1RJ25	R-GGA-2467809;R-GGA-380316;R-GGA-69891;R-GGA-1638821;R-GGA-8852298;R-GGA-8853419;R-GGA-8852306;R-GGA-375302;R-GGA-380311;R-GGA-2468287;R-GGA-8853405;R-GGA-2484822;R-GGA-3000319;R-GGA-3000310;R-GGA-1638803;R-GGA-5683735;R-GGA-8852280;R-GGA-380294;R-GGA-380508;R-GGA-380283;R-GGA-380455;R-GGA-380272;R-GGA-380303
R-GGA-1280218	Adaptive Immune System	5	/	786	0.0657576	0.999851	0.999851	5	/	99	0.0157769	ENSGALG00000041934;ENSGALG00000002583;ENSGALG00000001668	A0A1D5PIZ1;F1NHX1;A0A1L1S0T9;R4GIV8;A0A1L1RUL3	R-GGA-2045911;R-GGA-983140;R-GGA-983156;R-GGA-8940641;R-GGA-983157
R-GGA-199991	Membrane Trafficking	7	/	921	0.0770518	0.999792	0.999792	28	/	154	0.0245418	ENSGALG00000000433;ENSGALG00000011621;ENSGALG00000006045;ENSGALG00000012281	A0A1D5P7X1;F1NXR6;A0A1L1RJP8;F1NBV7;F1NVD2;A0A1L1RJ25;F1NB17	R-GGA-8868072;R-GGA-8866279;R-GGA-8868071;R-GGA-190520;R-GGA-8849353;R-GGA-421835;R-GGA-8849350;R-GGA-6814670;R-GGA-8871194;R-GGA-8871193;R-GGA-8867756;R-GGA-8866277;R-GGA-8868651;R-GGA-8868660;R-GGA-8868659;R-GGA-8868236;R-GGA-8868648;R-GGA-8868661;R-GGA-6811423;R-GGA-8868658;R-GGA-8868230;R-GGA-421831;R-GGA-6811426;R-GGA-6814675;R-GGA-6814671;R-GGA-6809003;R-GGA-8848484;R-GGA-6809006
R-GGA-72766	Translation	1	/	431	0.0360579	0.999917	0.999917	5	/	23	0.00366534	ENSGALG00000014387	H9L0I5	R-GGA-5419261;R-GGA-5419271;R-GGA-5419264;R-GGA-5419281;R-GGA-5419273
R-GGA-5653656	Vesicle-mediated transport	8	/	953	0.0797289	0.999599	0.999599	33	/	170	0.0270916	ENSGALG00000000433;ENSGALG00000011621;ENSGALG00000006045;ENSGALG00000022586;ENSGALG00000012281	A0A1D5P7X1;F1NXR6;A0A1L1RJP8;H9L385;F1NBV7;F1NVD2;A0A1L1RJ25;F1NB17	R-GGA-8868072;R-GGA-8866279;R-GGA-8868071;R-GGA-2168897;R-GGA-190520;R-GGA-2230983;R-GGA-2168887;R-GGA-8849353;R-GGA-2168886;R-GGA-421835;R-GGA-2168884;R-GGA-8849350;R-GGA-6814670;R-GGA-8871194;R-GGA-8871193;R-GGA-8867756;R-GGA-8866277;R-GGA-8868651;R-GGA-8868660;R-GGA-8868659;R-GGA-8868236;R-GGA-8868648;R-GGA-8868661;R-GGA-6811423;R-GGA-8868658;R-GGA-8868230;R-GGA-421831;R-GGA-6811426;R-GGA-6814…
R-GGA-8953854	Metabolism of RNA	4	/	953	0.0797289	0.999999	0.999999	7	/	72	0.0114741	ENSGALG00000012364;ENSGALG00000021679;ENSGALG00000039917	A0A1D5PLG0;E1C3R0;Q66VY4;A0A1D5PTP8	R-GGA-72139;R-GGA-6791222;R-GGA-450488;R-GGA-72143;R-GGA-450422;R-GGA-156661;R-GGA-430028
R-GGA-73857	RNA Polymerase II Transcription	5	/	970	0.0811512	0.999995	0.999995	3	/	237	0.0377689	ENSGALG00000031718;ENSGALG00000004370;ENSGALG00000003120	A0A1L1S0H7;A0A1D5PHN6;F1NVF2;P21869;E1C3T2	R-GGA-173481;R-GGA-8877691;R-GGA-8937989
R-GGA-69278	Cell Cycle, Mitotic	3	/	808	0.0675981	0.999997	0.999997	21	/	195	0.0310757	ENSGALG00000000433	F1NXR6;A0A1L1RJP8;A0A1L1RJ25	R-GGA-2467809;R-GGA-380316;R-GGA-1638821;R-GGA-8852298;R-GGA-8853419;R-GGA-8852306;R-GGA-375302;R-GGA-380311;R-GGA-2468287;R-GGA-8853405;R-GGA-2484822;R-GGA-3000319;R-GGA-3000310;R-GGA-1638803;R-GGA-8852280;R-GGA-380294;R-GGA-380508;R-GGA-380283;R-GGA-380455;R-GGA-380272;R-GGA-380303
R-GGA-382551	Transport of small molecules	4	/	987	0.0825734	0.999999	0.999999	2	/	336	0.0535458	ENSGALG00000002453;ENSGALG00000004333	A0A1D5PI29;F1NWH0;A0A1D5P2Y4;E1BY40	R-GGA-382553;R-GGA-8848053
R-GGA-74160	Gene expression (Transcription)	15	/	1185	0.0991383	0.992331	0.992331	8	/	281	0.0447809	ENSGALG00000031718;ENSGALG00000004370;ENSGALG00000011652;ENSGALG00000006068;ENSGALG00000003120	A0A1D5PHN6;A0A1D5PMS7;A0A1D5NWY7;E1C3T2;F1NAU7;A0A1D5NVT7;A0A1D5NX27;A0A1D5PQM8;A0A1L1S0H7;A0A1L1RWL8;F1NVF2;A0A1D5P5G9;P21869;F1NT44;A0A1D5PGM3	R-GGA-173481;R-GGA-5578965;R-GGA-8877691;R-GGA-426489;R-GGA-8937989;R-GGA-9023909;R-GGA-426522;R-GGA-5578966
R-GGA-168249	Innate Immune System	7	/	1223	0.102317	0.999999	0.999999	8	/	286	0.0455777	ENSGALG00000004370;ENSGALG00000011621;ENSGALG00000018977;ENSGALG00000012281	A0A1L1S0H7;A0A1D5P7X1;A0A1D5PHN6;F1NVF2;F1NBV7;E1C9K4;F1NVD2	R-GGA-727819;R-GGA-450333;R-GGA-2029475;R-GGA-450346;R-GGA-6798743;R-GGA-8862771;R-GGA-1247960;R-GGA-450296
R-GGA-597592	Post-translational protein modification	19	/	1768	0.147913	0.999894	0.999894	12	/	301	0.0479681	ENSGALG00000039219;ENSGALG00000004460;ENSGALG00000000433;ENSGALG00000039942;ENSGALG00000011816;ENSGALG00000006824;ENSGALG00000006802	Q5ZIZ6;F1NQ88;A0A1D5NWW3;A0A1L1RJP8;F1NES4;A0A1D5P4L2;A0A1D5PGG9;A0A1D5P4Q9;A0A1D5P958;A0A1D5NYS7;E1C700;F1NXR6;A0A1D5PVM8;F1NSF2;A0A1D5PMA9;A0A1D5PHP0;F1NLP8;A0A1D5PJM2;A0A1L1RJ25	R-GGA-8867370;R-GGA-5173005;R-GGA-3108203;R-GGA-6781797;R-GGA-8952289;R-GGA-8865774;R-GGA-8853379;R-GGA-5173192;R-GGA-5689630;R-GGA-6809003;R-GGA-6781814;R-GGA-6809006
R-GGA-168256	Immune System	15	/	1978	0.165481	1	1	30	/	687	0.109482	ENSGALG00000004370;ENSGALG00000041934;ENSGALG00000007253;ENSGALG00000011621;ENSGALG00000029940;ENSGALG00000002583;ENSGALG00000018977;ENSGALG00000012281;ENSGALG00000001668	A0A1D5P7X1;A0A1D5P4U4;A0A1D5PHN6;A0A1L1S0T9;F1NBV7;F1NVD2;R4GIV8;A0A1L1RUL3;E1C117;A0A1L1S0H7;A0A1D5PIZ1;F1NHX1;F1NVF2;O73909;E1C9K4	R-GGA-727819;R-GGA-450333;R-GGA-446868;R-GGA-445753;R-GGA-445752;R-GGA-2029475;R-GGA-450133;R-GGA-446694;R-GGA-450296;R-GGA-446862;R-GGA-446701;R-GGA-8940641;R-GGA-446684;R-GGA-448703;R-GGA-983140;R-GGA-446130;R-GGA-8862771;R-GGA-912627;R-GGA-879917;R-GGA-446648;R-GGA-446634;R-GGA-914182;R-GGA-450346;R-GGA-449058;R-GGA-2045911;R-GGA-507719;R-GGA-6798743;R-GGA-983156;R-GGA-1247960;R-GGA-983157
R-GGA-392499	Metabolism of proteins	20	/	2389	0.199866	1	1	17	/	411	0.065498	ENSGALG00000039219;ENSGALG00000004460;ENSGALG00000000433;ENSGALG00000014387;ENSGALG00000039942;ENSGALG00000011816;ENSGALG00000006824;ENSGALG00000006802	H9L0I5;Q5ZIZ6;F1NQ88;A0A1D5NWW3;A0A1L1RJP8;F1NES4;A0A1D5P4L2;A0A1D5PGG9;A0A1D5P4Q9;A0A1D5P958;A0A1D5NYS7;E1C700;F1NXR6;A0A1D5PVM8;F1NSF2;A0A1D5PMA9;A0A1D5PHP0;F1NLP8;A0A1D5PJM2;A0A1L1RJ25	R-GGA-8867370;R-GGA-5419261;R-GGA-3108203;R-GGA-6781797;R-GGA-5419281;R-GGA-5173192;R-GGA-5689630;R-GGA-5419273;R-GGA-5173005;R-GGA-8952289;R-GGA-8865774;R-GGA-5419271;R-GGA-5419264;R-GGA-8853379;R-GGA-6809003;R-GGA-6781814;R-GGA-6809006
R-GGA-1430728	Metabolism	24	/	2548	0.213168	1	1	45	/	1502	0.239363	ENSGALG00000030925;ENSGALG00000001314;ENSGALG00000002458;ENSGALG00000023437;ENSGALG00000012281;ENSGALG00000005626;ENSGALG00000041419;ENSGALG00000008385;ENSGALG00000040247;ENSGALG00000041687;ENSGALG00000002583;ENSGALG00000032149;ENSGALG00000026167;ENSGALG00000003120;ENSGALG00000018977;ENSGALG00000034939;ENSGALG00000011328	Q7T048;A0A1D5P2S4;A0A1D5PM03;F1NW93;A0A1D5P566;A0A1D5PR69;A0A1D5PII5;A0A1D5P534;A0A1D5PX69;F1NWG6;E1C3T2;F1NBV7;F1NUD8;A0A1L1RZ33;F1NGS3;A0A1D5PU08;E1BYW3;F1NHX1;A0A1D5P6B2;A0A1D5PIW3;E1BXR8;A0A1D5P3Z0;E1C9K4;F1P3I2	R-GGA-8954262;R-GGA-1482907;R-GGA-1602374;R-GGA-1676048;R-GGA-1602368;R-GGA-1482887;R-GGA-8867667;R-GGA-1655842;R-GGA-350578;R-GGA-1482679;R-GGA-1482884;R-GGA-2314678;R-GGA-1676020;R-GGA-8869241;R-GGA-1655851;R-GGA-1482868;R-GGA-1855182;R-GGA-140355;R-GGA-8936849;R-GGA-1482856;R-GGA-140359;R-GGA-1676005;R-GGA-400183;R-GGA-400143;R-GGA-1606312;R-GGA-2090079;R-GGA-1482816;R-GGA-1855216;R-GGA-165583…
R-GGA-162582	Signal Transduction	30	/	2785	0.232996	0.999999	0.999999	53	/	1298	0.206853	ENSGALG00000046068;ENSGALG00000000699;ENSGALG00000000433;ENSGALG00000003839;ENSGALG00000001828;ENSGALG00000034196;ENSGALG00000006802;ENSGALG00000028519;ENSGALG00000031440;ENSGALG00000006045;ENSGALG00000007785;ENSGALG00000039942;ENSGALG00000002583;ENSGALG00000001383;ENSGALG00000026167;ENSGALG00000003120;ENSGALG00000030847	A0A1D5PEC1;F1NP50;Q5ZIZ6;F1NJL4;A0A1D5NXU4;A0A1D5P4L2;A0A1D5PGG9;A0A1D5NYS7;F1NB17;A0A1D5NWK0;R4GH78;A0A1D5P8K6;A0A1D5PTL9;F1NXR6;E1C3L4;E1C8F2;A0A1D5PI26;A0A1D5P4W3;A0A1D5NX70;A0A1L1RJP8;A0A1L1RVX8;E1C3T2;F1NFS1;F1NUD8;E1C700;A0A1D5PVM8;F1NHX1;A0A1D5PMA9;A0A1D5PAN8;A0A1L1RJ25	R-GGA-5140747;R-GGA-5334050;R-GGA-1433423;R-GGA-379048;R-GGA-379044;R-GGA-8875482;R-GGA-3247844;R-GGA-5140741;R-GGA-390931;R-GGA-3247843;R-GGA-6807134;R-GGA-8875490;R-GGA-3247837;R-GGA-173481;R-GGA-3247840;R-GGA-2316434;R-GGA-1504186;R-GGA-3965447;R-GGA-375302;R-GGA-3965444;R-GGA-380073;R-GGA-9021627;R-GGA-3781941;R-GGA-1433506;R-GGA-3781943;R-GGA-5672329;R-GGA-8867047;R-GGA-205319;R-GGA-182986;R…

## Sheet: SW_pathways
PATHWAY		ENTITIES						REACTIONS				Submitted entities found	Mapped entities	Found reaction identifiers
Identifier	Name	Found		Total	Ratio	pValue	FDR	Found		Total	Ratio
R-GGA-5576891	Cardiac conduction	7	/	20	0.0133021	0.00570096	0.0816101	1	/	16	0.0025498	ENSGALG00000000329	A0A1L1RZ16;A0A1D5PYI1;A0A1D5P3D5;F1NUT5;A0A1D5P9U4;A0A1D5PGQ5;A0A1L1RS05	R-GGA-5226904
R-GGA-163765	ChREBP activates metabolic gene expression	4	/	21	0.00175688	0.000196604	0.0147262	1	/	4	0.00063745	ENSGALG00000040896	A0A1D5P842;A0A1D5P6Q5;A0A1D5PS28;A0A1L1RKS2	R-GGA-163733
R-GGA-5620922	BBSome-mediated cargo-targeting to cilium	4	/	22	0.00184054	0.000234389	0.0147262	2	/	4	0.00063745	ENSGALG00000019215	A0A1L1RMR6;Q5ZI75;A0A1D5PWK2;F1NSK2	R-GGA-5624127;R-GGA-5624126
R-GGA-5578775	Ion homeostasis	7	/	95	0.0079478	0.000312151	0.0147262	1	/	10	0.00159363	ENSGALG00000000329	A0A1L1RZ16;A0A1D5PYI1;A0A1D5P3D5;F1NUT5;A0A1D5P9U4;A0A1D5PGQ5;A0A1L1RS05	R-GGA-5226904
R-GGA-426117	Cation-coupled Chloride cotransporters	3	/	11	0.000920271	0.000460194	0.0147262	1	/	3	0.000478088	ENSGALG00000042199	A0A1D5PP15;A0A1D5NV36;A0A1D5PPW3	R-GGA-426155
R-GGA-75108	Activation, myristolyation of BID and translocation to mitochondria	3	/	11	0.000920271	0.000460194	0.0147262	1	/	4	0.00063745	ENSGALG00000000857	A0A1L1RKT0;F1NDA0;A0A1L1RUA4	R-GGA-141367
R-GGA-199220	Vitamin B5 (pantothenate) metabolism	4	/	29	0.00242617	0.000658572	0.0177815	1	/	10	0.00159363	ENSGALG00000040896	A0A1D5P842;A0A1D5P6Q5;A0A1D5PS28;A0A1L1RKS2	R-GGA-199202
R-GGA-75105	Fatty acyl-CoA biosynthesis	4	/	45	0.00376475	0.0032419	0.0661854	2	/	16	0.0025498	ENSGALG00000040896	A0A1D5P842;A0A1D5P6Q5;A0A1D5PS28;A0A1L1RKS2	R-GGA-75872;R-GGA-163756
R-GGA-3928664	Ephrin signaling	3	/	22	0.00184054	0.00330927	0.0661854	5	/	8	0.0012749	ENSGALG00000023703	Q9DG15;A0A1D5PI31;A0A1D5P926	R-GGA-3928641;R-GGA-3928625;R-GGA-3928614;R-GGA-3928633;R-GGA-3928631
R-GGA-2514859	Inactivation, recovery and regulation of the phototransduction cascade	3	/	23	0.0019242	0.00374502	0.0674104	1	/	9	0.00143426	ENSGALG00000000857	A0A1L1RKT0;F1NDA0;A0A1L1RUA4	R-GGA-2534087
R-GGA-432722	Golgi Associated Vesicle Biogenesis	3	/	71	0.00593993	0.0698258	0.289961	2	/	3	0.000478088	ENSGALG00000026796	A0A1D5P9J2;R4GG77;A0A1D5PBP9	R-GGA-421831;R-GGA-421835
R-GGA-2514856	The phototransduction cascade	3	/	27	0.00225885	0.00582929	0.0816101	1	/	13	0.00207171	ENSGALG00000000857	A0A1L1RKT0;F1NDA0;A0A1L1RUA4	R-GGA-2534087
R-GGA-109606	Intrinsic Pathway for Apoptosis	3	/	28	0.00234251	0.006439	0.0837071	1	/	21	0.00334661	ENSGALG00000000857	A0A1L1RKT0;F1NDA0;A0A1L1RUA4	R-GGA-141367
R-GGA-5627123	RHO GTPases activate PAKs	3	/	33	0.00276081	0.0100468	0.120561	2	/	10	0.00159363	ENSGALG00000008073	A0A1D5P9T0;Q6RW63;Q5ZJB0	R-GGA-5669158;R-GGA-2029456
R-GGA-211994	Sterols are 12-hydroxylated by CYP8B1	1	/	1	8.3661e-05	0.0132146	0.132695	3	/	3	0.000478088	ENSGALG00000033511	A0A1D5NVP2	R-GGA-192157;R-GGA-193845;R-GGA-193709
R-GGA-112411	MAPK1 (ERK2) activation	2	/	13	0.00108759	0.0132695	0.132695	1	/	3	0.000478088	ENSGALG00000030407	A0A1D5PXB4;A0A1D5PM65	R-GGA-109858
R-GGA-5620920	Cargo trafficking to the periciliary membrane	4	/	72	0.00602359	0.0161606	0.161606	2	/	25	0.00398406	ENSGALG00000019215	A0A1L1RMR6;Q5ZI75;A0A1D5PWK2;F1NSK2	R-GGA-5624127;R-GGA-5624126
R-GGA-1059683	Interleukin-6 signaling	2	/	16	0.00133858	0.0195872	0.176285	16	/	18	0.00286853	ENSGALG00000030407	A0A1D5PXB4;A0A1D5PM65	R-GGA-1112708;R-GGA-1112565;R-GGA-1112755;R-GGA-1112727;R-GGA-1112514;R-GGA-1112703;R-GGA-1067640;R-GGA-1112690;R-GGA-1067688;R-GGA-1067676;R-GGA-1112604;R-GGA-1112510;R-GGA-1112602;R-GGA-1067651;R-GGA-1067667;R-GGA-1067659
R-GGA-201451	Signaling by BMP	3	/	44	0.00368108	0.0214385	0.192946	3	/	16	0.0025498	ENSGALG00000025898	A0A1D5PJL5;R4GHC9;A0A1D5PB14	R-GGA-201475;R-GGA-201821;R-GGA-202626
R-GGA-8940973	RUNX2 regulates osteoblast differentiation	1	/	2	0.000167322	0.0262556	0.210045	1	/	1	0.000159363	ENSGALG00000030879	A0A1D5P088	R-GGA-8877902
R-GGA-73772	RNA Polymerase I Promoter Escape	3	/	51	0.00426671	0.0312372	0.229592	1	/	1	0.000159363	ENSGALG00000005395	F1NXA7;A0A1L1RRA1;A0A1L1RZ31	R-GGA-73769
R-GGA-73863	RNA Polymerase I Transcription Termination	3	/	52	0.00435037	0.0327988	0.229592	1	/	1	0.000159363	ENSGALG00000005395	F1NXA7;A0A1L1RRA1;A0A1L1RZ31	R-GGA-74993
R-GGA-6783589	Interleukin-6 family signaling	2	/	23	0.0019242	0.0381166	0.266816	16	/	27	0.00430279	ENSGALG00000030407	A0A1D5PXB4;A0A1D5PM65	R-GGA-1112708;R-GGA-1112565;R-GGA-1112755;R-GGA-1112727;R-GGA-1112514;R-GGA-1112703;R-GGA-1067640;R-GGA-1112690;R-GGA-1067688;R-GGA-1067676;R-GGA-1112604;R-GGA-1112510;R-GGA-1112602;R-GGA-1067651;R-GGA-1067667;R-GGA-1067659
R-GGA-189200	Cellular hexose transport	2	/	23	0.0019242	0.0381166	0.266816	1	/	13	0.00207171	ENSGALG00000000703	E1C3K1;A0A1D5PQD1	R-GGA-8875902
R-GGA-2187338	Visual phototransduction	3	/	62	0.00518698	0.0505878	0.283364	1	/	51	0.00812749	ENSGALG00000000857	A0A1L1RKT0;F1NDA0;A0A1L1RUA4	R-GGA-2534087
R-GGA-8941326	RUNX2 regulates bone development	1	/	4	0.000334644	0.0518261	0.283364	1	/	2	0.000318725	ENSGALG00000030879	A0A1D5P088	R-GGA-8877902
R-GGA-73777	RNA Polymerase I Chain Elongation	3	/	64	0.0053543	0.0546072	0.283364	1	/	1	0.000159363	ENSGALG00000005395	F1NXA7;A0A1L1RRA1;A0A1L1RZ31	R-GGA-74986
R-GGA-5250924	B-WICH complex positively regulates rRNA expression	3	/	65	0.00543797	0.0566727	0.283364	3	/	3	0.000478088	ENSGALG00000005395	F1NXA7;A0A1L1RRA1;A0A1L1RZ31	R-GGA-5250947;R-GGA-5250930;R-GGA-5250938
R-GGA-5250913	Positive epigenetic regulation of rRNA expression	3	/	65	0.00543797	0.0566727	0.283364	3	/	3	0.000478088	ENSGALG00000005395	F1NXA7;A0A1L1RRA1;A0A1L1RZ31	R-GGA-5250947;R-GGA-5250930;R-GGA-5250938
R-GGA-112409	RAF-independent MAPK1/3 activation	2	/	31	0.00259349	0.064689	0.289961	1	/	9	0.00143426	ENSGALG00000030407	A0A1D5PXB4;A0A1D5PM65	R-GGA-109858
R-GGA-397014	Muscle contraction	7	/	272	0.0227558	0.0724903	0.289961	1	/	26	0.00414343	ENSGALG00000000329	A0A1L1RZ16;A0A1D5PYI1;A0A1D5P3D5;F1NUT5;A0A1D5P9U4;A0A1D5PGQ5;A0A1L1RS05	R-GGA-5226904
R-GGA-6807505	RNA polymerase II transcribes snRNA genes	4	/	117	0.00978834	0.0719695	0.289961	5	/	8	0.0012749	ENSGALG00000014656	A0A1D5PV83;Q5ZJ28;A0A1D5P736;H9L0N7	R-GGA-6814885;R-GGA-6814555;R-GGA-6814549;R-GGA-6814559;R-GGA-6810235
R-GGA-73762	RNA Polymerase I Transcription Initiation	3	/	72	0.00602359	0.0721411	0.289961	2	/	4	0.00063745	ENSGALG00000005395	F1NXA7;A0A1L1RRA1;A0A1L1RZ31	R-GGA-73757;R-GGA-73758
R-GGA-421837	Clathrin derived vesicle budding	3	/	95	0.0079478	0.133945	0.408539	2	/	9	0.00143426	ENSGALG00000026796	A0A1D5P9J2;R4GG77;A0A1D5PBP9	R-GGA-421831;R-GGA-421835
R-GGA-2142850	Hyaluronan biosynthesis and export	1	/	7	0.000585627	0.0889359	0.355743	1	/	3	0.000478088	ENSGALG00000000630	F1NU27	R-GGA-2160851
R-GGA-73854	RNA Polymerase I Promoter Clearance	3	/	84	0.00702752	0.10247	0.408539	3	/	6	0.000956175	ENSGALG00000005395	F1NXA7;A0A1L1RRA1;A0A1L1RZ31	R-GGA-73757;R-GGA-73758;R-GGA-73769
R-GGA-212165	Epigenetic regulation of gene expression	3	/	85	0.00711119	0.105196	0.408539	3	/	9	0.00143426	ENSGALG00000005395	F1NXA7;A0A1L1RRA1;A0A1L1RZ31	R-GGA-5250947;R-GGA-5250930;R-GGA-5250938
R-GGA-163685	Integration of energy metabolism	4	/	135	0.0112942	0.106932	0.408539	1	/	28	0.00446215	ENSGALG00000040896	A0A1D5P842;A0A1D5P6Q5;A0A1D5PS28;A0A1L1RKS2	R-GGA-163733
R-GGA-73864	RNA Polymerase I Transcription	3	/	91	0.00761315	0.122135	0.408539	5	/	8	0.0012749	ENSGALG00000005395	F1NXA7;A0A1L1RRA1;A0A1L1RZ31	R-GGA-73757;R-GGA-74993;R-GGA-73758;R-GGA-73769;R-GGA-74986
R-GGA-199992	trans-Golgi Network Vesicle Budding	3	/	95	0.0079478	0.133945	0.408539	2	/	9	0.00143426	ENSGALG00000026796	A0A1D5P9J2;R4GG77;A0A1D5PBP9	R-GGA-421831;R-GGA-421835
R-GGA-1638091	Heparan sulfate/heparin (HS-GAG) metabolism	3	/	98	0.00819878	0.143054	0.429163	6	/	29	0.00462151	ENSGALG00000036484;ENSGALG00000006290;ENSGALG00000007508	A0A1D5P4J8;F1NW51;F1NM73	R-GGA-1889978;R-GGA-1878002;R-GGA-1889955;R-GGA-2076611;R-GGA-1678694;R-GGA-1889981
R-GGA-5627117	RHO GTPases Activate ROCKs	1	/	11	0.000920271	0.13618	0.408539	1	/	1	0.000159363	ENSGALG00000001569	Q9PSX7	R-GGA-419049
R-GGA-6798695	Neutrophil degranulation	13	/	721	0.0603196	0.16477	0.49431	3	/	10	0.00159363	ENSGALG00000011570	H9KZT7;A0A1L1RPP1;A0A1D5NT76;A0A1L1RLR9;A0A1L1RKI0;A0A1D5PIC2;A0A1L1RNK6;A0A1D5NVR8;A0A1L1RPI7;A0A1L1RZL5;A0A1L1RJV3;A0A1D5NWF8;A0A1L1RJ02	R-GGA-6798749;R-GGA-6798745;R-GGA-6800434
R-GGA-5625900	RHO GTPases activate CIT	1	/	12	0.00100393	0.147605	0.442815	1	/	1	0.000159363	ENSGALG00000001569	Q9PSX7	R-GGA-5671970
R-GGA-1630316	Glycosaminoglycan metabolism	4	/	184	0.0153936	0.230366	0.513219	19	/	74	0.0117928	ENSGALG00000000630;ENSGALG00000036484;ENSGALG00000006290;ENSGALG00000007508	A0A1D5P4J8;F1NW51;F1NM73;F1NU27	R-GGA-2022061;R-GGA-1971491;R-GGA-2018659;R-GGA-2018682;R-GGA-2022065;R-GGA-1971483;R-GGA-1889981;R-GGA-1971482;R-GGA-1971487;R-GGA-1889978;R-GGA-2022052;R-GGA-2022056;R-GGA-1878002;R-GGA-2160851;R-GGA-1889955;R-GGA-2022063;R-GGA-2022911;R-GGA-2076611;R-GGA-1678694
R-GGA-2022923	Dermatan sulfate biosynthesis	1	/	14	0.00117125	0.170007	0.510022	4	/	4	0.00063745	ENSGALG00000036484	A0A1D5P4J8	R-GGA-2022052;R-GGA-2022061;R-GGA-2022063;R-GGA-2022065
R-GGA-2029482	Regulation of actin dynamics for phagocytic cup formation	3	/	107	0.00895173	0.17153	0.513219	1	/	20	0.00318725	ENSGALG00000008073	A0A1D5P9T0;Q6RW63;Q5ZJB0	R-GGA-2029456
R-GGA-5625740	RHO GTPases activate PKNs	1	/	16	0.00133858	0.191825	0.513219	3	/	3	0.000478088	ENSGALG00000001569	Q9PSX7	R-GGA-5623667;R-GGA-5623632;R-GGA-5623622
R-GGA-193775	Synthesis of bile acids and bile salts via 24-hydroxycholesterol	1	/	18	0.0015059	0.213072	0.513219	1	/	16	0.0025498	ENSGALG00000033511	A0A1D5NVP2	R-GGA-193709
R-GGA-2029480	Fcgamma receptor (FCGR) dependent phagocytosis	3	/	131	0.0109596	0.253674	0.513219	1	/	30	0.00478088	ENSGALG00000008073	A0A1D5P9T0;Q6RW63;Q5ZJB0	R-GGA-2029456
R-GGA-193807	Synthesis of bile acids and bile salts via 27-hydroxycholesterol	1	/	21	0.00175688	0.243906	0.513219	1	/	6	0.000956175	ENSGALG00000033511	A0A1D5NVP2	R-GGA-193845
R-GGA-2682334	EPH-Ephrin signaling	3	/	129	0.0107923	0.246587	0.513219	5	/	38	0.00605578	ENSGALG00000023703	Q9DG15;A0A1D5PI31;A0A1D5P926	R-GGA-3928641;R-GGA-3928625;R-GGA-3928614;R-GGA-3928633;R-GGA-3928631
R-GGA-9006936	Signaling by TGF-beta family members	3	/	151	0.0126328	0.325667	0.513219	3	/	78	0.0124303	ENSGALG00000025898	A0A1D5PJL5;R4GHC9;A0A1D5PB14	R-GGA-201475;R-GGA-201821;R-GGA-202626
R-GGA-2022870	Chondroitin sulfate biosynthesis	1	/	22	0.00184054	0.253915	0.513219	7	/	7	0.00111554	ENSGALG00000036484	A0A1D5P4J8	R-GGA-1971491;R-GGA-2022911;R-GGA-2018659;R-GGA-2018682;R-GGA-1971483;R-GGA-1971482;R-GGA-1971487
R-GGA-416572	Sema4D induced cell migration and growth-cone collapse	1	/	23	0.0019242	0.263792	0.513219	2	/	4	0.00063745	ENSGALG00000001569	Q9PSX7	R-GGA-416588;R-GGA-419049
R-GGA-2024101	CS/DS degradation	1	/	23	0.0019242	0.263792	0.513219	1	/	7	0.00111554	ENSGALG00000036484	A0A1D5P4J8	R-GGA-2022056
R-GGA-9010553	Regulation of expression of SLITs and ROBOs	1	/	24	0.00200786	0.27354	0.513219	1	/	2	0.000318725	ENSGALG00000037784	A0A1D5PFK3	R-GGA-9010872
R-GGA-2142845	Hyaluronan metabolism	1	/	25	0.00209153	0.283159	0.513219	1	/	10	0.00159363	ENSGALG00000000630	F1NU27	R-GGA-2160851
R-GGA-109581	Apoptosis	3	/	140	0.0117125	0.285889	0.513219	1	/	79	0.0125896	ENSGALG00000000857	A0A1L1RKT0;F1NDA0;A0A1L1RUA4	R-GGA-141367
R-GGA-3000178	ECM proteoglycans	2	/	80	0.00669288	0.287909	0.513219	2	/	11	0.00175299	ENSGALG00000037784;ENSGALG00000036484	A0A1D5P4J8;A0A1D5PFK3	R-GGA-2396395;R-GGA-2424246
R-GGA-400685	Sema4D in semaphorin signaling	1	/	27	0.00225885	0.302019	0.513219	2	/	9	0.00143426	ENSGALG00000001569	Q9PSX7	R-GGA-416588;R-GGA-419049
R-GGA-5357801	Programmed Cell Death	3	/	145	0.0121308	0.30394	0.513219	1	/	82	0.0130677	ENSGALG00000000857	A0A1L1RKT0;F1NDA0;A0A1L1RUA4	R-GGA-141367
R-GGA-5617833	Cilium Assembly	5	/	316	0.0264369	0.411369	0.513219	5	/	40	0.0063745	ENSGALG00000019215;ENSGALG00000000966	A0A1L1RMR6;F1P3W6;Q5ZI75;A0A1D5PWK2;F1NSK2	R-GGA-5626681;R-GGA-5617816;R-GGA-5624127;R-GGA-5638009;R-GGA-5624126
R-GGA-196849	Metabolism of water-soluble vitamins and cofactors	4	/	217	0.0181544	0.32713	0.513219	1	/	113	0.018008	ENSGALG00000040896	A0A1D5P842;A0A1D5P6Q5;A0A1D5PS28;A0A1L1RKS2	R-GGA-199202
R-GGA-2672351	Stimuli-sensing channels	3	/	152	0.0127165	0.329291	0.513219	2	/	19	0.00302789	ENSGALG00000030826;ENSGALG00000032191	A0A1D5PVS4;A0A1D5PP90;A0A1D5PS57	R-GGA-2682349;R-GGA-2730959
R-GGA-425393	Transport of inorganic cations/anions and amino acids/oligopeptides	3	/	152	0.0127165	0.329291	0.513219	1	/	66	0.0105179	ENSGALG00000042199	A0A1D5PP15;A0A1D5NV36;A0A1D5PPW3	R-GGA-426155
R-GGA-2028269	Signaling by Hippo	1	/	31	0.00259349	0.338272	0.513219	1	/	27	0.00430279	ENSGALG00000000966	F1P3W6	R-GGA-2059926
R-GGA-425407	SLC-mediated transmembrane transport	5	/	298	0.024931	0.364036	0.513219	2	/	149	0.023745	ENSGALG00000042199;ENSGALG00000000703	E1C3K1;A0A1D5PP15;A0A1D5NV36;A0A1D5PQD1;A0A1D5PPW3	R-GGA-426155;R-GGA-8875902
R-GGA-193368	Synthesis of bile acids and bile salts via 7alpha-hydroxycholesterol	1	/	34	0.00284447	0.364228	0.513219	1	/	27	0.00430279	ENSGALG00000033511	A0A1D5NVP2	R-GGA-192157
R-GGA-3000157	Laminin interactions	1	/	42	0.00351376	0.428604	0.513219	1	/	6	0.000956175	ENSGALG00000038311	A0A1D5P5M7	R-GGA-4084507
R-GGA-442729	CREB phosphorylation through the activation of CaMKII	1	/	40	0.00334644	0.413144	0.513219	1	/	4	0.00063745	ENSGALG00000027415	R4GFN5	R-GGA-445367
R-GGA-442982	Ras activation upon Ca2+ influx through NMDA receptor	1	/	41	0.0034301	0.420925	0.513219	2	/	2	0.000318725	ENSGALG00000027415	R4GFN5	R-GGA-442760;R-GGA-442732
R-GGA-211976	Endogenous sterols	1	/	41	0.0034301	0.420925	0.513219	3	/	15	0.00239044	ENSGALG00000033511	A0A1D5NVP2	R-GGA-192157;R-GGA-193845;R-GGA-193709
R-GGA-8978868	Fatty acid metabolism	4	/	259	0.0216682	0.452565	0.513219	2	/	154	0.0245418	ENSGALG00000040896	A0A1D5P842;A0A1D5P6Q5;A0A1D5PS28;A0A1L1RKS2	R-GGA-75872;R-GGA-163756
R-GGA-196854	Metabolism of vitamins and cofactors	4	/	251	0.0209989	0.429011	0.513219	1	/	146	0.0232669	ENSGALG00000040896	A0A1D5P842;A0A1D5P6Q5;A0A1D5PS28;A0A1L1RKS2	R-GGA-199202
R-GGA-2024096	HS-GAG degradation	1	/	49	0.00409939	0.479592	0.513219	1	/	14	0.00223108	ENSGALG00000007508	F1NM73	R-GGA-1678694
R-GGA-6783310	Fanconi Anemia Pathway	1	/	46	0.00384841	0.458318	0.513219	6	/	9	0.00143426	ENSGALG00000043607	A0A1D5PAJ6	R-GGA-6785361;R-GGA-6785342;R-GGA-6786166;R-GGA-6788392;R-GGA-6788385;R-GGA-6786171
R-GGA-438066	Unblocking of NMDA receptors, glutamate binding and activation	1	/	46	0.00384841	0.458318	0.513219	1	/	2	0.000318725	ENSGALG00000027415	R4GFN5	R-GGA-432164
R-GGA-192105	Synthesis of bile acids and bile salts	1	/	55	0.00460136	0.519681	0.519681	3	/	53	0.00844622	ENSGALG00000033511	A0A1D5NVP2	R-GGA-192157;R-GGA-193845;R-GGA-193709
R-GGA-1971475	A tetrasaccharide linker sequence is required for GAG synthesis	1	/	50	0.00418305	0.486497	0.513219	4	/	4	0.00063745	ENSGALG00000036484	A0A1D5P4J8	R-GGA-1889978;R-GGA-1878002;R-GGA-1889955;R-GGA-1889981
R-GGA-1592389	Activation of Matrix Metalloproteinases	1	/	52	0.00435037	0.500035	0.513219	3	/	21	0.00334661	ENSGALG00000038311	A0A1D5P5M7	R-GGA-1604722;R-GGA-1604732;R-GGA-1592278
R-GGA-606279	Deposition of new CENPA-containing nucleosomes at the centromere	1	/	54	0.00451769	0.513219	0.513219	3	/	3	0.000478088	ENSGALG00000043607	A0A1D5PAJ6	R-GGA-606287;R-GGA-606349;R-GGA-606326
R-GGA-774815	Nucleosome assembly	1	/	54	0.00451769	0.513219	0.513219	3	/	3	0.000478088	ENSGALG00000043607	A0A1D5PAJ6	R-GGA-606287;R-GGA-606349;R-GGA-606326
R-GGA-442742	CREB phosphorylation through the activation of Ras	1	/	54	0.00451769	0.513219	0.513219	2	/	7	0.00111554	ENSGALG00000027415	R4GFN5	R-GGA-442760;R-GGA-442732
R-GGA-525793	Myogenesis	1	/	54	0.00451769	0.513219	0.513219	1	/	5	0.000796813	ENSGALG00000033770	A0A1D5PM25	R-GGA-448963
R-GGA-375170	CDO in myogenesis	1	/	54	0.00451769	0.513219	0.513219	1	/	5	0.000796813	ENSGALG00000033770	A0A1D5PM25	R-GGA-448963
R-GGA-1852241	Organelle biogenesis and maintenance	5	/	368	0.0307873	0.543433	0.543433	5	/	45	0.00717131	ENSGALG00000019215;ENSGALG00000000966	A0A1L1RMR6;F1P3W6;Q5ZI75;A0A1D5PWK2;F1NSK2	R-GGA-5626681;R-GGA-5617816;R-GGA-5624127;R-GGA-5638009;R-GGA-5624126
R-GGA-376176	Signaling by ROBO receptors	1	/	58	0.00485234	0.538558	0.538558	1	/	15	0.00239044	ENSGALG00000037784	A0A1D5PFK3	R-GGA-9010872
R-GGA-168249	Innate Immune System	16	/	1223	0.102317	0.566389	0.566389	4	/	286	0.0455777	ENSGALG00000011570;ENSGALG00000008073	H9KZT7;A0A1L1RPP1;A0A1D5NT76;A0A1L1RLR9;A0A1D5P9T0;A0A1L1RKI0;A0A1D5PIC2;A0A1L1RNK6;A0A1D5NVR8;Q5ZJB0;A0A1L1RPI7;A0A1L1RZL5;A0A1L1RJV3;A0A1D5NWF8;A0A1L1RJ02;Q6RW63	R-GGA-6798749;R-GGA-6798745;R-GGA-2029456;R-GGA-6800434
R-GGA-2022928	HS-GAG biosynthesis	1	/	59	0.004936	0.544686	0.544686	1	/	11	0.00175299	ENSGALG00000006290	F1NW51	R-GGA-2076611
R-GGA-194068	Bile acid and bile salt metabolism	1	/	64	0.0053543	0.57413	0.57413	3	/	63	0.0100398	ENSGALG00000033511	A0A1D5NVP2	R-GGA-192157;R-GGA-193845;R-GGA-193709
R-GGA-8948216	Collagen chain trimerization	1	/	63	0.00527064	0.568397	0.568397	1	/	25	0.00398406	ENSGALG00000038311	A0A1D5P5M7	R-GGA-8944230
R-GGA-422475	Axon guidance	5	/	398	0.0332971	0.613143	0.613143	8	/	128	0.0203984	ENSGALG00000037784;ENSGALG00000023703;ENSGALG00000001569	Q9DG15;A0A1D5PI31;Q9PSX7;A0A1D5PFK3;A0A1D5P926	R-GGA-416588;R-GGA-419049;R-GGA-3928641;R-GGA-3928625;R-GGA-3928614;R-GGA-9010872;R-GGA-3928633;R-GGA-3928631
R-GGA-438064	Post NMDA receptor activation events	1	/	65	0.00543797	0.579788	0.579788	3	/	15	0.00239044	ENSGALG00000027415	R4GFN5	R-GGA-442760;R-GGA-442732;R-GGA-445367
R-GGA-983712	Ion channel transport	3	/	237	0.0198277	0.612568	0.612568	2	/	32	0.0050996	ENSGALG00000030826;ENSGALG00000032191	A0A1D5PVS4;A0A1D5PP90;A0A1D5PS57	R-GGA-2682349;R-GGA-2730959
R-GGA-71387	Metabolism of carbohydrates	4	/	363	0.0303689	0.714324	0.714324	19	/	170	0.0270916	ENSGALG00000000630;ENSGALG00000036484;ENSGALG00000006290;ENSGALG00000007508	A0A1D5P4J8;F1NW51;F1NM73;F1NU27	R-GGA-2022061;R-GGA-1971491;R-GGA-2018659;R-GGA-2018682;R-GGA-2022065;R-GGA-1971483;R-GGA-1889981;R-GGA-1971482;R-GGA-1971487;R-GGA-1889978;R-GGA-2022052;R-GGA-2022056;R-GGA-1878002;R-GGA-2160851;R-GGA-1889955;R-GGA-2022063;R-GGA-2022911;R-GGA-2076611;R-GGA-1678694
R-GGA-383280	Nuclear Receptor transcription pathway	1	/	73	0.00610725	0.622442	0.622442	1	/	1	0.000159363	ENSGALG00000030879	A0A1D5P088	R-GGA-376419
R-GGA-442755	Activation of NMDA receptors and postsynaptic events	1	/	75	0.00627458	0.632415	0.632415	4	/	17	0.00270916	ENSGALG00000027415	R4GFN5	R-GGA-442760;R-GGA-442732;R-GGA-432164;R-GGA-445367
R-GGA-1793185	Chondroitin sulfate/dermatan sulfate metabolism	1	/	79	0.00660922	0.651583	0.651583	16	/	22	0.00350598	ENSGALG00000036484	A0A1D5P4J8	R-GGA-2022061;R-GGA-1971491;R-GGA-2018659;R-GGA-2018682;R-GGA-2022065;R-GGA-1971483;R-GGA-1889981;R-GGA-1971482;R-GGA-1971487;R-GGA-1889978;R-GGA-2022052;R-GGA-2022056;R-GGA-1878002;R-GGA-1889955;R-GGA-2022063;R-GGA-2022911
R-GGA-2022090	Assembly of collagen fibrils and other multimeric structures	1	/	80	0.00669288	0.656217	0.656217	1	/	23	0.00366534	ENSGALG00000038311	A0A1D5P5M7	R-GGA-2213200
R-GGA-1442490	Collagen degradation	1	/	83	0.00694386	0.669757	0.669757	2	/	19	0.00302789	ENSGALG00000038311	A0A1D5P5M7	R-GGA-2471621;R-GGA-2168923
R-GGA-211897	Cytochrome P450 - arranged by substrate type	1	/	83	0.00694386	0.669757	0.669757	3	/	51	0.00812749	ENSGALG00000033511	A0A1D5NVP2	R-GGA-192157;R-GGA-193845;R-GGA-193709
R-GGA-373755	Semaphorin interactions	1	/	84	0.00702752	0.674151	0.674151	2	/	23	0.00366534	ENSGALG00000001569	Q9PSX7	R-GGA-416588;R-GGA-419049
R-GGA-72165	mRNA Splicing - Minor Pathway	1	/	91	0.00761315	0.703326	0.703326	4	/	4	0.00063745	ENSGALG00000000988	Q5F3X4	R-GGA-75083;R-GGA-75081;R-GGA-75082;R-GGA-75079
R-GGA-1266738	Developmental Biology	6	/	549	0.0459299	0.742599	0.742599	9	/	159	0.0253386	ENSGALG00000033770;ENSGALG00000037784;ENSGALG00000023703;ENSGALG00000001569	A0A1D5PM25;Q9DG15;A0A1D5PI31;Q9PSX7;A0A1D5PFK3;A0A1D5P926	R-GGA-416588;R-GGA-419049;R-GGA-3928641;R-GGA-448963;R-GGA-3928625;R-GGA-3928614;R-GGA-9010872;R-GGA-3928633;R-GGA-3928631
R-GGA-8878166	Transcriptional regulation by RUNX2	1	/	95	0.0079478	0.718817	0.718817	1	/	9	0.00143426	ENSGALG00000030879	A0A1D5P088	R-GGA-8877902
R-GGA-73886	Chromosome Maintenance	1	/	100	0.0083661	0.737054	0.737054	3	/	15	0.00239044	ENSGALG00000043607	A0A1D5PAJ6	R-GGA-606287;R-GGA-606349;R-GGA-606326
R-GGA-195258	RHO GTPase Effectors	4	/	381	0.0318748	0.748972	0.748972	8	/	55	0.00876494	ENSGALG00000008073;ENSGALG00000001569	A0A1D5P9T0;Q9PSX7;Q6RW63;Q5ZJB0	R-GGA-419049;R-GGA-5669158;R-GGA-5623667;R-GGA-5623632;R-GGA-5671970;R-GGA-5623622;R-GGA-5665748;R-GGA-2029456
R-GGA-3371497	HSP90 chaperone cycle for steroid hormone receptors (SHR)	1	/	107	0.00895173	0.760627	0.760627	3	/	12	0.00191235	ENSGALG00000030879	A0A1D5P088	R-GGA-5618099;R-GGA-5618080;R-GGA-5618093
R-GGA-216083	Integrin cell surface interactions	1	/	105	0.00878441	0.754115	0.754115	1	/	32	0.0050996	ENSGALG00000038311	A0A1D5P5M7	R-GGA-4088264
R-GGA-1650814	Collagen biosynthesis and modifying enzymes	1	/	117	0.00978834	0.790705	0.790705	14	/	43	0.00685259	ENSGALG00000038311	A0A1D5P5M7	R-GGA-2002460;R-GGA-1980233;R-GGA-1650808;R-GGA-8948234;R-GGA-8944230;R-GGA-2089971;R-GGA-8948226;R-GGA-1981120;R-GGA-2022073;R-GGA-1981104;R-GGA-8948232;R-GGA-8948231;R-GGA-8948230;R-GGA-8948228
R-GGA-418594	G alpha (i) signalling events	3	/	327	0.0273571	0.812772	0.812772	1	/	94	0.0149801	ENSGALG00000000857	A0A1L1RKT0;F1NDA0;A0A1L1RUA4	R-GGA-2534087
R-GGA-5173105	O-linked glycosylation	1	/	129	0.0107923	0.82188	0.82188	5	/	24	0.0038247	ENSGALG00000037784	A0A1D5PFK3	R-GGA-8879117;R-GGA-8931648;R-GGA-5617037;R-GGA-5615637;R-GGA-8931653
R-GGA-416482	G alpha (12/13) signalling events	1	/	126	0.0105413	0.814548	0.814548	2	/	9	0.00143426	ENSGALG00000001569	Q9PSX7	R-GGA-419166;R-GGA-419049
R-GGA-4420097	VEGFA-VEGFR2 Pathway	1	/	127	0.0106249	0.817025	0.817025	6	/	55	0.00876494	ENSGALG00000044505	A0A1L1RS36	R-GGA-5357479;R-GGA-5218819;R-GGA-4420143;R-GGA-5357429;R-GGA-4420140;R-GGA-4420206
R-GGA-1474290	Collagen formation	1	/	141	0.0117962	0.848436	0.848436	15	/	66	0.0105179	ENSGALG00000038311	A0A1D5P5M7	R-GGA-2002460;R-GGA-1980233;R-GGA-1650808;R-GGA-8948234;R-GGA-8944230;R-GGA-2089971;R-GGA-8948226;R-GGA-1981120;R-GGA-2022073;R-GGA-2213200;R-GGA-1981104;R-GGA-8948232;R-GGA-8948231;R-GGA-8948230;R-GGA-8948228
R-GGA-211945	Phase I - Functionalization of compounds	1	/	143	0.0119635	0.852462	0.852462	3	/	83	0.0132271	ENSGALG00000033511	A0A1D5NVP2	R-GGA-192157;R-GGA-193845;R-GGA-193709
R-GGA-194138	Signaling by VEGF	1	/	142	0.0118799	0.850462	0.850462	6	/	61	0.00972112	ENSGALG00000044505	A0A1L1RS36	R-GGA-5357479;R-GGA-5218819;R-GGA-4420143;R-GGA-5357429;R-GGA-4420140;R-GGA-4420206
R-GGA-72163	mRNA Splicing - Major Pathway	2	/	264	0.0220865	0.86827	0.86827	3	/	3	0.000478088	ENSGALG00000040696;ENSGALG00000000988	Q5F3X4;A0A1D5PXQ6	R-GGA-72139;R-GGA-72143;R-GGA-156661
R-GGA-8957322	Metabolism of steroids	1	/	161	0.0134694	0.884235	0.884235	3	/	136	0.0216733	ENSGALG00000033511	A0A1D5NVP2	R-GGA-192157;R-GGA-193845;R-GGA-193709
R-GGA-5684996	MAPK1/MAPK3 signaling	3	/	371	0.0310382	0.873791	0.873791	2	/	40	0.0063745	ENSGALG00000027415;ENSGALG00000030407	R4GFN5;A0A1D5PXB4;A0A1D5PM65	R-GGA-5672965;R-GGA-109858
R-GGA-72172	mRNA Splicing	2	/	277	0.0231741	0.88528	0.88528	7	/	7	0.00111554	ENSGALG00000040696;ENSGALG00000000988	Q5F3X4;A0A1D5PXQ6	R-GGA-72139;R-GGA-75083;R-GGA-72143;R-GGA-156661;R-GGA-75081;R-GGA-75082;R-GGA-75079
R-GGA-1474228	Degradation of the extracellular matrix	1	/	162	0.0135531	0.885785	0.885785	5	/	68	0.0108367	ENSGALG00000038311	A0A1D5P5M7	R-GGA-2471621;R-GGA-2168923;R-GGA-1604722;R-GGA-1604732;R-GGA-1592278
R-GGA-5620912	Anchoring of the basal body to the plasma membrane	1	/	170	0.0142224	0.897469	0.897469	3	/	7	0.00111554	ENSGALG00000000966	F1P3W6	R-GGA-5626681;R-GGA-5617816;R-GGA-5638009
R-GGA-1474244	Extracellular matrix organization	3	/	409	0.0342174	0.911675	0.911675	24	/	212	0.0337849	ENSGALG00000037784;ENSGALG00000038311;ENSGALG00000036484	A0A1D5P4J8;A0A1D5PFK3;A0A1D5P5M7	R-GGA-2471621;R-GGA-1604722;R-GGA-4084507;R-GGA-2002460;R-GGA-4088264;R-GGA-1980233;R-GGA-1650808;R-GGA-2168923;R-GGA-8948234;R-GGA-8944230;R-GGA-2089971;R-GGA-1604732;R-GGA-2396395;R-GGA-8948226;R-GGA-1981120;R-GGA-2424246;R-GGA-2022073;R-GGA-2213200;R-GGA-1981104;R-GGA-8948232;R-GGA-8948231;R-GGA-8948230;R-GGA-8948228;R-GGA-1592278
R-GGA-5683057	MAPK family signaling cascades	3	/	407	0.03405	0.909969	0.909969	2	/	67	0.0106773	ENSGALG00000027415;ENSGALG00000030407	R4GFN5;A0A1D5PXB4;A0A1D5PM65	R-GGA-5672965;R-GGA-109858
R-GGA-983231	Factors involved in megakaryocyte development and platelet production	1	/	207	0.0173178	0.937816	0.937816	1	/	28	0.00446215	ENSGALG00000005575	E1C1N8	R-GGA-992708
R-GGA-112314	Neurotransmitter receptors and postsynaptic signal transmission	1	/	203	0.0169832	0.934357	0.934357	4	/	45	0.00717131	ENSGALG00000027415	R4GFN5	R-GGA-442760;R-GGA-442732;R-GGA-432164;R-GGA-445367
R-GGA-449147	Signaling by Interleukins	2	/	350	0.0292814	0.948597	0.948597	16	/	270	0.0430279	ENSGALG00000030407	A0A1D5PXB4;A0A1D5PM65	R-GGA-1112708;R-GGA-1112565;R-GGA-1112755;R-GGA-1112727;R-GGA-1112514;R-GGA-1112703;R-GGA-1067640;R-GGA-1112690;R-GGA-1067688;R-GGA-1067676;R-GGA-1112604;R-GGA-1112510;R-GGA-1112602;R-GGA-1067651;R-GGA-1067667;R-GGA-1067659
R-GGA-5663220	RHO GTPases Activate Formins	1	/	226	0.0189074	0.951928	0.951928	1	/	12	0.00191235	ENSGALG00000001569	Q9PSX7	R-GGA-5665748
R-GGA-382551	Transport of small molecules	8	/	987	0.0825734	0.956188	0.956188	4	/	336	0.0535458	ENSGALG00000030826;ENSGALG00000032191;ENSGALG00000042199;ENSGALG00000000703	E1C3K1;A0A1D5PVS4;A0A1D5PP90;A0A1D5PP15;A0A1D5PS57;A0A1D5NV36;A0A1D5PQD1;A0A1D5PPW3	R-GGA-2682349;R-GGA-426155;R-GGA-2730959;R-GGA-8875902
R-GGA-211859	Biological oxidations	1	/	254	0.0212499	0.967128	0.967128	3	/	141	0.0224701	ENSGALG00000033511	A0A1D5NVP2	R-GGA-192157;R-GGA-193845;R-GGA-193709
R-GGA-194315	Signaling by Rho GTPases	4	/	633	0.0529574	0.9713	0.9713	12	/	59	0.00940239	ENSGALG00000008073;ENSGALG00000001569	A0A1D5P9T0;Q9PSX7;Q6RW63;Q5ZJB0	R-GGA-419049;R-GGA-195146;R-GGA-5669158;R-GGA-194854;R-GGA-194913;R-GGA-5623667;R-GGA-5623632;R-GGA-5671970;R-GGA-5623622;R-GGA-5665748;R-GGA-194922;R-GGA-2029456
R-GGA-72203	Processing of Capped Intron-Containing Pre-mRNA	2	/	403	0.0337154	0.971959	0.971959	7	/	11	0.00175299	ENSGALG00000040696;ENSGALG00000000988	Q5F3X4;A0A1D5PXQ6	R-GGA-72139;R-GGA-75083;R-GGA-72143;R-GGA-156661;R-GGA-75081;R-GGA-75082;R-GGA-75079
R-GGA-194840	Rho GTPase cycle	1	/	267	0.0223375	0.972455	0.972455	4	/	4	0.00063745	ENSGALG00000001569	Q9PSX7	R-GGA-195146;R-GGA-194854;R-GGA-194913;R-GGA-194922
R-GGA-5689880	Ub-specific processing proteases	1	/	270	0.0225885	0.973557	0.973557	1	/	31	0.00494024	ENSGALG00000030879	A0A1D5P088	R-GGA-5696605
R-GGA-168256	Immune System	18	/	1978	0.165481	0.974657	0.974657	20	/	687	0.109482	ENSGALG00000011570;ENSGALG00000030407;ENSGALG00000008073	H9KZT7;A0A1L1RPP1;A0A1D5NT76;A0A1L1RLR9;A0A1D5P9T0;A0A1L1RKI0;A0A1D5PIC2;A0A1L1RNK6;A0A1D5NVR8;Q5ZJB0;A0A1L1RPI7;A0A1L1RZL5;A0A1L1RJV3;A0A1D5PXB4;A0A1D5NWF8;A0A1D5PM65;A0A1L1RJ02;Q6RW63	R-GGA-1112708;R-GGA-1112565;R-GGA-1112755;R-GGA-1112727;R-GGA-1112514;R-GGA-1112703;R-GGA-2029456;R-GGA-1067640;R-GGA-1112690;R-GGA-1067688;R-GGA-1067676;R-GGA-1112604;R-GGA-1112510;R-GGA-6798749;R-GGA-1112602;R-GGA-6798745;R-GGA-1067651;R-GGA-1067667;R-GGA-1067659;R-GGA-6800434
R-GGA-1280215	Cytokine Signaling in Immune system	2	/	425	0.0355559	0.978299	0.978299	16	/	342	0.054502	ENSGALG00000030407	A0A1D5PXB4;A0A1D5PM65	R-GGA-1112708;R-GGA-1112565;R-GGA-1112755;R-GGA-1112727;R-GGA-1112514;R-GGA-1112703;R-GGA-1067640;R-GGA-1112690;R-GGA-1067688;R-GGA-1067676;R-GGA-1112604;R-GGA-1112510;R-GGA-1112602;R-GGA-1067651;R-GGA-1067667;R-GGA-1067659
R-GGA-388396	GPCR downstream signalling	4	/	725	0.0606542	0.988503	0.988503	3	/	148	0.0235857	ENSGALG00000000857;ENSGALG00000001569	A0A1L1RKT0;F1NDA0;A0A1L1RUA4;Q9PSX7	R-GGA-419166;R-GGA-419049;R-GGA-2534087
R-GGA-112315	Transmission across Chemical Synapses	1	/	314	0.0262696	0.985487	0.985487	4	/	79	0.0125896	ENSGALG00000027415	R4GFN5	R-GGA-442760;R-GGA-442732;R-GGA-432164;R-GGA-445367
R-GGA-556833	Metabolism of lipids	5	/	858	0.0717811	0.990593	0.990593	5	/	595	0.0948207	ENSGALG00000033511;ENSGALG00000040896	A0A1D5P842;A0A1D5P6Q5;A0A1D5PS28;A0A1D5NVP2;A0A1L1RKS2	R-GGA-75872;R-GGA-163756;R-GGA-192157;R-GGA-193845;R-GGA-193709
R-GGA-372790	Signaling by GPCR	4	/	746	0.0624111	0.990735	0.990735	3	/	272	0.0433466	ENSGALG00000000857;ENSGALG00000001569	A0A1L1RKT0;F1NDA0;A0A1L1RUA4;Q9PSX7	R-GGA-419166;R-GGA-419049;R-GGA-2534087
R-GGA-74160	Gene expression (Transcription)	8	/	1185	0.0991383	0.991292	0.991292	15	/	281	0.0447809	ENSGALG00000014656;ENSGALG00000005395;ENSGALG00000030879	F1NXA7;A0A1D5P088;A0A1D5PV83;A0A1L1RRA1;Q5ZJ28;A0A1D5P736;A0A1L1RZ31;H9L0N7	R-GGA-6814885;R-GGA-6814549;R-GGA-6814559;R-GGA-73758;R-GGA-376419;R-GGA-73769;R-GGA-74986;R-GGA-5250947;R-GGA-73757;R-GGA-6814555;R-GGA-74993;R-GGA-8877902;R-GGA-5250930;R-GGA-6810235;R-GGA-5250938
R-GGA-5688426	Deubiquitination	1	/	384	0.0321258	0.994438	0.994438	1	/	61	0.00972112	ENSGALG00000030879	A0A1D5P088	R-GGA-5696605
R-GGA-5673001	RAF/MAP kinase cascade	1	/	361	0.0302016	0.992373	0.992373	1	/	36	0.00573705	ENSGALG00000027415	R4GFN5	R-GGA-5672965
R-GGA-73857	RNA Polymerase II Transcription	5	/	970	0.0811512	0.996957	0.996957	7	/	237	0.0377689	ENSGALG00000014656;ENSGALG00000030879	A0A1D5P088;A0A1D5PV83;Q5ZJ28;A0A1D5P736;H9L0N7	R-GGA-6814885;R-GGA-6814555;R-GGA-6814549;R-GGA-6814559;R-GGA-376419;R-GGA-8877902;R-GGA-6810235
R-GGA-73894	DNA Repair	1	/	432	0.0361416	0.997129	0.997129	6	/	203	0.0323506	ENSGALG00000043607	A0A1D5PAJ6	R-GGA-6785361;R-GGA-6785342;R-GGA-6786166;R-GGA-6788392;R-GGA-6788385;R-GGA-6786171
R-GGA-2262752	Cellular responses to stress	1	/	457	0.0382331	0.997967	0.997967	3	/	104	0.0165737	ENSGALG00000030879	A0A1D5P088	R-GGA-5618099;R-GGA-5618080;R-GGA-5618093
R-GGA-112316	Neuronal System	1	/	511	0.0427508	0.999038	0.999038	4	/	113	0.018008	ENSGALG00000027415	R4GFN5	R-GGA-442760;R-GGA-442732;R-GGA-432164;R-GGA-445367
R-GGA-9006934	Signaling by Receptor Tyrosine Kinases	1	/	555	0.0464319	0.999479	0.999479	6	/	462	0.0736255	ENSGALG00000044505	A0A1L1RS36	R-GGA-5357479;R-GGA-5218819;R-GGA-4420143;R-GGA-5357429;R-GGA-4420140;R-GGA-4420206
R-GGA-8953897	Cellular responses to external stimuli	1	/	566	0.0473521	0.999553	0.999553	3	/	139	0.0221514	ENSGALG00000030879	A0A1D5P088	R-GGA-5618099;R-GGA-5618080;R-GGA-5618093
R-GGA-199991	Membrane Trafficking	3	/	921	0.0770518	0.999704	0.999704	2	/	154	0.0245418	ENSGALG00000026796	A0A1D5P9J2;R4GG77;A0A1D5PBP9	R-GGA-421831;R-GGA-421835
R-GGA-5653656	Vesicle-mediated transport	3	/	953	0.0797289	0.9998	0.9998	2	/	170	0.0270916	ENSGALG00000026796	A0A1D5P9J2;R4GG77;A0A1D5PBP9	R-GGA-421831;R-GGA-421835
R-GGA-109582	Hemostasis	1	/	702	0.05873	0.999934	0.999934	1	/	221	0.0352191	ENSGALG00000005575	E1C1N8	R-GGA-992708
R-GGA-212436	Generic Transcription Pathway	1	/	763	0.0638333	0.999972	0.999972	2	/	188	0.0299602	ENSGALG00000030879	A0A1D5P088	R-GGA-376419;R-GGA-8877902
R-GGA-8953854	Metabolism of RNA	2	/	953	0.0797289	0.999973	0.999973	7	/	72	0.0114741	ENSGALG00000040696;ENSGALG00000000988	Q5F3X4;A0A1D5PXQ6	R-GGA-72139;R-GGA-75083;R-GGA-72143;R-GGA-156661;R-GGA-75081;R-GGA-75082;R-GGA-75079
R-GGA-1640170	Cell Cycle	1	/	888	0.074291	0.999995	0.999995	3	/	237	0.0377689	ENSGALG00000043607	A0A1D5PAJ6	R-GGA-606287;R-GGA-606349;R-GGA-606326
R-GGA-162582	Signal Transduction	15	/	2785	0.232996	0.999998	0.999998	26	/	1298	0.206853	ENSGALG00000025898;ENSGALG00000027415;ENSGALG00000044505;ENSGALG00000000966;ENSGALG00000000857;ENSGALG00000030407;ENSGALG00000008073;ENSGALG00000001569	A0A1D5PJL5;R4GFN5;A0A1D5P9T0;F1P3W6;A0A1L1RS36;Q9PSX7;Q5ZJB0;R4GHC9;A0A1D5PB14;A0A1L1RKT0;A0A1D5PXB4;F1NDA0;A0A1L1RUA4;A0A1D5PM65;Q6RW63	R-GGA-419166;R-GGA-419049;R-GGA-5669158;R-GGA-5623667;R-GGA-2029456;R-GGA-195146;R-GGA-194854;R-GGA-5623632;R-GGA-201821;R-GGA-5623622;R-GGA-109858;R-GGA-194922;R-GGA-2059926;R-GGA-2534087;R-GGA-5357479;R-GGA-5218819;R-GGA-201475;R-GGA-194913;R-GGA-4420206;R-GGA-5671970;R-GGA-5672965;R-GGA-4420143;R-GGA-5357429;R-GGA-4420140;R-GGA-202626;R-GGA-5665748
R-GGA-1430728	Metabolism	9	/	2548	0.213168	1	1	26	/	1502	0.239363	ENSGALG00000000630;ENSGALG00000033511;ENSGALG00000040896;ENSGALG00000036484;ENSGALG00000006290;ENSGALG00000007508	A0A1D5P4J8;A0A1D5P842;F1NW51;A0A1D5P6Q5;A0A1D5PS28;A0A1D5NVP2;F1NM73;A0A1L1RKS2;F1NU27	R-GGA-1971491;R-GGA-75872;R-GGA-2018682;R-GGA-2022065;R-GGA-1971487;R-GGA-193709;R-GGA-2022052;R-GGA-1878002;R-GGA-1889955;R-GGA-2022063;R-GGA-199202;R-GGA-2022911;R-GGA-2076611;R-GGA-163756;R-GGA-2022061;R-GGA-163733;R-GGA-2018659;R-GGA-1971483;R-GGA-1889981;R-GGA-1971482;R-GGA-1889978;R-GGA-2022056;R-GGA-2160851;R-GGA-1678694;R-GGA-192157;R-GGA-193845
R-GGA-597592	Post-translational protein modification	2	/	1768	0.147913	1	1	6	/	301	0.0479681	ENSGALG00000037784;ENSGALG00000030879	A0A1D5P088;A0A1D5PFK3	R-GGA-8879117;R-GGA-8931648;R-GGA-5617037;R-GGA-5696605;R-GGA-5615637;R-GGA-8931653
R-GGA-392499	Metabolism of proteins	2	/	2389	0.199866	1	1	6	/	411	0.065498	ENSGALG00000037784;ENSGALG00000030879	A0A1D5P088;A0A1D5PFK3	R-GGA-8879117;R-GGA-8931648;R-GGA-5617037;R-GGA-5696605;R-GGA-5615637;R-GGA-8931653

## Sheet: BR_ratiosig
PATHWAY		ENTITIES						REACTIONS				Submitted entities found	Mapped entities	Found reaction identifiers
Identifier	Name	Found		Total	Ratio	pValue	FDR	Found		Total	Ratio
R-GGA-3000157	Laminin interactions	6	/	20	0.00351376	0.000328328	0.0485182	5	/	6	0.000956175	ENSGALG00000006802	E1C700;A0A1D5PVM8;A0A1D5PMA9;A0A1D5P4L2;A0A1D5PGG9;A0A1D5NYS7	R-GGA-4084505;R-GGA-2426450;R-GGA-216048;R-GGA-3907292;R-GGA-216058
R-GGA-432722	Golgi Associated Vesicle Biogenesis	2	/	71	0.00593993	0.449568	0.522634	2	/	3	0.000478088	ENSGALG00000011621	A0A1D5P7X1;F1NVD2	R-GGA-421831;R-GGA-421835
R-GGA-3371497	HSP90 chaperone cycle for steroid hormone receptors (SHR)	3	/	107	0.00895173	0.402091	0.522634	1	/	12	0.00191235	ENSGALG00000000433	F1NXR6;A0A1L1RJP8;A0A1L1RJ25	R-GGA-5618080
R-GGA-2024096	HS-GAG degradation	2	/	49	0.00409939	0.28246	0.522634	1	/	14	0.00223108	ENSGALG00000011328	F1NW93;A0A1D5PIW3	R-GGA-2090079
R-GGA-5173105	O-linked glycosylation	3	/	129	0.0107923	0.522634	0.522634	2	/	24	0.0038247	ENSGALG00000039219	F1NQ88;A0A1D5P4Q9;A0A1D5P958	R-GGA-5173005;R-GGA-5173192
R-GGA-983231	Factors involved in megakaryocyte development and platelet production	8	/	207	0.0173178	0.079421	0.522634	4	/	28	0.00446215	ENSGALG00000000433;ENSGALG00000002335;ENSGALG00000001828	A0A1D5PMB7;F1NXR6;A0A1L1RJP8;F1NFS1;F1P160;A0A1L1RJ25;A0A1D5PI26;A0A1D5NWK0	R-GGA-983266;R-GGA-1011598;R-GGA-997237;R-GGA-983259
R-GGA-1650814	Collagen biosynthesis and modifying enzymes	3	/	117	0.00978834	0.458315	0.522634	1	/	43	0.00685259	ENSGALG00000039219	F1NQ88;A0A1D5P4Q9;A0A1D5P958	R-GGA-2002428
R-GGA-211945	Phase I - Functionalization of compounds	5	/	143	0.0119635	0.194402	0.522634	5	/	83	0.0132271	ENSGALG00000001314;ENSGALG00000040247	Q7T048;A0A1D5PM03;A0A1D5PII5;A0A1L1RZ33;F1P3I2	R-GGA-140355;R-GGA-8937169;R-GGA-8936849;R-GGA-140359;R-GGA-8937191
R-GGA-211859	Biological oxidations	6	/	254	0.0212499	0.461578	0.522634	6	/	141	0.0224701	ENSGALG00000001314;ENSGALG00000040247;ENSGALG00000005626	Q7T048;A0A1D5PM03;A0A1D5PII5;A0A1L1RZ33;F1P3I2;F1NGS3	R-GGA-8954262;R-GGA-140355;R-GGA-8937169;R-GGA-8936849;R-GGA-140359;R-GGA-8937191
R-GGA-1474244	Extracellular matrix organization	11	/	409	0.0342174	0.263405	0.522634	15	/	212	0.0337849	ENSGALG00000039219;ENSGALG00000037625;ENSGALG00000006802	E1C700;A0A1D5PVM8;F1NQ88;A0A1D5NXE0;A0A1D5NW86;A0A1D5PMA9;A0A1D5P4L2;A0A1D5PGG9;A0A1D5P4Q9;A0A1D5P958;A0A1D5NYS7	R-GGA-4084505;R-GGA-2426450;R-GGA-3907292;R-GGA-2161282;R-GGA-2129353;R-GGA-2396399;R-GGA-216058;R-GGA-216048;R-GGA-2129385;R-GGA-1592387;R-GGA-2002428;R-GGA-2129375;R-GGA-2129362;R-GGA-2129357;R-GGA-2485148
R-GGA-9006934	Signaling by Receptor Tyrosine Kinases	12	/	555	0.0464319	0.527807	0.527807	14	/	462	0.0736255	ENSGALG00000031440;ENSGALG00000006045;ENSGALG00000001828;ENSGALG00000006802	E1C700;A0A1D5P4W3;A0A1D5PVM8;A0A1D5PMA9;A0A1D5NXU4;F1NFS1;A0A1D5P4L2;A0A1D5PGG9;A0A1D5NYS7;A0A1D5PI26;A0A1D5NWK0;F1NB17	R-GGA-8867047;R-GGA-205319;R-GGA-182986;R-GGA-183002;R-GGA-182994;R-GGA-8867041;R-GGA-1433423;R-GGA-205244;R-GGA-182990;R-GGA-8875482;R-GGA-1433506;R-GGA-8951490;R-GGA-8874079;R-GGA-8875490
R-GGA-1474290	Collagen formation	3	/	141	0.0117962	0.582585	0.582585	1	/	66	0.0105179	ENSGALG00000039219	F1NQ88;A0A1D5P4Q9;A0A1D5P958	R-GGA-2002428
R-GGA-421837	Clathrin derived vesicle budding	2	/	95	0.0079478	0.604386	0.604386	2	/	9	0.00143426	ENSGALG00000011621	A0A1D5P7X1;F1NVD2	R-GGA-421831;R-GGA-421835
R-GGA-199992	trans-Golgi Network Vesicle Budding	2	/	95	0.0079478	0.604386	0.604386	2	/	9	0.00143426	ENSGALG00000011621	A0A1D5P7X1;F1NVD2	R-GGA-421831;R-GGA-421835
R-GGA-1638091	Heparan sulfate/heparin (HS-GAG) metabolism	2	/	98	0.00819878	0.621263	0.621263	1	/	29	0.00462151	ENSGALG00000011328	F1NW93;A0A1D5PIW3	R-GGA-2090079
R-GGA-449147	Signaling by Interleukins	7	/	350	0.0292814	0.62435	0.62435	21	/	270	0.0430279	ENSGALG00000004370;ENSGALG00000007253;ENSGALG00000029940;ENSGALG00000002583	E1C117;A0A1L1S0H7;A0A1D5P4U4;A0A1D5PHN6;F1NHX1;F1NVF2;O73909	R-GGA-727819;R-GGA-450333;R-GGA-914182;R-GGA-446868;R-GGA-445753;R-GGA-445752;R-GGA-450133;R-GGA-450346;R-GGA-446694;R-GGA-450296;R-GGA-449058;R-GGA-446862;R-GGA-446701;R-GGA-446684;R-GGA-448703;R-GGA-507719;R-GGA-446130;R-GGA-912627;R-GGA-879917;R-GGA-446648;R-GGA-446634
R-GGA-192105	Synthesis of bile acids and bile salts	1	/	55	0.00460136	0.692926	0.692926	1	/	53	0.00844622	ENSGALG00000032149	A0A1D5P2S4	R-GGA-8867667
R-GGA-5620912	Anchoring of the basal body to the plasma membrane	3	/	170	0.0142224	0.706476	0.706476	6	/	7	0.00111554	ENSGALG00000000433	F1NXR6;A0A1L1RJP8;A0A1L1RJ25	R-GGA-5626681;R-GGA-5617816;R-GGA-5638009;R-GGA-5626220;R-GGA-5626228;R-GGA-5626227
R-GGA-194068	Bile acid and bile salt metabolism	1	/	64	0.0053543	0.747005	0.747005	1	/	63	0.0100398	ENSGALG00000032149	A0A1D5P2S4	R-GGA-8867667
R-GGA-2262752	Cellular responses to stress	8	/	457	0.0382331	0.765246	0.765246	13	/	104	0.0165737	ENSGALG00000004370;ENSGALG00000000433;ENSGALG00000006794	A0A1L1S0H7;A0A1D5PHN6;F1NXR6;F1NVF2;A0A1L1RJP8;F1NEG1;A0A1D5P8T3;A0A1L1RJ25	R-GGA-3228469;R-GGA-450333;R-GGA-5682018;R-GGA-450296;R-GGA-5618080;R-GGA-3238999;R-GGA-5693540;R-GGA-5693612;R-GGA-5682044;R-GGA-3785768;R-GGA-6792712;R-GGA-5682020;R-GGA-5682026
R-GGA-1280215	Cytokine Signaling in Immune system	7	/	425	0.0355559	0.807309	0.807309	21	/	342	0.054502	ENSGALG00000004370;ENSGALG00000007253;ENSGALG00000029940;ENSGALG00000002583	E1C117;A0A1L1S0H7;A0A1D5P4U4;A0A1D5PHN6;F1NHX1;F1NVF2;O73909	R-GGA-727819;R-GGA-450333;R-GGA-914182;R-GGA-446868;R-GGA-445753;R-GGA-445752;R-GGA-450133;R-GGA-450346;R-GGA-446694;R-GGA-450296;R-GGA-449058;R-GGA-446862;R-GGA-446701;R-GGA-446684;R-GGA-448703;R-GGA-507719;R-GGA-446130;R-GGA-912627;R-GGA-879917;R-GGA-446648;R-GGA-446634
R-GGA-5689880	Ub-specific processing proteases	4	/	270	0.0225885	0.831466	0.831466	2	/	31	0.00494024	ENSGALG00000006824	A0A1D5NWW3;F1NES4;A0A1D5PHP0;A0A1D5PJM2	R-GGA-6781797;R-GGA-6781814
R-GGA-8957322	Metabolism of steroids	2	/	161	0.0134694	0.860345	0.860345	7	/	136	0.0216733	ENSGALG00000041687;ENSGALG00000032149	A0A1D5P2S4;A0A1D5PX69	R-GGA-1655842;R-GGA-1655851;R-GGA-2065550;R-GGA-2065549;R-GGA-1655831;R-GGA-2065539;R-GGA-8867667
R-GGA-1474228	Degradation of the extracellular matrix	2	/	162	0.0135531	0.862676	0.862676	1	/	68	0.0108367	ENSGALG00000037625	A0A1D5NXE0;A0A1D5NW86	R-GGA-2485148
R-GGA-5663220	RHO GTPases Activate Formins	3	/	226	0.0189074	0.863735	0.863735	1	/	12	0.00191235	ENSGALG00000000433	F1NXR6;A0A1L1RJP8;A0A1L1RJ25	R-GGA-375302
R-GGA-1630316	Glycosaminoglycan metabolism	2	/	184	0.0153936	0.905721	0.905721	2	/	74	0.0117928	ENSGALG00000011328	F1NW93;A0A1D5PIW3	R-GGA-1630306;R-GGA-2090079
R-GGA-5688426	Deubiquitination	5	/	384	0.0321258	0.915988	0.915988	3	/	61	0.00972112	ENSGALG00000004460;ENSGALG00000006824	A0A1D5NWW3;F1NSF2;F1NES4;A0A1D5PHP0;A0A1D5PJM2	R-GGA-6781797;R-GGA-5689630;R-GGA-6781814
R-GGA-8953897	Cellular responses to external stimuli	8	/	566	0.0473521	0.920766	0.920766	13	/	139	0.0221514	ENSGALG00000004370;ENSGALG00000000433;ENSGALG00000006794	A0A1L1S0H7;A0A1D5PHN6;F1NXR6;F1NVF2;A0A1L1RJP8;F1NEG1;A0A1D5P8T3;A0A1L1RJ25	R-GGA-3228469;R-GGA-450333;R-GGA-5682018;R-GGA-450296;R-GGA-5618080;R-GGA-3238999;R-GGA-5693540;R-GGA-5693612;R-GGA-5682044;R-GGA-3785768;R-GGA-6792712;R-GGA-5682020;R-GGA-5682026
R-GGA-72163	mRNA Splicing - Major Pathway	3	/	264	0.0220865	0.922961	0.922961	3	/	3	0.000478088	ENSGALG00000012364;ENSGALG00000021679	E1C3R0;Q66VY4;A0A1D5PTP8	R-GGA-72139;R-GGA-72143;R-GGA-156661
R-GGA-72172	mRNA Splicing	3	/	277	0.0231741	0.937082	0.937082	3	/	7	0.00111554	ENSGALG00000012364;ENSGALG00000021679	E1C3R0;Q66VY4;A0A1D5PTP8	R-GGA-72139;R-GGA-72143;R-GGA-156661
R-GGA-2029480	Fcgamma receptor (FCGR) dependent phagocytosis	1	/	131	0.0109596	0.940462	0.940462	1	/	30	0.00478088	ENSGALG00000012281	F1NBV7	R-GGA-2029475
R-GGA-9006936	Signaling by TGF-beta family members	1	/	151	0.0126328	0.961404	0.961404	1	/	78	0.0124303	ENSGALG00000003120	E1C3T2	R-GGA-173481
R-GGA-5617833	Cilium Assembly	3	/	316	0.0264369	0.966377	0.966377	12	/	40	0.0063745	ENSGALG00000000433	F1NXR6;A0A1L1RJP8;A0A1L1RJ25	R-GGA-5624952;R-GGA-5626681;R-GGA-5617816;R-GGA-5638009;R-GGA-5625421;R-GGA-5624949;R-GGA-5625416;R-GGA-5626220;R-GGA-5625426;R-GGA-5626228;R-GGA-5625424;R-GGA-5626227
R-GGA-5576891	Cardiac conduction	1	/	159	0.0133021	0.967554	0.967554	1	/	16	0.0025498	ENSGALG00000036964	A0A1D5P193	R-GGA-5577213
R-GGA-8978868	Fatty acid metabolism	2	/	259	0.0216682	0.975533	0.975533	3	/	154	0.0245418	ENSGALG00000001314	A0A1D5PM03;F1P3I2	R-GGA-2314678;R-GGA-140355;R-GGA-140359
R-GGA-1852241	Organelle biogenesis and maintenance	3	/	368	0.0307873	0.985964	0.985964	12	/	45	0.00717131	ENSGALG00000000433	F1NXR6;A0A1L1RJP8;A0A1L1RJ25	R-GGA-5624952;R-GGA-5626681;R-GGA-5617816;R-GGA-5638009;R-GGA-5625421;R-GGA-5624949;R-GGA-5625416;R-GGA-5626220;R-GGA-5625426;R-GGA-5626228;R-GGA-5625424;R-GGA-5626227
R-GGA-195258	RHO GTPase Effectors	3	/	381	0.0318748	0.988784	0.988784	2	/	55	0.00876494	ENSGALG00000000433	F1NXR6;A0A1L1RJP8;A0A1L1RJ25	R-GGA-5672329;R-GGA-375302
R-GGA-72203	Processing of Capped Intron-Containing Pre-mRNA	3	/	403	0.0337154	0.992362	0.992362	3	/	11	0.00175299	ENSGALG00000012364;ENSGALG00000021679	E1C3R0;Q66VY4;A0A1D5PTP8	R-GGA-72139;R-GGA-72143;R-GGA-156661
R-GGA-418594	G alpha (i) signalling events	2	/	327	0.0273571	0.993241	0.993241	3	/	94	0.0149801	ENSGALG00000003839;ENSGALG00000028519	E1C8F2;R4GH78	R-GGA-749456;R-GGA-749454;R-GGA-380073
R-GGA-71387	Metabolism of carbohydrates	2	/	363	0.0303689	0.99664	0.99664	2	/	170	0.0270916	ENSGALG00000011328	F1NW93;A0A1D5PIW3	R-GGA-1630306;R-GGA-2090079
R-GGA-194840	Rho GTPase cycle	1	/	267	0.0223375	0.996921	0.996921	1	/	4	0.00063745	ENSGALG00000046068	A0A1L1RVX8	R-GGA-194922
R-GGA-397014	Muscle contraction	1	/	272	0.0227558	0.997241	0.997241	1	/	26	0.00414343	ENSGALG00000036964	A0A1D5P193	R-GGA-5577213
R-GGA-73894	DNA Repair	2	/	432	0.0361416	0.999144	0.999144	68	/	203	0.0323506	ENSGALG00000006794	F1NEG1;A0A1D5P8T3	R-GGA-5686704;R-GGA-5687484;R-GGA-5684875;R-GGA-5693580;R-GGA-5685838;R-GGA-5686685;R-GGA-5687465;R-GGA-5687464;R-GGA-5693583;R-GGA-5686642;R-GGA-5683986;R-GGA-5693620;R-GGA-5683384;R-GGA-5683077;R-GGA-5682992;R-GGA-5683964;R-GGA-5693602;R-GGA-5682983;R-GGA-5693598;R-GGA-5682967;R-GGA-5693612;R-GGA-5683967;R-GGA-5693608;R-GGA-5687664;R-GGA-5685994;R-GGA-5693589;R-GGA-5682044;R-GGA-5685985;R-GGA-3…
R-GGA-1266738	Developmental Biology	3	/	549	0.0459299	0.999473	0.999473	4	/	159	0.0253386	ENSGALG00000002201;ENSGALG00000002583	A0A1D5PTH5;F1NHX1;F1NV96	R-GGA-6814187;R-GGA-6810843;R-GGA-6814374;R-GGA-8854905
R-GGA-422475	Axon guidance	1	/	398	0.0332971	0.999828	0.999828	1	/	128	0.0203984	ENSGALG00000002583	F1NHX1	R-GGA-8854905
R-GGA-112316	Neuronal System	1	/	511	0.0427508	0.999986	0.999986	1	/	113	0.018008	ENSGALG00000007253	E1C117	R-GGA-6800380

## Sheet: SW_ratiosig
PATHWAY		ENTITIES						REACTIONS				Submitted entities found	Mapped entities	Found reaction identifiers
Identifier	Name	Found		Total	Ratio	pValue	FDR	Found		Total	Ratio
R-GGA-5576891	Cardiac conduction	7	/	20	0.0133021	0.00570096	0.0816101	1	/	16	0.0025498	ENSGALG00000000329	A0A1L1RZ16;A0A1D5PYI1;A0A1D5P3D5;F1NUT5;A0A1D5P9U4;A0A1D5PGQ5;A0A1L1RS05	R-GGA-5226904
R-GGA-432722	Golgi Associated Vesicle Biogenesis	3	/	71	0.00593993	0.0698258	0.289961	2	/	3	0.000478088	ENSGALG00000026796	A0A1D5P9J2;R4GG77;A0A1D5PBP9	R-GGA-421831;R-GGA-421835
R-GGA-397014	Muscle contraction	7	/	272	0.0227558	0.0724903	0.289961	1	/	26	0.00414343	ENSGALG00000000329	A0A1L1RZ16;A0A1D5PYI1;A0A1D5P3D5;F1NUT5;A0A1D5P9U4;A0A1D5PGQ5;A0A1L1RS05	R-GGA-5226904
R-GGA-421837	Clathrin derived vesicle budding	3	/	95	0.0079478	0.133945	0.408539	2	/	9	0.00143426	ENSGALG00000026796	A0A1D5P9J2;R4GG77;A0A1D5PBP9	R-GGA-421831;R-GGA-421835
R-GGA-199992	trans-Golgi Network Vesicle Budding	3	/	95	0.0079478	0.133945	0.408539	2	/	9	0.00143426	ENSGALG00000026796	A0A1D5P9J2;R4GG77;A0A1D5PBP9	R-GGA-421831;R-GGA-421835
R-GGA-1638091	Heparan sulfate/heparin (HS-GAG) metabolism	3	/	98	0.00819878	0.143054	0.429163	6	/	29	0.00462151	ENSGALG00000036484;ENSGALG00000006290;ENSGALG00000007508	A0A1D5P4J8;F1NW51;F1NM73	R-GGA-1889978;R-GGA-1878002;R-GGA-1889955;R-GGA-2076611;R-GGA-1678694;R-GGA-1889981
R-GGA-3000157	Laminin interactions	1	/	42	0.00351376	0.428604	0.513219	1	/	6	0.000956175	ENSGALG00000038311	A0A1D5P5M7	R-GGA-4084507
R-GGA-2024096	HS-GAG degradation	1	/	49	0.00409939	0.479592	0.513219	1	/	14	0.00223108	ENSGALG00000007508	F1NM73	R-GGA-1678694
R-GGA-2029480	Fcgamma receptor (FCGR) dependent phagocytosis	3	/	131	0.0109596	0.253674	0.513219	1	/	30	0.00478088	ENSGALG00000008073	A0A1D5P9T0;Q6RW63;Q5ZJB0	R-GGA-2029456
R-GGA-5617833	Cilium Assembly	5	/	316	0.0264369	0.411369	0.513219	5	/	40	0.0063745	ENSGALG00000019215;ENSGALG00000000966	A0A1L1RMR6;F1P3W6;Q5ZI75;A0A1D5PWK2;F1NSK2	R-GGA-5626681;R-GGA-5617816;R-GGA-5624127;R-GGA-5638009;R-GGA-5624126
R-GGA-1630316	Glycosaminoglycan metabolism	4	/	184	0.0153936	0.230366	0.513219	19	/	74	0.0117928	ENSGALG00000000630;ENSGALG00000036484;ENSGALG00000006290;ENSGALG00000007508	A0A1D5P4J8;F1NW51;F1NM73;F1NU27	R-GGA-2022061;R-GGA-1971491;R-GGA-2018659;R-GGA-2018682;R-GGA-2022065;R-GGA-1971483;R-GGA-1889981;R-GGA-1971482;R-GGA-1971487;R-GGA-1889978;R-GGA-2022052;R-GGA-2022056;R-GGA-1878002;R-GGA-2160851;R-GGA-1889955;R-GGA-2022063;R-GGA-2022911;R-GGA-2076611;R-GGA-1678694
R-GGA-9006936	Signaling by TGF-beta family members	3	/	151	0.0126328	0.325667	0.513219	3	/	78	0.0124303	ENSGALG00000025898	A0A1D5PJL5;R4GHC9;A0A1D5PB14	R-GGA-201475;R-GGA-201821;R-GGA-202626
R-GGA-8978868	Fatty acid metabolism	4	/	259	0.0216682	0.452565	0.513219	2	/	154	0.0245418	ENSGALG00000040896	A0A1D5P842;A0A1D5P6Q5;A0A1D5PS28;A0A1L1RKS2	R-GGA-75872;R-GGA-163756
R-GGA-192105	Synthesis of bile acids and bile salts	1	/	55	0.00460136	0.519681	0.519681	3	/	53	0.00844622	ENSGALG00000033511	A0A1D5NVP2	R-GGA-192157;R-GGA-193845;R-GGA-193709
R-GGA-1852241	Organelle biogenesis and maintenance	5	/	368	0.0307873	0.543433	0.543433	5	/	45	0.00717131	ENSGALG00000019215;ENSGALG00000000966	A0A1L1RMR6;F1P3W6;Q5ZI75;A0A1D5PWK2;F1NSK2	R-GGA-5626681;R-GGA-5617816;R-GGA-5624127;R-GGA-5638009;R-GGA-5624126
R-GGA-194068	Bile acid and bile salt metabolism	1	/	64	0.0053543	0.57413	0.57413	3	/	63	0.0100398	ENSGALG00000033511	A0A1D5NVP2	R-GGA-192157;R-GGA-193845;R-GGA-193709
R-GGA-422475	Axon guidance	5	/	398	0.0332971	0.613143	0.613143	8	/	128	0.0203984	ENSGALG00000037784;ENSGALG00000023703;ENSGALG00000001569	Q9DG15;A0A1D5PI31;Q9PSX7;A0A1D5PFK3;A0A1D5P926	R-GGA-416588;R-GGA-419049;R-GGA-3928641;R-GGA-3928625;R-GGA-3928614;R-GGA-9010872;R-GGA-3928633;R-GGA-3928631
R-GGA-71387	Metabolism of carbohydrates	4	/	363	0.0303689	0.714324	0.714324	19	/	170	0.0270916	ENSGALG00000000630;ENSGALG00000036484;ENSGALG00000006290;ENSGALG00000007508	A0A1D5P4J8;F1NW51;F1NM73;F1NU27	R-GGA-2022061;R-GGA-1971491;R-GGA-2018659;R-GGA-2018682;R-GGA-2022065;R-GGA-1971483;R-GGA-1889981;R-GGA-1971482;R-GGA-1971487;R-GGA-1889978;R-GGA-2022052;R-GGA-2022056;R-GGA-1878002;R-GGA-2160851;R-GGA-1889955;R-GGA-2022063;R-GGA-2022911;R-GGA-2076611;R-GGA-1678694
R-GGA-1266738	Developmental Biology	6	/	549	0.0459299	0.742599	0.742599	9	/	159	0.0253386	ENSGALG00000033770;ENSGALG00000037784;ENSGALG00000023703;ENSGALG00000001569	A0A1D5PM25;Q9DG15;A0A1D5PI31;Q9PSX7;A0A1D5PFK3;A0A1D5P926	R-GGA-416588;R-GGA-419049;R-GGA-3928641;R-GGA-448963;R-GGA-3928625;R-GGA-3928614;R-GGA-9010872;R-GGA-3928633;R-GGA-3928631
R-GGA-195258	RHO GTPase Effectors	4	/	381	0.0318748	0.748972	0.748972	8	/	55	0.00876494	ENSGALG00000008073;ENSGALG00000001569	A0A1D5P9T0;Q9PSX7;Q6RW63;Q5ZJB0	R-GGA-419049;R-GGA-5669158;R-GGA-5623667;R-GGA-5623632;R-GGA-5671970;R-GGA-5623622;R-GGA-5665748;R-GGA-2029456
R-GGA-3371497	HSP90 chaperone cycle for steroid hormone receptors (SHR)	1	/	107	0.00895173	0.760627	0.760627	3	/	12	0.00191235	ENSGALG00000030879	A0A1D5P088	R-GGA-5618099;R-GGA-5618080;R-GGA-5618093
R-GGA-1650814	Collagen biosynthesis and modifying enzymes	1	/	117	0.00978834	0.790705	0.790705	14	/	43	0.00685259	ENSGALG00000038311	A0A1D5P5M7	R-GGA-2002460;R-GGA-1980233;R-GGA-1650808;R-GGA-8948234;R-GGA-8944230;R-GGA-2089971;R-GGA-8948226;R-GGA-1981120;R-GGA-2022073;R-GGA-1981104;R-GGA-8948232;R-GGA-8948231;R-GGA-8948230;R-GGA-8948228
R-GGA-418594	G alpha (i) signalling events	3	/	327	0.0273571	0.812772	0.812772	1	/	94	0.0149801	ENSGALG00000000857	A0A1L1RKT0;F1NDA0;A0A1L1RUA4	R-GGA-2534087
R-GGA-5173105	O-linked glycosylation	1	/	129	0.0107923	0.82188	0.82188	5	/	24	0.0038247	ENSGALG00000037784	A0A1D5PFK3	R-GGA-8879117;R-GGA-8931648;R-GGA-5617037;R-GGA-5615637;R-GGA-8931653
R-GGA-1474290	Collagen formation	1	/	141	0.0117962	0.848436	0.848436	15	/	66	0.0105179	ENSGALG00000038311	A0A1D5P5M7	R-GGA-2002460;R-GGA-1980233;R-GGA-1650808;R-GGA-8948234;R-GGA-8944230;R-GGA-2089971;R-GGA-8948226;R-GGA-1981120;R-GGA-2022073;R-GGA-2213200;R-GGA-1981104;R-GGA-8948232;R-GGA-8948231;R-GGA-8948230;R-GGA-8948228
R-GGA-211945	Phase I - Functionalization of compounds	1	/	143	0.0119635	0.852462	0.852462	3	/	83	0.0132271	ENSGALG00000033511	A0A1D5NVP2	R-GGA-192157;R-GGA-193845;R-GGA-193709
R-GGA-72163	mRNA Splicing - Major Pathway	2	/	264	0.0220865	0.86827	0.86827	3	/	3	0.000478088	ENSGALG00000040696;ENSGALG00000000988	Q5F3X4;A0A1D5PXQ6	R-GGA-72139;R-GGA-72143;R-GGA-156661
R-GGA-8957322	Metabolism of steroids	1	/	161	0.0134694	0.884235	0.884235	3	/	136	0.0216733	ENSGALG00000033511	A0A1D5NVP2	R-GGA-192157;R-GGA-193845;R-GGA-193709
R-GGA-72172	mRNA Splicing	2	/	277	0.0231741	0.88528	0.88528	7	/	7	0.00111554	ENSGALG00000040696;ENSGALG00000000988	Q5F3X4;A0A1D5PXQ6	R-GGA-72139;R-GGA-75083;R-GGA-72143;R-GGA-156661;R-GGA-75081;R-GGA-75082;R-GGA-75079
R-GGA-1474228	Degradation of the extracellular matrix	1	/	162	0.0135531	0.885785	0.885785	5	/	68	0.0108367	ENSGALG00000038311	A0A1D5P5M7	R-GGA-2471621;R-GGA-2168923;R-GGA-1604722;R-GGA-1604732;R-GGA-1592278
R-GGA-5620912	Anchoring of the basal body to the plasma membrane	1	/	170	0.0142224	0.897469	0.897469	3	/	7	0.00111554	ENSGALG00000000966	F1P3W6	R-GGA-5626681;R-GGA-5617816;R-GGA-5638009
R-GGA-1474244	Extracellular matrix organization	3	/	409	0.0342174	0.911675	0.911675	24	/	212	0.0337849	ENSGALG00000037784;ENSGALG00000038311;ENSGALG00000036484	A0A1D5P4J8;A0A1D5PFK3;A0A1D5P5M7	R-GGA-2471621;R-GGA-1604722;R-GGA-4084507;R-GGA-2002460;R-GGA-4088264;R-GGA-1980233;R-GGA-1650808;R-GGA-2168923;R-GGA-8948234;R-GGA-8944230;R-GGA-2089971;R-GGA-1604732;R-GGA-2396395;R-GGA-8948226;R-GGA-1981120;R-GGA-2424246;R-GGA-2022073;R-GGA-2213200;R-GGA-1981104;R-GGA-8948232;R-GGA-8948231;R-GGA-8948230;R-GGA-8948228;R-GGA-1592278
R-GGA-983231	Factors involved in megakaryocyte development and platelet production	1	/	207	0.0173178	0.937816	0.937816	1	/	28	0.00446215	ENSGALG00000005575	E1C1N8	R-GGA-992708
R-GGA-449147	Signaling by Interleukins	2	/	350	0.0292814	0.948597	0.948597	16	/	270	0.0430279	ENSGALG00000030407	A0A1D5PXB4;A0A1D5PM65	R-GGA-1112708;R-GGA-1112565;R-GGA-1112755;R-GGA-1112727;R-GGA-1112514;R-GGA-1112703;R-GGA-1067640;R-GGA-1112690;R-GGA-1067688;R-GGA-1067676;R-GGA-1112604;R-GGA-1112510;R-GGA-1112602;R-GGA-1067651;R-GGA-1067667;R-GGA-1067659
R-GGA-5663220	RHO GTPases Activate Formins	1	/	226	0.0189074	0.951928	0.951928	1	/	12	0.00191235	ENSGALG00000001569	Q9PSX7	R-GGA-5665748
R-GGA-211859	Biological oxidations	1	/	254	0.0212499	0.967128	0.967128	3	/	141	0.0224701	ENSGALG00000033511	A0A1D5NVP2	R-GGA-192157;R-GGA-193845;R-GGA-193709
R-GGA-72203	Processing of Capped Intron-Containing Pre-mRNA	2	/	403	0.0337154	0.971959	0.971959	7	/	11	0.00175299	ENSGALG00000040696;ENSGALG00000000988	Q5F3X4;A0A1D5PXQ6	R-GGA-72139;R-GGA-75083;R-GGA-72143;R-GGA-156661;R-GGA-75081;R-GGA-75082;R-GGA-75079
R-GGA-194840	Rho GTPase cycle	1	/	267	0.0223375	0.972455	0.972455	4	/	4	0.00063745	ENSGALG00000001569	Q9PSX7	R-GGA-195146;R-GGA-194854;R-GGA-194913;R-GGA-194922
R-GGA-5689880	Ub-specific processing proteases	1	/	270	0.0225885	0.973557	0.973557	1	/	31	0.00494024	ENSGALG00000030879	A0A1D5P088	R-GGA-5696605
R-GGA-1280215	Cytokine Signaling in Immune system	2	/	425	0.0355559	0.978299	0.978299	16	/	342	0.054502	ENSGALG00000030407	A0A1D5PXB4;A0A1D5PM65	R-GGA-1112708;R-GGA-1112565;R-GGA-1112755;R-GGA-1112727;R-GGA-1112514;R-GGA-1112703;R-GGA-1067640;R-GGA-1112690;R-GGA-1067688;R-GGA-1067676;R-GGA-1112604;R-GGA-1112510;R-GGA-1112602;R-GGA-1067651;R-GGA-1067667;R-GGA-1067659
R-GGA-5688426	Deubiquitination	1	/	384	0.0321258	0.994438	0.994438	1	/	61	0.00972112	ENSGALG00000030879	A0A1D5P088	R-GGA-5696605
R-GGA-73894	DNA Repair	1	/	432	0.0361416	0.997129	0.997129	6	/	203	0.0323506	ENSGALG00000043607	A0A1D5PAJ6	R-GGA-6785361;R-GGA-6785342;R-GGA-6786166;R-GGA-6788392;R-GGA-6788385;R-GGA-6786171
R-GGA-2262752	Cellular responses to stress	1	/	457	0.0382331	0.997967	0.997967	3	/	104	0.0165737	ENSGALG00000030879	A0A1D5P088	R-GGA-5618099;R-GGA-5618080;R-GGA-5618093
R-GGA-112316	Neuronal System	1	/	511	0.0427508	0.999038	0.999038	4	/	113	0.018008	ENSGALG00000027415	R4GFN5	R-GGA-442760;R-GGA-442732;R-GGA-432164;R-GGA-445367
R-GGA-9006934	Signaling by Receptor Tyrosine Kinases	1	/	555	0.0464319	0.999479	0.999479	6	/	462	0.0736255	ENSGALG00000044505	A0A1L1RS36	R-GGA-5357479;R-GGA-5218819;R-GGA-4420143;R-GGA-5357429;R-GGA-4420140;R-GGA-4420206
R-GGA-8953897	Cellular responses to external stimuli	1	/	566	0.0473521	0.999553	0.999553	3	/	139	0.0221514	ENSGALG00000030879	A0A1D5P088	R-GGA-5618099;R-GGA-5618080;R-GGA-5618093

## Sheet: BR_genes
Submitted identifier	Found identifier
ENSGALG00000003839	E1C8F2
ENSGALG00000006824	A0A1D5PJM2
ENSGALG00000006824	A0A1D5NWW3
ENSGALG00000006824	A0A1D5PHP0
ENSGALG00000006824	F1NES4
ENSGALG00000011621	A0A1D5P7X1
ENSGALG00000011621	F1NVD2
ENSGALG00000006068	A0A1D5PMS7
ENSGALG00000006068	A0A1D5NX27
ENSGALG00000006068	A0A1D5NWY7
ENSGALG00000006068	F1NAU7
ENSGALG00000006068	A0A1D5P5G9
ENSGALG00000006068	A0A1D5PQM8
ENSGALG00000006068	A0A1D5NVT7
ENSGALG00000036964	A0A1D5P193
ENSGALG00000029940	A0A1D5P4U4
ENSGALG00000029940	O73909
ENSGALG00000002583	F1NHX1
ENSGALG00000018977	E1C9K4
ENSGALG00000039917	A0A1D5PLG0
ENSGALG00000030925	A0A1D5PR69
ENSGALG00000002458	A0A1D5P566
ENSGALG00000002458	F1NWG6
ENSGALG00000000433	A0A1L1RJ25
ENSGALG00000000433	A0A1L1RJP8
ENSGALG00000000433	F1NXR6
ENSGALG00000002335	A0A1D5PMB7
ENSGALG00000002335	F1P160
ENSGALG00000002453	F1NWH0
ENSGALG00000002453	A0A1D5P2Y4
ENSGALG00000021679	Q66VY4
ENSGALG00000021679	A0A1D5PTP8
ENSGALG00000012281	F1NBV7
ENSGALG00000041419	A0A1D5P534
ENSGALG00000041419	A0A1D5PU08
ENSGALG00000012364	E1C3R0
ENSGALG00000014387	H9L0I5
ENSGALG00000007785	A0A1D5PTL9
ENSGALG00000007785	F1NP50
ENSGALG00000039942	Q5ZIZ6
ENSGALG00000026167	F1NUD8
ENSGALG00000034939	A0A1D5P6B2
ENSGALG00000046068	A0A1L1RVX8
ENSGALG00000001314	A0A1D5PM03
ENSGALG00000001314	F1P3I2
ENSGALG00000002201	A0A1D5PTH5
ENSGALG00000002201	F1NV96
ENSGALG00000006802	E1C700
ENSGALG00000006802	A0A1D5PVM8
ENSGALG00000006802	A0A1D5NYS7
ENSGALG00000006802	A0A1D5PMA9
ENSGALG00000006802	A0A1D5P4L2
ENSGALG00000006802	A0A1D5PGG9
ENSGALG00000028519	R4GH78
ENSGALG00000039219	F1NQ88
ENSGALG00000039219	A0A1D5P4Q9
ENSGALG00000039219	A0A1D5P958
ENSGALG00000041934	A0A1D5PIZ1
ENSGALG00000041934	A0A1L1RUL3
ENSGALG00000007253	E1C117
ENSGALG00000008385	E1BXR8
ENSGALG00000008385	A0A1D5P3Z0
ENSGALG00000004460	F1NSF2
ENSGALG00000006045	F1NB17
ENSGALG00000040247	A0A1D5PII5
ENSGALG00000040247	A0A1L1RZ33
ENSGALG00000040247	Q7T048
ENSGALG00000032149	A0A1D5P2S4
ENSGALG00000030847	A0A1D5PEC1
ENSGALG00000011328	F1NW93
ENSGALG00000011328	A0A1D5PIW3
ENSGALG00000031718	P21869
ENSGALG00000000699	E1C3L4
ENSGALG00000000699	A0A1D5P8K6
ENSGALG00000000699	A0A1D5PAN8
ENSGALG00000022586	H9L385
ENSGALG00000004333	E1BY40
ENSGALG00000004333	A0A1D5PI29
ENSGALG00000001828	F1NFS1
ENSGALG00000001828	A0A1D5PI26
ENSGALG00000001828	A0A1D5NWK0
ENSGALG00000034196	A0A1D5NX70
ENSGALG00000023437	E1BYW3
ENSGALG00000005626	F1NGS3
ENSGALG00000001668	A0A1L1S0T9
ENSGALG00000001668	R4GIV8
ENSGALG00000004370	A0A1L1S0H7
ENSGALG00000004370	A0A1D5PHN6
ENSGALG00000004370	F1NVF2
ENSGALG00000011652	A0A1L1RWL8
ENSGALG00000011652	F1NT44
ENSGALG00000011652	A0A1D5PGM3
ENSGALG00000031440	A0A1D5P4W3
ENSGALG00000031440	A0A1D5NXU4
ENSGALG00000037625	A0A1D5NXE0
ENSGALG00000037625	A0A1D5NW86
ENSGALG00000006794	F1NEG1
ENSGALG00000006794	A0A1D5P8T3
ENSGALG00000041687	A0A1D5PX69
ENSGALG00000001383	F1NJL4
ENSGALG00000003120	E1C3T2
ENSGALG00000011816	F1NLP8

## Sheet: SW_genes
Submitted identifier	Found identifier
ENSGALG00000026796	A0A1D5P9J2
ENSGALG00000026796	R4GG77
ENSGALG00000026796	A0A1D5PBP9
ENSGALG00000044505	A0A1L1RS36
ENSGALG00000000966	F1P3W6
ENSGALG00000000988	Q5F3X4
ENSGALG00000000329	A0A1D5PYI1
ENSGALG00000000329	A0A1L1RZ16
ENSGALG00000000329	A0A1D5P3D5
ENSGALG00000000329	A0A1L1RS05
ENSGALG00000000329	F1NUT5
ENSGALG00000000329	A0A1D5P9U4
ENSGALG00000000329	A0A1D5PGQ5
ENSGALG00000000703	E1C3K1
ENSGALG00000000703	A0A1D5PQD1
ENSGALG00000036484	A0A1D5P4J8
ENSGALG00000023703	A0A1D5PI31
ENSGALG00000023703	A0A1D5P926
ENSGALG00000023703	Q9DG15
ENSGALG00000014656	A0A1D5PV83
ENSGALG00000014656	Q5ZJ28
ENSGALG00000014656	A0A1D5P736
ENSGALG00000014656	H9L0N7
ENSGALG00000005395	F1NXA7
ENSGALG00000005395	A0A1L1RRA1
ENSGALG00000005395	A0A1L1RZ31
ENSGALG00000033770	A0A1D5PM25
ENSGALG00000033511	A0A1D5NVP2
ENSGALG00000005575	E1C1N8
ENSGALG00000030407	A0A1D5PXB4
ENSGALG00000030407	A0A1D5PM65
ENSGALG00000025898	A0A1D5PB14
ENSGALG00000025898	R4GHC9
ENSGALG00000025898	A0A1D5PJL5
ENSGALG00000030826	A0A1D5PS57
ENSGALG00000030826	A0A1D5PP90
ENSGALG00000027415	R4GFN5
ENSGALG00000000630	F1NU27
ENSGALG00000019215	F1NSK2
ENSGALG00000019215	A0A1L1RMR6
ENSGALG00000019215	Q5ZI75
ENSGALG00000019215	A0A1D5PWK2
ENSGALG00000032191	A0A1D5PVS4
ENSGALG00000011570	H9KZT7
ENSGALG00000011570	A0A1D5NT76
ENSGALG00000011570	A0A1L1RLR9
ENSGALG00000011570	A0A1L1RKI0
ENSGALG00000011570	A0A1L1RPP1
ENSGALG00000011570	A0A1L1RJV3
ENSGALG00000011570	A0A1L1RJ02
ENSGALG00000011570	A0A1D5NWF8
ENSGALG00000011570	A0A1L1RPI7
ENSGALG00000011570	A0A1L1RZL5
ENSGALG00000011570	A0A1D5PIC2
ENSGALG00000011570	A0A1D5NVR8
ENSGALG00000011570	A0A1L1RNK6
ENSGALG00000038311	A0A1D5P5M7
ENSGALG00000000857	A0A1L1RUA4
ENSGALG00000000857	A0A1L1RKT0
ENSGALG00000000857	F1NDA0
ENSGALG00000007508	F1NM73
ENSGALG00000043607	A0A1D5PAJ6
ENSGALG00000001569	Q9PSX7
ENSGALG00000037784	A0A1D5PFK3
ENSGALG00000040896	A0A1D5P842
ENSGALG00000040896	A0A1D5P6Q5
ENSGALG00000040896	A0A1D5PS28
ENSGALG00000040896	A0A1L1RKS2
ENSGALG00000040696	A0A1D5PXQ6
ENSGALG00000042199	A0A1D5PP15
ENSGALG00000042199	A0A1D5PPW3
ENSGALG00000042199	A0A1D5NV36
ENSGALG00000006290	F1NW51
ENSGALG00000008073	Q6RW63
ENSGALG00000008073	A0A1D5P9T0
ENSGALG00000008073	Q5ZJB0
ENSGALG00000030879	A0A1D5P088
