# Supplementary material for: Putative Epigenetic Biomarkers of Stress in Red Blood Cells of Chickens Reared Across Different Biomes
Source: Front Genet. 2020 Nov 2;11:508809. doi: 10.3389/fgene.2020.508809 (PMC7667380; doi:10.3389/fgene.2020.508809)
Supplement: Supplementary file 8 [file Data_Sheet_4.xlsx]

## Sheet: P<0.005
Early / Stressed vs Control	Test	Location	chr	start	end	width	logFC	p.value	adj.p	CpGs	GpCs	%of CpG	%of GpC			DMRs	BR			SW
BR	ADJW	chr1:61077901-61078000	chr1	61077901	61078000	100	3.18001	2.24433e-05	0.105035	4	11	0.04	0.11				Overlap	Total	%	Overlap	Total	%
		chr1:61078001-61078100	chr1	61078001	61078100	100	3.4487	0.000295176	0.828855	9	13	0.09	0.13			ADJW	13	38	34.2105	7	57	12.2807
		chr1:61078101-61078200	chr1	61078101	61078200	100	3.4487	0.000295176	0.828855	6	12	0.06	0.12			ROI	8	17	47.0588	4	6	66.6667
		chr1:194651201-194651300	chr1	194651201	194651300	100	1.33084	0.00418138	1	3	8	0.03	0.08
		chr1:195494701-195494800	chr1	195494701	195494800	100	-1.6502	0.00433576	1	1	13	0.01	0.13
		chr2:189101-189200	chr2	189101	189200	100	1.52602	0.00166332	1	7	13	0.07	0.13
		chr3:97197301-97197400	chr3	97197301	97197400	100	2.46009	0.00473424	1	3	8	0.03	0.08
		chr4:740001-740100	chr4	740001	740100	100	1.32997	0.00326885	1	1	5	0.01	0.05
		chr4:4253301-4253400	chr4	4253301	4253400	100	1.25643	0.00244166	1	5	9	0.05	0.09
		chr4:10787101-10787200	chr4	10787101	10787200	100	-1.36592	0.00465771	1	0	14	0	0.14
		chr4:85246901-85247000	chr4	85246901	85247000	100	1.63454	0.00209777	1	1	11	0.01	0.11
		chr4:85247001-85247100	chr4	85247001	85247100	100	1.63454	0.00209805	1	0	6	0	0.06
		chr5:5684301-5684400	chr5	5684301	5684400	100	0.901783	0.00180506	1	3	11	0.03	0.11
		chr6:11562201-11562300	chr6	11562201	11562300	100	1.72283	0.000510026	1	9	18	0.09	0.18
		chr6:17299601-17299700	chr6	17299601	17299700	100	2.08764	0.000477387	1	1	9	0.01	0.09
		chr7:23375601-23375700	chr7	23375601	23375700	100	-1.41298	0.0039433	1	4	13	0.04	0.13
		chr7:36453001-36453100	chr7	36453001	36453100	100	1.47904	0.0028589	1	2	10	0.02	0.1
		chr8:3901601-3901700	chr8	3901601	3901700	100	-1.87514	0.00155738	1	6	15	0.06	0.15
		chr11:458201-458300	chr11	458201	458300	100	1.6256	0.00259301	1	3	9	0.03	0.09
		chr12:16763201-16763300	chr12	16763201	16763300	100	1.47821	0.00368775	1	6	13	0.06	0.13
		chr13:17011401-17011500	chr13	17011401	17011500	100	-1.33661	0.00304871	1	14	18	0.14	0.18
		chr13:18395501-18395600	chr13	18395501	18395600	100	1.30694	0.00405956	1	1	9	0.01	0.09
		chr14:4134701-4134800	chr14	4134701	4134800	100	1.35599	0.000791088	1	10	16	0.1	0.16
		chr14:13126801-13126900	chr14	13126801	13126900	100	1.8374	0.0026097	1	4	11	0.04	0.11
		chr15:4610801-4610900	chr15	4610801	4610900	100	1.57099	0.00489396	1	1	4	0.01	0.04
		chr15:8004101-8004200	chr15	8004101	8004200	100	1.57045	0.000682157	1	0	9	0	0.09
		chr17:1822501-1822600	chr17	1822501	1822600	100	1.61087	0.00197258	1	1	7	0.01	0.07
		chr17:8204201-8204300	chr17	8204201	8204300	100	-1.28225	0.00309833	1	12	11	0.12	0.11
		chr18:2153401-2153500	chr18	2153401	2153500	100	1.68253	0.00346885	1	2	12	0.02	0.12
		chr18:9105801-9105900	chr18	9105801	9105900	100	-1.547	0.00357911	1	2	15	0.02	0.15
		chr20:10570501-10570600	chr20	10570501	10570600	100	1.20744	0.00454847	1	6	16	0.06	0.16
		chr22:4716001-4716100	chr22	4716001	4716100	100	-1.42492	0.00487006	1	2	13	0.02	0.13
		chr23:2800301-2800400	chr23	2800301	2800400	100	-2.02215	0.00427758	1	3	4	0.03	0.04
		chr26:801301-801400	chr26	801301	801400	100	-1.36028	0.00403557	1	2	8	0.02	0.08
		chr26:1587801-1587900	chr26	1587801	1587900	100	1.36876	0.00370077	1	1	15	0.01	0.15
		chr28:3263201-3263300	chr28	3263201	3263300	100	3.50924	2.33311e-06	0.0163785	7	12	0.07	0.12
		chr28:3263301-3263400	chr28	3263301	3263400	100	3.50924	2.33311e-06	0.0163785	7	12	0.07	0.12
		chr28:3263401-3263500	chr28	3263401	3263500	100	2.02114	0.000640231	1	5	10	0.05	0.1
	ROI	chr1:61077945-61078198	chr1	61077945	61078198	254	2.92249	0.00123361	0.891373	16	31	0.0629921	0.122047
		chr2:189007-189224	chr2	189007	189224	218	1.42508	0.00232067	1	11	22	0.0504587	0.100917
		chr4:740034-740180	chr4	740034	740180	147	1.47415	0.00435779	1	1	14	0.00680272	0.0952381
		chr4:1212081-1212352	chr4	1212081	1212352	272	-1.25996	0.00314736	1	6	26	0.0220588	0.0955882
		chr4:85246930-85247063	chr4	85246930	85247063	134	1.53958	0.0033561	1	0	13	0	0.0970149
		chr6:17299560-17299780	chr6	17299560	17299780	221	1.99876	0.000692848	0.584071	4	21	0.0180995	0.0950226
		chr8:5191540-5191738	chr8	5191540	5191738	199	1.80182	0.00209819	1	18	32	0.0904523	0.160804
		chr9:3693375-3694655	chr9	3693375	3694655	1281	1.43442	0.000476074	0.584071	44	115	0.0343482	0.0897736
		chr11:1715302-1715998	chr11	1715302	1715998	697	1.45396	0.00247434	1	9	49	0.0129125	0.0703013
		chr12:2700294-2700543	chr12	2700294	2700543	250	-1.1214	0.000630473	0.584071	11	34	0.044	0.136
		chr12:16285799-16286230	chr12	16285799	16286230	432	1.3957	0.00499489	1	7	43	0.0162037	0.099537
		chr12:16763013-16763444	chr12	16763013	16763444	432	1.38846	0.00326746	1	16	46	0.037037	0.106481
		chr14:4134485-4134909	chr14	4134485	4134909	425	1.25326	0.00209327	1	45	59	0.105882	0.138824
		chr18:10291116-10291837	chr18	10291116	10291837	722	1.61297	0.00153559	0.970877	41	76	0.0567867	0.105263
		chr26:3262317-3263255	chr26	3262317	3263255	939	1.64827	5.90644e-05	0.149374	30	87	0.0319489	0.0926518
		chr28:3263299-3263412	chr28	3263299	3263412	114	3.42667	3.39683e-06	0.0171812	9	15	0.0789474	0.131579
		chrZ:7337093-7337617	chrZ	7337093	7337617	525	1.47372	0.00047576	0.584071	6	47	0.0114286	0.0895238
SW	ADJW	chr1:194380101-194380200	chr1	194380101	194380200	100	-2.60131	0.00337806	1	5	9	0.05	0.09
		chr5:5717601-5717700	chr5	5717601	5717700	100	3.88876	0.00270069	1	2	15	0.02	0.15
		chr5:58588001-58588100	chr5	58588001	58588100	100	-4.16416	0.00391676	1	3	4	0.03	0.04
		chr7:93201-93300	chr7	93201	93300	100	-3.38424	0.00429264	1	2	8	0.02	0.08
		chr8:9011101-9011200	chr8	9011101	9011200	100	2.48631	0.00166243	1	1	11	0.01	0.11
		chr8:9011201-9011300	chr8	9011201	9011300	100	2.87277	0.00473803	1	2	9	0.02	0.09
		chr10:17093801-17093900	chr10	17093801	17093900	100	2.82096	0.00422402	1	2	6	0.02	0.06
		chr10:17093901-17094000	chr10	17093901	17094000	100	2.82095	0.004223	1	0	5	0	0.05
		chr11:2772601-2772700	chr11	2772601	2772700	100	-2.09792	0.00396641	1	1	7	0.01	0.07
		chr11:2772701-2772800	chr11	2772701	2772800	100	-2.09792	0.00396447	1	2	10	0.02	0.1
		chr11:2772801-2772900	chr11	2772801	2772900	100	-2.09792	0.00396439	1	3	6	0.03	0.06
		chr11:2772901-2773000	chr11	2772901	2773000	100	-2.09792	0.00396432	1	0	11	0	0.11
		chr11:19110401-19110500	chr11	19110401	19110500	100	-4.04164	0.0030587	1	5	9	0.05	0.09
		chr12:1585601-1585700	chr12	1585601	1585700	100	-4.396	0.000515546	0.748676	2	12	0.02	0.12
		chr12:1585701-1585800	chr12	1585701	1585800	100	-4.396	0.000515528	0.748676	4	9	0.04	0.09
		chr12:1585801-1585900	chr12	1585801	1585900	100	-4.39601	0.00051551	0.748676	1	4	0.01	0.04
		chr12:1585901-1586000	chr12	1585901	1586000	100	-3.26212	0.003443	1	2	15	0.02	0.15
		chr12:9294001-9294100	chr12	9294001	9294100	100	-5.09457	0.000788381	0.880682	1	5	0.01	0.05
		chr12:9294101-9294200	chr12	9294101	9294200	100	-5.09457	0.000788095	0.880682	0	2	0	0.02
		chr12:9294201-9294300	chr12	9294201	9294300	100	-5.09457	0.000787445	0.880682	0	5	0	0.05
		chr14:12337401-12337500	chr14	12337401	12337500	100	3.23263	0.000192626	0.399615	3	10	0.03	0.1
		chr15:11167001-11167100	chr15	11167001	11167100	100	2.93046	0.00315768	1	7	7	0.07	0.07
		chr15:11167101-11167200	chr15	11167101	11167200	100	2.93044	0.00315437	1	7	12	0.07	0.12
		chr15:11167201-11167300	chr15	11167201	11167300	100	2.93042	0.00315169	1	6	10	0.06	0.1
		chr17:590401-590500	chr17	590401	590500	100	1.74322	0.00471669	1	2	12	0.02	0.12
		chr17:590501-590600	chr17	590501	590600	100	1.7432	0.00471179	1	3	9	0.03	0.09
		chr20:49001-49100	chr20	49001	49100	100	-2.20714	0.00139874	1	3	8	0.03	0.08
		chr20:49101-49200	chr20	49101	49200	100	-2.20714	0.0013987	1	7	8	0.07	0.08
		chr20:49201-49300	chr20	49201	49300	100	-2.20714	0.00139866	1	4	8	0.04	0.08
		chr20:49301-49400	chr20	49301	49400	100	-4.3565	4.1846e-05	0.202562	5	9	0.05	0.09
		chr20:49401-49500	chr20	49401	49500	100	-4.35652	4.18046e-05	0.202562	13	14	0.13	0.14
		chr20:49501-49600	chr20	49501	49600	100	-4.35653	4.17735e-05	0.202562	6	11	0.06	0.11
		chr20:10528001-10528100	chr20	10528001	10528100	100	-3.81182	0.00362111	1	2	11	0.02	0.11
		chr20:10528101-10528200	chr20	10528101	10528200	100	-3.81182	0.00362215	1	3	8	0.03	0.08
		chr20:10528201-10528300	chr20	10528201	10528300	100	-3.81183	0.00362351	1	6	13	0.06	0.13
		chr26:3554101-3554200	chr26	3554101	3554200	100	4.13154	0.00374107	1	5	12	0.05	0.12
		chr26:4552801-4552900	chr26	4552801	4552900	100	4.80805	0.0043612	1	1	9	0.01	0.09
		chr26:4552901-4553000	chr26	4552901	4553000	100	4.80805	0.00435778	1	0	0	0	0
		chr26:4553001-4553100	chr26	4553001	4553100	100	4.80805	0.00435411	1	0	0	0	0
		chr26:4553101-4553200	chr26	4553101	4553200	100	4.80805	0.00435186	1	1	2	0.01	0.02
		chr28:1400701-1400800	chr28	1400701	1400800	100	-3.95937	0.0027305	1	7	9	0.07	0.09
		chrZ:16929601-16929700	chrZ	16929601	16929700	100	-4.09289	0.00318236	1	12	13	0.12	0.13
		chrZ:16929701-16929800	chrZ	16929701	16929800	100	-4.09288	0.00318342	1	6	13	0.06	0.13
		chrZ:16929801-16929900	chrZ	16929801	16929900	100	-4.09289	0.00318214	1	6	11	0.06	0.11
		chrZ:16929901-16930000	chrZ	16929901	16930000	100	-4.01321	0.00490475	1	5	13	0.05	0.13
		chrZ:34309801-34309900	chrZ	34309801	34309900	100	-2.83147	0.00312821	1	2	10	0.02	0.1
		chrZ:70400401-70400500	chrZ	70400401	70400500	100	-5.38381	0.000145834	0.352966	1	9	0.01	0.09
		chrZ:70400501-70400600	chrZ	70400501	70400600	100	-5.38381	0.000145786	0.352966	0	6	0	0.06
		chrZ:70400601-70400700	chrZ	70400601	70400700	100	-5.38381	0.000145743	0.352966	1	1	0.01	0.01
		chrZ:75034101-75034200	chrZ	75034101	75034200	100	-2.407	0.00120223	1	0	8	0	0.08
		chrZ:75034201-75034300	chrZ	75034201	75034300	100	-2.40699	0.00120183	1	2	11	0.02	0.11
		chrZ:77951601-77951700	chrZ	77951601	77951700	100	-2.63379	0.00297869	1	4	15	0.04	0.15
		chrZ:77951701-77951800	chrZ	77951701	77951800	100	-2.63381	0.00297702	1	3	10	0.03	0.1
		chrZ:77951801-77951900	chrZ	77951801	77951900	100	-2.63381	0.00297682	1	3	10	0.03	0.1
		chrZ:77951901-77952000	chrZ	77951901	77952000	100	-2.63381	0.0029775	1	3	10	0.03	0.1
		chrZ:78491201-78491300	chrZ	78491201	78491300	100	-3.2902	0.00303058	1	4	11	0.04	0.11
		chrZ:82240701-82240800	chrZ	82240701	82240800	100	2.33958	0.00202911	1	1	10	0.01	0.1
	ROI	chr2:66704195-66704415	chr2	66704195	66704415	221	5.46668	0.00035556	0.353427	4	11	0.0180995	0.0497738
		chr5:5717497-5717944	chr5	5717497	5717944	448	3.8803	0.00423109	0.479019	9	51	0.0200893	0.113839
		chr5:48281849-48282123	chr5	48281849	48282123	275	4.49044	0.00461265	0.479019	16	30	0.0581818	0.109091
		chr14:12337347-12337639	chr14	12337347	12337639	293	3.23422	0.000929323	0.461874	10	34	0.0341297	0.116041
		chr26:3554060-3554373	chr26	3554060	3554373	314	4.17775	0.00184965	0.479019	15	32	0.0477707	0.101911
		chr26:4552858-4553138	chr26	4552858	4553138	281	4.774	0.00218284	0.479019	0	4	0	0.0142349
	*red color represents overlap between ADJW and ROI

## Sheet: P<0.05
Early / Stressed vs Control	Test	Location	chr	start	end	width	logFC	p.value	adj.p	CpGs	GpCs		DMRs	BR			SW
BR	ADJW	chr1:430001-430100	chr1	430001	430100	100	1.02227	0.00910298	1	3	13			Overlap	Total	%	Overlap	Total	%
		chr1:483801-483900	chr1	483801	483900	100	-0.962253	0.0470961	1	0	7		ADJW	128	359	35.6546	110	561	19.6078
		chr1:49533501-49533600	chr1	49533501	49533600	100	-1.74389	0.012095	1	3	9		ROI	96	154	62.3377	45	91	49.4505
		chr1:49533601-49533700	chr1	49533601	49533700	100	-1.41968	0.0281469	1	2	8
		chr1:51015701-51015800	chr1	51015701	51015800	100	-2.45815	0.00894328	1	4	13
		chr1:51015801-51015900	chr1	51015801	51015900	100	-2.45815	0.00894328	1	5	8
		chr1:51015901-51016000	chr1	51015901	51016000	100	-2.45815	0.00894328	1	1	4
		chr1:51931401-51931500	chr1	51931401	51931500	100	-1.42419	0.00901054	1	1	6
		chr1:61077901-61078000	chr1	61077901	61078000	100	3.18001	2.24433e-05	0.105035	4	11
		chr1:61078001-61078100	chr1	61078001	61078100	100	3.4487	0.000295176	0.828855	9	13
		chr1:61078101-61078200	chr1	61078101	61078200	100	3.4487	0.000295176	0.828855	6	12
		chr1:109993401-109993500	chr1	109993401	109993500	100	-1.2712	0.0222938	1	3	12
		chr1:111368701-111368800	chr1	111368701	111368800	100	0.910258	0.0493559	1	5	11
		chr1:126881601-126881700	chr1	126881601	126881700	100	1.3224	0.0308995	1	0	12
		chr1:126881701-126881800	chr1	126881701	126881800	100	1.3224	0.0308976	1	4	12
		chr1:164901501-164901600	chr1	164901501	164901600	100	1.9399	0.00935984	1	2	12
		chr1:185242101-185242200	chr1	185242101	185242200	100	2.18188	0.0150923	1	1	11
		chr1:185242201-185242300	chr1	185242201	185242300	100	2.18188	0.0150923	1	0	5
		chr1:185242301-185242400	chr1	185242301	185242400	100	2.18188	0.0150923	1	1	5
		chr1:194436201-194436300	chr1	194436201	194436300	100	-0.752262	0.048966	1	11	16
		chr1:194651201-194651300	chr1	194651201	194651300	100	1.33084	0.00418138	1	3	8
		chr1:194862201-194862300	chr1	194862201	194862300	100	-0.887536	0.0431227	1	8	9
		chr1:195494701-195494800	chr1	195494701	195494800	100	-1.6502	0.00433576	1	1	13
		chr2:175801-175900	chr2	175801	175900	100	1.16666	0.0314729	1	10	13
		chr2:189101-189200	chr2	189101	189200	100	1.52602	0.00166332	1	7	13
		chr2:454401-454500	chr2	454401	454500	100	-1.16167	0.0411476	1	1	6
		chr2:600401-600500	chr2	600401	600500	100	1.13572	0.0469594	1	6	9
		chr2:34443301-34443400	chr2	34443301	34443400	100	1.16427	0.0289854	1	0	8
		chr2:37324601-37324700	chr2	37324601	37324700	100	-1.07077	0.0162509	1	4	11
		chr2:56377901-56378000	chr2	56377901	56378000	100	-1.01474	0.0359191	1	3	5
		chr2:56378001-56378100	chr2	56378001	56378100	100	-1.01474	0.0359168	1	2	11
		chr2:75881901-75882000	chr2	75881901	75882000	100	1.03189	0.0496925	1	1	12
		chr2:125335601-125335700	chr2	125335601	125335700	100	1.31938	0.0114127	1	0	7
		chr2:126103201-126103300	chr2	126103201	126103300	100	-1.05726	0.0468341	1	3	9
		chr3:2439101-2439200	chr3	2439101	2439200	100	0.44683	0.0467652	1	3	8
		chr3:2439201-2439300	chr3	2439201	2439300	100	0.89525	0.0139848	1	2	8
		chr3:2439301-2439400	chr3	2439301	2439400	100	0.801855	0.0403097	1	4	13
		chr3:12542901-12543000	chr3	12542901	12543000	100	-0.94246	0.0330337	1	1	13
		chr3:22239501-22239600	chr3	22239501	22239600	100	-0.813755	0.0364313	1	3	12
		chr3:25898301-25898400	chr3	25898301	25898400	100	-0.962269	0.0470961	1	3	8
		chr3:30327601-30327700	chr3	30327601	30327700	100	1.23109	0.0135837	1	3	16
		chr3:30327801-30327900	chr3	30327801	30327900	100	1.11341	0.0240749	1	2	7
		chr3:79617601-79617700	chr3	79617601	79617700	100	-1.06386	0.0477258	1	1	6
		chr3:91945501-91945600	chr3	91945501	91945600	100	1.02946	0.0161322	1	1	12
		chr3:97197201-97197300	chr3	97197201	97197300	100	2.02335	0.0170192	1	2	9
		chr3:97197301-97197400	chr3	97197301	97197400	100	2.46009	0.00473424	1	3	8
		chr3:97197401-97197500	chr3	97197401	97197500	100	2.38	0.00629697	1	2	10
		chr3:97511101-97511200	chr3	97511101	97511200	100	-1.11377	0.0171029	1	1	12
		chr3:104818001-104818100	chr3	104818001	104818100	100	1.15069	0.0230733	1	2	5
		chr3:105930201-105930300	chr3	105930201	105930300	100	0.906464	0.0264615	1	6	11
		chr4:601401-601500	chr4	601401	601500	100	-1.57737	0.0153568	1	0	12
		chr4:630401-630500	chr4	630401	630500	100	-1.44552	0.0206295	1	4	7
		chr4:740001-740100	chr4	740001	740100	100	1.32997	0.00326885	1	1	5
		chr4:1041001-1041100	chr4	1041001	1041100	100	-1.1442	0.0221293	1	3	10
		chr4:1041101-1041200	chr4	1041101	1041200	100	-1.24526	0.0120828	1	1	4
		chr4:1212101-1212200	chr4	1212101	1212200	100	-1.40889	0.0121822	1	2	7
		chr4:1734901-1735000	chr4	1734901	1735000	100	0.894885	0.0443231	1	3	10
		chr4:2018301-2018400	chr4	2018301	2018400	100	0.853721	0.034733	1	3	11
		chr4:2331901-2332000	chr4	2331901	2332000	100	1.30839	0.0180843	1	5	13
		chr4:2540601-2540700	chr4	2540601	2540700	100	1.05453	0.0391931	1	2	9
		chr4:4253301-4253400	chr4	4253301	4253400	100	1.25643	0.00244166	1	5	9
		chr4:4308401-4308500	chr4	4308401	4308500	100	-1.06452	0.0344284	1	3	11
		chr4:10787101-10787200	chr4	10787101	10787200	100	-1.36592	0.00465771	1	0	14
		chr4:11739701-11739800	chr4	11739701	11739800	100	-1.19534	0.0340039	1	7	15
		chr4:14214901-14215000	chr4	14214901	14215000	100	1.24382	0.0202032	1	2	8
		chr4:66101601-66101700	chr4	66101601	66101700	100	1.16693	0.0291184	1	5	10
		chr4:74061401-74061500	chr4	74061401	74061500	100	0.859428	0.0400607	1	5	15
		chr4:80131401-80131500	chr4	80131401	80131500	100	1.37879	0.0138862	1	0	6
		chr4:85246901-85247000	chr4	85246901	85247000	100	1.63454	0.00209777	1	1	11
		chr4:85247001-85247100	chr4	85247001	85247100	100	1.63454	0.00209805	1	0	6
		chr4:86296801-86296900	chr4	86296801	86296900	100	0.731712	0.0456393	1	0	11
		chr4:86296901-86297000	chr4	86296901	86297000	100	0.73171	0.0456179	1	1	5
		chr4:89848301-89848400	chr4	89848301	89848400	100	1.03983	0.0288625	1	0	11
		chr4:91247201-91247300	chr4	91247201	91247300	100	1.56688	0.00828763	1	2	11
		chr5:390201-390300	chr5	390201	390300	100	1.64053	0.00554895	1	5	11
		chr5:5684301-5684400	chr5	5684301	5684400	100	0.901783	0.00180506	1	3	11
		chr5:5684401-5684500	chr5	5684401	5684500	100	0.842288	0.00671139	1	6	12
		chr5:16850201-16850300	chr5	16850201	16850300	100	0.681632	0.0281325	1	6	12
		chr5:16884601-16884700	chr5	16884601	16884700	100	-0.715899	0.0480439	1	3	11
		chr5:16884701-16884800	chr5	16884701	16884800	100	-0.715899	0.0480439	1	9	15
		chr5:16884801-16884900	chr5	16884801	16884900	100	-0.752444	0.0364313	1	3	12
		chr5:16902401-16902500	chr5	16902401	16902500	100	1.0803	0.0278711	1	2	10
		chr5:28794401-28794500	chr5	28794401	28794500	100	1.19174	0.0094973	1	2	10
		chr5:38198401-38198500	chr5	38198401	38198500	100	1.15124	0.0266273	1	2	12
		chr5:39036101-39036200	chr5	39036101	39036200	100	1.2527	0.0220433	1	5	10
		chr5:41191601-41191700	chr5	41191601	41191700	100	1.62875	0.0444698	1	0	5
		chr5:41191701-41191800	chr5	41191701	41191800	100	1.62875	0.0444723	1	0	10
		chr5:41191801-41191900	chr5	41191801	41191900	100	1.62875	0.0444637	1	0	3
		chr5:41191901-41192000	chr5	41191901	41192000	100	1.62875	0.0444635	1	0	8
		chr5:48322001-48322100	chr5	48322001	48322100	100	-1.31685	0.0367952	1	1	14
		chr5:56842101-56842200	chr5	56842101	56842200	100	-0.799419	0.0488461	1	4	9
		chr6:504201-504300	chr6	504201	504300	100	1.07484	0.0375307	1	0	6
		chr6:511101-511200	chr6	511101	511200	100	-0.884703	0.0334702	1	6	15
		chr6:11562201-11562300	chr6	11562201	11562300	100	1.72283	0.000510026	1	9	18
		chr6:11562401-11562500	chr6	11562401	11562500	100	0.820867	0.0243706	1	5	13
		chr6:14916201-14916300	chr6	14916201	14916300	100	-1.52529	0.0236324	1	0	3
		chr6:17299601-17299700	chr6	17299601	17299700	100	2.08764	0.000477387	1	1	9
		chr6:22534001-22534100	chr6	22534001	22534100	100	-1.33536	0.0300832	1	3	11
		chr6:32149601-32149700	chr6	32149601	32149700	100	0.897502	0.0488461	1	2	10
		chr6:34880201-34880300	chr6	34880201	34880300	100	-1.12981	0.00589023	1	3	11
		chr6:34954001-34954100	chr6	34954001	34954100	100	1.43439	0.0207151	1	3	10
		chr7:10606301-10606400	chr7	10606301	10606400	100	1.22172	0.0307087	1	2	11
		chr7:22334101-22334200	chr7	22334101	22334200	100	1.07683	0.0442107	1	4	9
		chr7:23375601-23375700	chr7	23375601	23375700	100	-1.41298	0.0039433	1	4	13
		chr7:26399801-26399900	chr7	26399801	26399900	100	1.19174	0.0094973	1	1	6
		chr7:28528401-28528500	chr7	28528401	28528500	100	0.912662	0.0141584	1	6	12
		chr7:35875201-35875300	chr7	35875201	35875300	100	-0.969187	0.0315977	1	1	6
		chr7:36453001-36453100	chr7	36453001	36453100	100	1.47904	0.0028589	1	2	10
		chr7:36453101-36453200	chr7	36453101	36453200	100	1.28435	0.0148667	1	2	10
		chr7:36471401-36471500	chr7	36471401	36471500	100	-1.10018	0.041248	1	4	12
		chr8:3901501-3901600	chr8	3901501	3901600	100	-1.15588	0.00742411	1	3	12
		chr8:3901601-3901700	chr8	3901601	3901700	100	-1.87514	0.00155738	1	6	15
		chr8:5304501-5304600	chr8	5304501	5304600	100	1.19941	0.0247098	1	9	18
		chr8:20463901-20464000	chr8	20463901	20464000	100	0.804539	0.0440529	1	2	9
		chr8:24023201-24023300	chr8	24023201	24023300	100	-1.01487	0.0275837	1	4	11
		chr8:24335001-24335100	chr8	24335001	24335100	100	1.17772	0.0118877	1	4	15
		chr8:25360801-25360900	chr8	25360801	25360900	100	-1.01737	0.0382689	1	7	15
		chr8:28563001-28563100	chr8	28563001	28563100	100	1.23585	0.0146603	1	7	10
		chr8:29628901-29629000	chr8	29628901	29629000	100	1.00762	0.04575	1	0	6
		chr9:952901-953000	chr9	952901	953000	100	0.990155	0.0371007	1	0	9
		chr9:2329301-2329400	chr9	2329301	2329400	100	1.25889	0.00965749	1	6	15
		chr9:3405201-3405300	chr9	3405201	3405300	100	-0.852659	0.0212735	1	0	8
		chr9:12940001-12940100	chr9	12940001	12940100	100	-1.09716	0.0350463	1	5	10
		chr9:12940101-12940200	chr9	12940101	12940200	100	-1.09716	0.0350467	1	9	12
		chr9:14971801-14971900	chr9	14971801	14971900	100	0.877757	0.0301012	1	2	10
		chr9:15031501-15031600	chr9	15031501	15031600	100	-1.17239	0.0484905	1	4	8
		chr9:15041401-15041500	chr9	15041401	15041500	100	1.09968	0.0427806	1	0	9
		chr9:15923601-15923700	chr9	15923601	15923700	100	0.83455	0.0448771	1	10	20
		chr9:22935901-22936000	chr9	22935901	22936000	100	1.2795	0.0105995	1	4	9
		chr9:22936001-22936100	chr9	22936001	22936100	100	1.17779	0.00793655	1	3	5
		chr9:23066601-23066700	chr9	23066601	23066700	100	1.03213	0.0237457	1	1	7
		chr9:23828001-23828100	chr9	23828001	23828100	100	1.30602	0.0129955	1	1	7
		chr10:788801-788900	chr10	788801	788900	100	1.10015	0.0345998	1	2	12
		chr10:11429401-11429500	chr10	11429401	11429500	100	1.15729	0.0222156	1	1	13
		chr10:19929401-19929500	chr10	19929401	19929500	100	0.937534	0.0437633	1	1	8
		chr10:19958401-19958500	chr10	19958401	19958500	100	1.17781	0.0119589	1	3	13
		chr10:20019901-20020000	chr10	20019901	20020000	100	1.51763	0.00627765	1	3	12
		chr10:20041401-20041500	chr10	20041401	20041500	100	1.54539	0.0122265	1	2	14
		chr10:20125401-20125500	chr10	20125401	20125500	100	1.35076	0.0304168	1	4	12
		chr11:458201-458300	chr11	458201	458300	100	1.6256	0.00259301	1	3	9
		chr11:486001-486100	chr11	486001	486100	100	1.21138	0.0407207	1	2	15
		chr11:598901-599000	chr11	598901	599000	100	-0.921805	0.0436289	1	10	15
		chr11:1774601-1774700	chr11	1774601	1774700	100	0.948767	0.0311953	1	4	13
		chr11:2046601-2046700	chr11	2046601	2046700	100	1.26075	0.0185764	1	3	5
		chr11:18545401-18545500	chr11	18545401	18545500	100	0.955251	0.0420127	1	4	11
		chr11:18696801-18696900	chr11	18696801	18696900	100	1.08106	0.0445329	1	11	10
		chr11:18873301-18873400	chr11	18873301	18873400	100	1.88464	0.00584576	1	5	13
		chr11:18915301-18915400	chr11	18915301	18915400	100	-1.01471	0.033606	1	3	13
		chr11:19110301-19110400	chr11	19110301	19110400	100	1.02943	0.0161322	1	5	11
		chr12:1471501-1471600	chr12	1471501	1471600	100	0.935768	0.0401158	1	5	8
		chr12:2700001-2700100	chr12	2700001	2700100	100	-0.822597	0.048966	1	3	12
		chr12:2700101-2700200	chr12	2700101	2700200	100	-1.27164	0.0112985	1	3	12
		chr12:2700401-2700500	chr12	2700401	2700500	100	-0.954337	0.0112305	1	4	8
		chr12:2904501-2904600	chr12	2904501	2904600	100	-1.03518	0.035196	1	2	14
		chr12:2904601-2904700	chr12	2904601	2904700	100	-0.950831	0.0338529	1	3	10
		chr12:11524601-11524700	chr12	11524601	11524700	100	1.09125	0.0313187	1	6	7
		chr12:11593401-11593500	chr12	11593401	11593500	100	0.860973	0.0433338	1	6	14
		chr12:11624401-11624500	chr12	11624401	11624500	100	1.16292	0.00947815	1	5	14
		chr12:14536501-14536600	chr12	14536501	14536600	100	1.24493	0.0245382	1	1	14
		chr12:16346201-16346300	chr12	16346201	16346300	100	1.15705	0.0328661	1	3	12
		chr12:16763201-16763300	chr12	16763201	16763300	100	1.47821	0.00368775	1	6	13
		chr13:1075101-1075200	chr13	1075101	1075200	100	1.15355	0.031338	1	1	7
		chr13:1078801-1078900	chr13	1078801	1078900	100	1.25407	0.0220481	1	1	13
		chr13:1932901-1933000	chr13	1932901	1933000	100	0.948812	0.0291549	1	3	9
		chr13:2194901-2195000	chr13	2194901	2195000	100	1.12621	0.0272357	1	1	9
		chr13:7144301-7144400	chr13	7144301	7144400	100	-1.25237	0.0313732	1	3	7
		chr13:9223301-9223400	chr13	9223301	9223400	100	-1.01099	0.0457675	1	1	10
		chr13:9223501-9223600	chr13	9223501	9223600	100	-1.40489	0.0113249	1	5	7
		chr13:13971801-13971900	chr13	13971801	13971900	100	-1.17623	0.036588	1	2	9
		chr13:16026601-16026700	chr13	16026601	16026700	100	1.37663	0.0164226	1	4	11
		chr13:17011401-17011500	chr13	17011401	17011500	100	-1.33661	0.00304871	1	14	18
		chr13:17011501-17011600	chr13	17011501	17011600	100	-1.20983	0.0292295	1	16	13
		chr13:17011601-17011700	chr13	17011601	17011700	100	-1.20983	0.0292266	1	14	14
		chr13:17011701-17011800	chr13	17011701	17011800	100	-1.20983	0.0292257	1	15	21
		chr13:18395501-18395600	chr13	18395501	18395600	100	1.30694	0.00405956	1	1	9
		chr14:3078601-3078700	chr14	3078601	3078700	100	-1.37871	0.0136525	1	1	8
		chr14:3957501-3957600	chr14	3957501	3957600	100	1.15069	0.0277454	1	3	6
		chr14:4134701-4134800	chr14	4134701	4134800	100	1.35599	0.000791088	1	10	16
		chr14:5100801-5100900	chr14	5100801	5100900	100	-1.23585	0.0271079	1	6	8
		chr14:5100901-5101000	chr14	5100901	5101000	100	-1.23585	0.0271049	1	3	5
		chr14:5101001-5101100	chr14	5101001	5101100	100	-1.23585	0.0271001	1	3	10
		chr14:5380601-5380700	chr14	5380601	5380700	100	1.39243	0.0321463	1	1	15
		chr14:6566501-6566600	chr14	6566501	6566600	100	0.985104	0.0276584	1	0	10
		chr14:6911301-6911400	chr14	6911301	6911400	100	1.48265	0.0226515	1	5	13
		chr14:6911401-6911500	chr14	6911401	6911500	100	1.11316	0.0187739	1	5	11
		chr14:12779301-12779400	chr14	12779301	12779400	100	1.02582	0.0279116	1	1	11
		chr14:13126801-13126900	chr14	13126801	13126900	100	1.8374	0.0026097	1	4	11
		chr15:1594201-1594300	chr15	1594201	1594300	100	1.07096	0.0192834	1	5	11
		chr15:1594301-1594400	chr15	1594301	1594400	100	0.954511	0.0394265	1	1	12
		chr15:4610801-4610900	chr15	4610801	4610900	100	1.57099	0.00489396	1	1	4
		chr15:5299301-5299400	chr15	5299301	5299400	100	1.14076	0.0349423	1	0	10
		chr15:8004001-8004100	chr15	8004001	8004100	100	1.15936	0.0283259	1	1	8
		chr15:8004101-8004200	chr15	8004101	8004200	100	1.57045	0.000682157	1	0	9
		chr15:10027001-10027100	chr15	10027001	10027100	100	-1.21257	0.0368886	1	5	15
		chr15:10853101-10853200	chr15	10853101	10853200	100	1.57097	0.00932418	1	3	13
		chr15:10918401-10918500	chr15	10918401	10918500	100	0.985136	0.0275837	1	11	12
		chr15:11350201-11350300	chr15	11350201	11350300	100	-1.24815	0.0453156	1	7	8
		chr15:11350301-11350400	chr15	11350301	11350400	100	-1.28394	0.034146	1	9	7
		chr15:12647701-12647800	chr15	12647701	12647800	100	-1.15803	0.0260134	1	5	13
		chr17:996801-996900	chr17	996801	996900	100	1.56193	0.03153	1	2	7
		chr17:1822501-1822600	chr17	1822501	1822600	100	1.61087	0.00197258	1	1	7
		chr17:1822601-1822700	chr17	1822601	1822700	100	1.36788	0.0131674	1	3	10
		chr17:2296901-2297000	chr17	2296901	2297000	100	-1.23662	0.00561623	1	1	8
		chr17:3920801-3920900	chr17	3920801	3920900	100	1.33979	0.0141657	1	0	11
		chr17:3990501-3990600	chr17	3990501	3990600	100	-1.49865	0.039388	1	3	13
		chr17:5994201-5994300	chr17	5994201	5994300	100	1.08902	0.024259	1	7	11
		chr17:5994301-5994400	chr17	5994301	5994400	100	1.08902	0.0242576	1	3	7
		chr17:6506101-6506200	chr17	6506101	6506200	100	-1.0215	0.0459764	1	7	13
		chr17:6506201-6506300	chr17	6506201	6506300	100	-1.215	0.0209049	1	7	15
		chr17:7498001-7498100	chr17	7498001	7498100	100	-0.927544	0.0357641	1	0	6
		chr17:7803601-7803700	chr17	7803601	7803700	100	0.944865	0.020573	1	2	11
		chr17:7803701-7803800	chr17	7803701	7803800	100	0.944867	0.020569	1	4	11
		chr17:7803801-7803900	chr17	7803801	7803900	100	0.864904	0.0492543	1	3	10
		chr17:7831501-7831600	chr17	7831501	7831600	100	-1.18708	0.0357805	1	1	3
		chr17:7831601-7831700	chr17	7831601	7831700	100	-1.18708	0.0357788	1	0	7
		chr17:8204201-8204300	chr17	8204201	8204300	100	-1.28225	0.00309833	1	12	11
		chr17:8719601-8719700	chr17	8719601	8719700	100	0.940477	0.0498462	1	4	9
		chr17:8719701-8719800	chr17	8719701	8719800	100	1.01607	0.0320943	1	1	11
		chr17:9051301-9051400	chr17	9051301	9051400	100	1.15123	0.039086	1	3	14
		chr17:9251101-9251200	chr17	9251101	9251200	100	1.31476	0.0109662	1	3	12
		chr17:10348701-10348800	chr17	10348701	10348800	100	-0.962237	0.0470961	1	1	9
		chr18:107601-107700	chr18	107601	107700	100	-0.622684	0.0325943	1	1	7
		chr18:2038801-2038900	chr18	2038801	2038900	100	1.06141	0.0320102	1	0	8
		chr18:2070501-2070600	chr18	2070501	2070600	100	-1.34333	0.0197188	1	1	14
		chr18:2153401-2153500	chr18	2153401	2153500	100	1.68253	0.00346885	1	2	12
		chr18:6015501-6015600	chr18	6015501	6015600	100	-1.10581	0.0163488	1	2	8
		chr18:7499901-7500000	chr18	7499901	7500000	100	-1.01612	0.0185377	1	4	11
		chr18:8049301-8049400	chr18	8049301	8049400	100	1.21307	0.0311838	1	4	12
		chr18:9026901-9027000	chr18	9026901	9027000	100	-1.41825	0.00543745	1	3	13
		chr18:9027001-9027100	chr18	9027001	9027100	100	-1.51639	0.017046	1	5	15
		chr18:9034501-9034600	chr18	9034501	9034600	100	0.983404	0.0494286	1	4	5
		chr18:9105801-9105900	chr18	9105801	9105900	100	-1.547	0.00357911	1	2	15
		chr18:9105901-9106000	chr18	9105901	9106000	100	-1.11169	0.0259433	1	0	12
		chr18:9126301-9126400	chr18	9126301	9126400	100	0.891935	0.0436289	1	1	11
		chr18:9898701-9898800	chr18	9898701	9898800	100	-1.18254	0.0127846	1	7	14
		chr18:9898801-9898900	chr18	9898801	9898900	100	-1.18254	0.0127839	1	1	13
		chr18:10922001-10922100	chr18	10922001	10922100	100	1.20789	0.0406165	1	4	8
		chr18:10938201-10938300	chr18	10938201	10938300	100	-0.963935	0.0462366	1	0	11
		chr19:94801-94900	chr19	94801	94900	100	1.21806	0.0298457	1	6	11
		chr19:344801-344900	chr19	344801	344900	100	1.52138	0.00513286	1	0	10
		chr19:2740901-2741000	chr19	2740901	2741000	100	0.819207	0.029243	1	3	6
		chr19:4087801-4087900	chr19	4087801	4087900	100	-1.15239	0.00958492	1	1	9
		chr19:4884701-4884800	chr19	4884701	4884800	100	1.04387	0.0455324	1	4	9
		chr19:5118901-5119000	chr19	5118901	5119000	100	-1.23696	0.0113542	1	1	6
		chr19:5385901-5386000	chr19	5385901	5386000	100	-1.37516	0.0137795	1	8	8
		chr19:5731401-5731500	chr19	5731401	5731500	100	-1.32658	0.0340284	1	4	9
		chr19:5949701-5949800	chr19	5949701	5949800	100	1.08474	0.023746	1	4	10
		chr19:7346301-7346400	chr19	7346301	7346400	100	1.63589	0.00682218	1	0	12
		chr19:9618201-9618300	chr19	9618201	9618300	100	1.302	0.0160989	1	1	13
		chr20:49501-49600	chr20	49501	49600	100	-1.34216	0.00927089	1	6	11
		chr20:479901-480000	chr20	479901	480000	100	0.982128	0.0480987	1	0	13
		chr20:504501-504600	chr20	504501	504600	100	-0.962255	0.0470961	1	1	11
		chr20:875801-875900	chr20	875801	875900	100	-1.11278	0.0409649	1	0	7
		chr20:1488401-1488500	chr20	1488401	1488500	100	-0.752251	0.048966	1	4	10
		chr20:1488501-1488600	chr20	1488501	1488600	100	-0.752251	0.048966	1	5	16
		chr20:1488601-1488700	chr20	1488601	1488700	100	-0.752251	0.048966	1	7	18
		chr20:2005901-2006000	chr20	2005901	2006000	100	1.02964	0.0473272	1	2	10
		chr20:2006001-2006100	chr20	2006001	2006100	100	1.02964	0.0473234	1	1	8
		chr20:5683701-5683800	chr20	5683701	5683800	100	0.325827	0.0493661	1	3	11
		chr20:7755901-7756000	chr20	7755901	7756000	100	-1.16592	0.0385241	1	0	11
		chr20:10127601-10127700	chr20	10127601	10127700	100	0.985143	0.0275837	1	2	9
		chr20:10382101-10382200	chr20	10382101	10382200	100	-1.55085	0.0128826	1	3	9
		chr20:10439001-10439100	chr20	10439001	10439100	100	-0.904214	0.0205018	1	2	12
		chr20:10570501-10570600	chr20	10570501	10570600	100	1.20744	0.00454847	1	6	16
		chr20:10604001-10604100	chr20	10604001	10604100	100	-1.20004	0.0117913	1	10	18
		chr20:10886101-10886200	chr20	10886101	10886200	100	1.12504	0.0241488	1	2	11
		chr20:13387801-13387900	chr20	13387801	13387900	100	1.39208	0.00855933	1	1	6
		chr21:666201-666300	chr21	666201	666300	100	-1.49822	0.0125242	1	4	12
		chr21:2844201-2844300	chr21	2844201	2844300	100	-0.972691	0.0227179	1	2	11
		chr21:3023401-3023500	chr21	3023401	3023500	100	1.35475	0.00846004	1	2	9
		chr21:3449201-3449300	chr21	3449201	3449300	100	1.3917	0.0122704	1	3	7
		chr21:3449301-3449400	chr21	3449301	3449400	100	1.24744	0.0431852	1	3	7
		chr21:5208201-5208300	chr21	5208201	5208300	100	-1.37512	0.00970189	1	2	12
		chr22:455901-456000	chr22	455901	456000	100	1.56189	0.00971368	1	0	9
		chr22:2234001-2234100	chr22	2234001	2234100	100	-1.19906	0.0191279	1	2	12
		chr22:2538701-2538800	chr22	2538701	2538800	100	1.09229	0.0201103	1	0	5
		chr22:2822301-2822400	chr22	2822301	2822400	100	0.702631	0.0308909	1	9	17
		chr22:2822401-2822500	chr22	2822401	2822500	100	0.702631	0.0308909	1	10	17
		chr22:3576201-3576300	chr22	3576201	3576300	100	1.54331	0.0210366	1	2	10
		chr22:4716001-4716100	chr22	4716001	4716100	100	-1.42492	0.00487006	1	2	13
		chr22:4716201-4716300	chr22	4716201	4716300	100	-1.19183	0.00902423	1	6	15
		chr23:1403001-1403100	chr23	1403001	1403100	100	-1.3529	0.0162731	1	1	6
		chr23:1685701-1685800	chr23	1685701	1685800	100	-1.11218	0.029513	1	0	8
		chr23:1685801-1685900	chr23	1685801	1685900	100	-1.53133	0.0145728	1	2	10
		chr23:1921601-1921700	chr23	1921601	1921700	100	0.921229	0.0422959	1	4	8
		chr23:2550501-2550600	chr23	2550501	2550600	100	-1.33853	0.0144657	1	1	7
		chr23:2768101-2768200	chr23	2768101	2768200	100	-1.01238	0.0388178	1	4	11
		chr23:2800301-2800400	chr23	2800301	2800400	100	-2.02215	0.00427758	1	3	4
		chr23:2800501-2800600	chr23	2800501	2800600	100	-1.43793	0.0160537	1	0	12
		chr23:3891301-3891400	chr23	3891301	3891400	100	-1.50934	0.00954785	1	1	10
		chr23:3891501-3891600	chr23	3891501	3891600	100	-1.42537	0.0148934	1	2	14
		chr23:5065501-5065600	chr23	5065501	5065600	100	0.949926	0.0119674	1	5	12
		chr23:5475101-5475200	chr23	5475101	5475200	100	1.03741	0.0141129	1	5	9
		chr24:252301-252400	chr24	252301	252400	100	0.940013	0.0474938	1	6	10
		chr24:335501-335600	chr24	335501	335600	100	0.904988	0.0393409	1	6	10
		chr24:661401-661500	chr24	661401	661500	100	0.985107	0.0385391	1	7	13
		chr24:2605501-2605600	chr24	2605501	2605600	100	-1.06725	0.0415423	1	0	6
		chr24:4041101-4041200	chr24	4041101	4041200	100	0.874038	0.042541	1	4	7
		chr24:4300701-4300800	chr24	4300701	4300800	100	-1.31058	0.00660144	1	2	14
		chr24:4322601-4322700	chr24	4322601	4322700	100	-0.981481	0.0490456	1	1	12
		chr24:5398901-5399000	chr24	5398901	5399000	100	1.15817	0.0332689	1	3	11
		chr24:5419501-5419600	chr24	5419501	5419600	100	1.19174	0.0138815	1	4	12
		chr24:5419801-5419900	chr24	5419801	5419900	100	1.22086	0.00954365	1	3	12
		chr24:5982101-5982200	chr24	5982101	5982200	100	1.32589	0.0348222	1	0	12
		chr25:34201-34300	chr25	34201	34300	100	-1.00989	0.0437778	1	8	7
		chr25:1377601-1377700	chr25	1377601	1377700	100	1.22435	0.0234442	1	3	8
		chr25:1377701-1377800	chr25	1377701	1377800	100	1.07929	0.034167	1	2	10
		chr25:2713401-2713500	chr25	2713401	2713500	100	1.0911	0.0349426	1	4	5
		chr26:801301-801400	chr26	801301	801400	100	-1.36028	0.00403557	1	2	8
		chr26:870601-870700	chr26	870601	870700	100	1.0259	0.0303519	1	0	10
		chr26:870701-870800	chr26	870701	870800	100	1.06681	0.0247095	1	0	8
		chr26:870801-870900	chr26	870801	870900	100	1.17506	0.0148855	1	1	7
		chr26:870901-871000	chr26	870901	871000	100	1.31951	0.0224055	1	0	8
		chr26:1587801-1587900	chr26	1587801	1587900	100	1.36876	0.00370077	1	1	15
		chr26:3421401-3421500	chr26	3421401	3421500	100	1.42261	0.0200879	1	3	12
		chr26:3503901-3504000	chr26	3503901	3504000	100	-1.10835	0.0184842	1	11	15
		chr27:1677801-1677900	chr27	1677801	1677900	100	2.17928	0.011361	1	1	2
		chr27:1677901-1678000	chr27	1677901	1678000	100	2.17928	0.011361	1	4	2
		chr27:1678001-1678100	chr27	1678001	1678100	100	2.00217	0.00513341	1	2	2
		chr27:2591001-2591100	chr27	2591001	2591100	100	1.02937	0.048398	1	2	12
		chr27:4235601-4235700	chr27	4235601	4235700	100	-0.9781	0.0200665	1	6	13
		chr27:4333301-4333400	chr27	4333301	4333400	100	1.15586	0.0313403	1	3	8
		chr27:4821301-4821400	chr27	4821301	4821400	100	-1.22037	0.0184035	1	3	13
		chr27:4831501-4831600	chr27	4831501	4831600	100	-0.965914	0.0385391	1	11	17
		chr27:4831601-4831700	chr27	4831601	4831700	100	-0.965914	0.0385391	1	9	10
		chr27:4831701-4831800	chr27	4831701	4831800	100	-0.965914	0.0385391	1	5	9
		chr27:5208001-5208100	chr27	5208001	5208100	100	0.985876	0.0455177	1	2	5
		chr27:5303101-5303200	chr27	5303101	5303200	100	1.0154	0.0348603	1	8	14
		chr28:2019501-2019600	chr28	2019501	2019600	100	1.38021	0.0158227	1	1	9
		chr28:2093001-2093100	chr28	2093001	2093100	100	-1.92054	0.0251608	1	6	17
		chr28:2093101-2093200	chr28	2093101	2093200	100	-2.27564	0.00821148	1	4	5
		chr28:2787801-2787900	chr28	2787801	2787900	100	0.762359	0.048966	1	10	12
		chr28:2929201-2929300	chr28	2929201	2929300	100	1.52747	0.0153614	1	4	8
		chr28:3263201-3263300	chr28	3263201	3263300	100	3.50924	2.33311e-06	0.0163785	7	12
		chr28:3263301-3263400	chr28	3263301	3263400	100	3.50924	2.33311e-06	0.0163785	7	12
		chr28:3263401-3263500	chr28	3263401	3263500	100	2.02114	0.000640231	1	5	10
		chr28:3586201-3586300	chr28	3586201	3586300	100	-0.971847	0.0445427	1	0	6
		chr28:4643601-4643700	chr28	4643601	4643700	100	1.02551	0.0330396	1	2	8
		chrW:4067101-4067200	chrW	4067101	4067200	100	-0.965929	0.0385391	1	2	6
		chrW:4067201-4067300	chrW	4067201	4067300	100	-0.965929	0.0385391	1	5	8
		chrW:4067301-4067400	chrW	4067301	4067400	100	-0.965929	0.0385391	1	1	4
		chrW:4067401-4067500	chrW	4067401	4067500	100	-0.965929	0.0385391	1	1	7
		chrZ:7337401-7337500	chrZ	7337401	7337500	100	1.32164	0.005151	1	2	6
		chrZ:10710101-10710200	chrZ	10710101	10710200	100	0.866143	0.0329088	1	0	7
		chrZ:25392801-25392900	chrZ	25392801	25392900	100	1.03588	0.023746	1	16	17
		chrZ:25392901-25393000	chrZ	25392901	25393000	100	1.03588	0.023746	1	8	14
		chrZ:31639501-31639600	chrZ	31639501	31639600	100	-1.11806	0.0295733	1	3	14
		chrZ:34995801-34995900	chrZ	34995801	34995900	100	1.07283	0.0234949	1	1	7
		chrZ:34995901-34996000	chrZ	34995901	34996000	100	1.02559	0.0444037	1	4	8
		chrZ:65334601-65334700	chrZ	65334601	65334700	100	0.689033	0.0464672	1	7	13
		chrZ:65334701-65334800	chrZ	65334701	65334800	100	0.689033	0.0464672	1	3	13
		chrZ:65431301-65431400	chrZ	65431301	65431400	100	0.985375	0.0412842	1	11	17
		chrZ:66132501-66132600	chrZ	66132501	66132600	100	1.09912	0.00916698	1	6	15
		chrZ:66146901-66147000	chrZ	66146901	66147000	100	0.866159	0.0444674	1	7	18
		chrZ:74098701-74098800	chrZ	74098701	74098800	100	1.10509	0.0182697	1	3	13
		chrZ:74098801-74098900	chrZ	74098801	74098900	100	1.15218	0.0192189	1	2	9
		chrZ:74098901-74099000	chrZ	74098901	74099000	100	1.1209	0.0269341	1	3	13
		chrZ:76622001-76622100	chrZ	76622001	76622100	100	0.882767	0.0248127	1	3	7
		chrZ:77477701-77477800	chrZ	77477701	77477800	100	0.945768	0.0253626	1	1	12
	ROI	chr1:429838-430252	chr1	429838	430252	415	0.919423	0.0199768	1	30	60
		chr1:40853300-40853856	chr1	40853300	40853856	557	0.883189	0.0358758	1	4	54
		chr1:49533575-49533683	chr1	49533575	49533683	109	-1.57188	0.0156306	1	3	11
		chr1:51015827-51016018	chr1	51015827	51016018	192	-2.55058	0.0298218	1	3	10
		chr1:61077945-61078198	chr1	61077945	61078198	254	2.92249	0.00123361	0.891373	16	31
		chr1:164901437-164901778	chr1	164901437	164901778	342	1.8281	0.0117011	1	2	32
		chr1:187130126-187130409	chr1	187130126	187130409	284	-0.656998	0.0219248	1	8	16
		chr1:194436133-194436237	chr1	194436133	194436237	105	-0.855491	0.0242472	1	10	10
		chr1:194651175-194651438	chr1	194651175	194651438	264	1.23014	0.0084101	1	8	26
		chr1:195730788-195731950	chr1	195730788	195731950	1163	0.924473	0.0370433	1	12	89
		chr2:189007-189224	chr2	189007	189224	218	1.42508	0.00232067	1	11	22
		chr2:256975-257649	chr2	256975	257649	675	0.835618	0.0330756	1	25	74
		chr2:113381948-113382367	chr2	113381948	113382367	420	-0.94471	0.021777	1	17	50
		chr3:25898088-25898529	chr3	25898088	25898529	442	-1.06191	0.0201718	1	35	48
		chr3:30327385-30327986	chr3	30327385	30327986	602	0.971297	0.00951423	1	13	68
		chr3:45667157-45668127	chr3	45667157	45668127	971	1.17298	0.048305	1	6	65
		chr3:48290884-48291337	chr3	48290884	48291337	454	-0.954997	0.0489946	1	61	74
		chr3:97197231-97197434	chr3	97197231	97197434	204	1.88161	0.0330659	1	4	15
		chr4:740034-740180	chr4	740034	740180	147	1.47415	0.00435779	1	1	14
		chr4:884551-884663	chr4	884551	884663	113	1.42277	0.00569152	1	1	8
		chr4:1212081-1212352	chr4	1212081	1212352	272	-1.25996	0.00314736	1	6	26
		chr4:2540549-2540943	chr4	2540549	2540943	395	0.729121	0.049477	1	10	41
		chr4:4253261-4253516	chr4	4253261	4253516	256	1.16554	0.00541894	1	12	22
		chr4:14214812-14215074	chr4	14214812	14215074	263	1.15264	0.0304896	1	8	23
		chr4:85246930-85247063	chr4	85246930	85247063	134	1.53958	0.0033561	1	0	13
		chr5:390143-390360	chr5	390143	390360	218	1.53782	0.00826314	1	12	31
		chr5:5684361-5684877	chr5	5684361	5684877	517	0.555868	0.0114534	1	33	81
		chr5:16888284-16888371	chr5	16888284	16888371	88	-0.972682	0.04889	1	4	11
		chr5:38198271-38198563	chr5	38198271	38198563	293	1.04697	0.043796	1	8	28
		chr5:39036080-39036268	chr5	39036080	39036268	189	1.15799	0.038072	1	10	19
		chr6:510975-511295	chr6	510975	511295	321	-1.03109	0.0108198	1	14	44
		chr6:8082216-8082556	chr6	8082216	8082556	341	-0.85549	0.0442258	1	11	30
		chr6:11562193-11562581	chr6	11562193	11562581	389	0.73978	0.0477924	1	23	51
		chr6:14916140-14916414	chr6	14916140	14916414	275	-1.60034	0.0202781	1	7	18
		chr6:16960645-16961398	chr6	16960645	16961398	754	1.01129	0.0160789	1	9	68
		chr6:17299560-17299780	chr6	17299560	17299780	221	1.99876	0.000692848	0.584071	4	21
		chr6:22336990-22337936	chr6	22336990	22337936	947	0.973245	0.0398196	1	9	92
		chr6:32149528-32149879	chr6	32149528	32149879	352	0.695761	0.0437764	1	4	34
		chr6:32172399-32172575	chr6	32172399	32172575	177	-1.17641	0.025841	1	3	13
		chr6:34188928-34189035	chr6	34188928	34189035	108	-1.49294	0.0430117	1	0	6
		chr6:34879954-34880276	chr6	34879954	34880276	323	-0.747591	0.0280947	1	18	43
		chr6:34953727-34954162	chr6	34953727	34954162	436	1.34313	0.0275225	1	11	46
		chr7:10606294-10606528	chr7	10606294	10606528	235	1.17306	0.0320655	1	6	24
		chr7:22331270-22331774	chr7	22331270	22331774	505	-0.894699	0.0390343	1	28	54
		chr7:26399734-26400133	chr7	26399734	26400133	400	1.09241	0.023819	1	4	19
		chr7:36453022-36453243	chr7	36453022	36453243	222	1.24022	0.0117458	1	3	18
		chr8:5191540-5191738	chr8	5191540	5191738	199	1.80182	0.00209819	1	18	32
		chr8:24334849-24335412	chr8	24334849	24335412	564	0.942101	0.00816566	1	54	83
		chr8:28562845-28563315	chr8	28562845	28563315	471	1.13313	0.0206562	1	47	64
		chr9:2329146-2329455	chr9	2329146	2329455	310	1.1609	0.0152776	1	13	47
		chr9:3693375-3694655	chr9	3693375	3694655	1281	1.43442	0.000476074	0.584071	44	115
		chr9:13926101-13926940	chr9	13926101	13926940	840	1.22644	0.0169747	1	24	81
		chr9:14971770-14972007	chr9	14971770	14972007	238	0.774332	0.0404549	1	5	24
		chr9:22935903-22936223	chr9	22935903	22936223	321	0.916903	0.0224017	1	12	28
		chr9:23537757-23538399	chr9	23537757	23538399	643	1.46709	0.00703869	1	9	67
		chr9:23827974-23828318	chr9	23827974	23828318	345	1.20243	0.0172289	1	19	39
		chr10:11429166-11429566	chr10	11429166	11429566	401	1.1654	0.00909323	1	4	40
		chr10:20224208-20224837	chr10	20224208	20224837	630	0.901712	0.0427786	1	5	73
		chr11:458046-458502	chr11	458046	458502	457	1.01953	0.0105447	1	8	40
		chr11:842121-842223	chr11	842121	842223	103	-1.39196	0.0414214	1	4	10
		chr11:1715302-1715998	chr11	1715302	1715998	697	1.45396	0.00247434	1	9	49
		chr11:1898475-1899205	chr11	1898475	1899205	731	0.88826	0.0436299	1	13	76
		chr11:2046610-2046795	chr11	2046610	2046795	186	1.22732	0.00610944	1	6	15
		chr11:6861583-6862211	chr11	6861583	6862211	629	0.937119	0.0426481	1	14	53
		chr11:8478658-8479256	chr11	8478658	8479256	599	0.76377	0.0446077	1	49	73
		chr11:18873158-18873566	chr11	18873158	18873566	409	1.46961	0.0103402	1	19	49
		chr11:19283285-19283604	chr11	19283285	19283604	320	-0.744298	0.0197574	1	48	48
		chr12:2017716-2018261	chr12	2017716	2018261	546	-0.568836	0.0413327	1	8	51
		chr12:2700294-2700543	chr12	2700294	2700543	250	-1.1214	0.000630473	0.584071	11	34
		chr12:2904246-2904604	chr12	2904246	2904604	359	-0.867739	0.0114991	1	13	50
		chr12:11592837-11593728	chr12	11592837	11593728	892	0.963801	0.013378	1	62	123
		chr12:11624392-11624661	chr12	11624392	11624661	270	1.03841	0.0294063	1	14	30
		chr12:16285799-16286230	chr12	16285799	16286230	432	1.3957	0.00499489	1	7	43
		chr12:16346114-16346507	chr12	16346114	16346507	394	1.02167	0.0289421	1	11	37
		chr12:16763013-16763444	chr12	16763013	16763444	432	1.38846	0.00326746	1	16	46
		chr13:8270134-8270880	chr13	8270134	8270880	747	1.42024	0.00742086	1	7	63
		chr13:11311258-11312053	chr13	11311258	11312053	796	1.04568	0.0336908	1	24	66
		chr13:17011516-17011695	chr13	17011516	17011695	180	-1.29542	0.0168892	1	27	23
		chr13:17625434-17625573	chr13	17625434	17625573	140	1.2333	0.0375579	1	6	17
		chr13:18395361-18395963	chr13	18395361	18395963	603	1.20695	0.00643162	1	11	46
		chr14:3210578-3211245	chr14	3210578	3211245	668	0.971838	0.0470666	1	32	71
		chr14:3957306-3957621	chr14	3957306	3957621	316	1.05669	0.0397958	1	8	24
		chr14:4049808-4050265	chr14	4049808	4050265	458	-1.12519	0.0486255	1	12	38
		chr14:4052347-4052884	chr14	4052347	4052884	538	1.33102	0.0188155	1	15	48
		chr14:4134485-4134909	chr14	4134485	4134909	425	1.25326	0.00209327	1	45	59
		chr14:6911376-6911918	chr14	6911376	6911918	543	0.965231	0.0103621	1	30	65
		chr14:12719526-12720003	chr14	12719526	12720003	478	0.965374	0.0487336	1	2	40
		chr14:12779202-12779596	chr14	12779202	12779596	395	0.702717	0.035844	1	9	31
		chr14:13126570-13126900	chr14	13126570	13126900	331	1.44478	0.00622896	1	11	35
		chr14:13336940-13337910	chr14	13336940	13337910	971	1.23112	0.0131131	1	32	90
		chr15:1593972-1594477	chr15	1593972	1594477	506	0.882409	0.0236394	1	20	49
		chr15:4610711-4611027	chr15	4610711	4611027	317	1.47839	0.0072635	1	4	19
		chr15:4702713-4703685	chr15	4702713	4703685	973	1.21795	0.0297412	1	36	102
		chr15:7220703-7221225	chr15	7220703	7221225	523	1.30485	0.0393662	1	15	60
		chr15:8003051-8004572	chr15	8003051	8004572	1522	0.666127	0.046465	1	28	127
		chr15:11350249-11350403	chr15	11350249	11350403	155	-1.37937	0.0276271	1	12	10
		chr17:3920644-3921005	chr17	3920644	3921005	362	1.24689	0.0367278	1	2	25
		chr17:6506047-6506218	chr17	6506047	6506218	172	-1.13616	0.0309298	1	11	20
		chr17:9251101-9251316	chr17	9251101	9251316	216	1.22064	0.025959	1	4	24
		chr18:2038682-2038864	chr18	2038682	2038864	183	0.971495	0.0454804	1	2	14
		chr18:2153237-2153456	chr18	2153237	2153456	220	1.59026	0.00543092	1	5	25
		chr18:8049206-8049358	chr18	8049206	8049358	153	1.12248	0.0426317	1	6	20
		chr18:9839719-9840442	chr18	9839719	9840442	724	1.2873	0.00633935	1	32	78
		chr18:10291116-10291837	chr18	10291116	10291837	722	1.61297	0.00153559	0.970877	41	76
		chr18:10921934-10922219	chr18	10921934	10922219	286	1.03584	0.0455567	1	5	28
		chr19:4087763-4087853	chr19	4087763	4087853	91	-1.10717	0.0450195	1	2	7
		chr19:5385493-5386041	chr19	5385493	5386041	549	-1.06958	0.0298332	1	17	38
		chr19:5731197-5731731	chr19	5731197	5731731	535	-0.940666	0.00719736	1	18	49
		chr19:5949410-5949829	chr19	5949410	5949829	420	0.984773	0.0336963	1	31	54
		chr19:7271087-7271555	chr19	7271087	7271555	469	1.51248	0.0182258	1	18	49
		chr19:7346213-7346509	chr19	7346213	7346509	297	1.54675	0.00911562	1	3	33
		chr19:9618114-9618307	chr19	9618114	9618307	194	0.93079	0.0320606	1	2	21
		chr20:875736-875953	chr20	875736	875953	218	-1.21195	0.03815	1	0	19
		chr20:4972881-4973268	chr20	4972881	4973268	388	0.983333	0.0392471	1	5	46
		chr20:10885051-10886486	chr20	10885051	10886486	1436	0.96293	0.0127558	1	36	156
		chr21:3023209-3023616	chr21	3023209	3023616	408	1.0622	0.0260966	1	9	41
		chr21:3449100-3449393	chr21	3449100	3449393	294	1.27084	0.0147902	1	7	19
		chr21:4843635-4843923	chr21	4843635	4843923	289	-1.22292	0.0154118	1	9	18
		chr21:5208211-5208369	chr21	5208211	5208369	159	-1.47517	0.00715129	1	5	15
		chr22:2585263-2586124	chr22	2585263	2586124	862	1.20085	0.00987631	1	15	74
		chr22:4617268-4617951	chr22	4617268	4617951	684	0.754698	0.0462757	1	43	60
		chr23:1685578-1685875	chr23	1685578	1685875	298	-1.20901	0.0162426	1	4	31
		chr23:2800415-2800754	chr23	2800415	2800754	340	-1.22655	0.0135724	1	6	41
		chr23:4825043-4825507	chr23	4825043	4825507	465	1.06816	0.0265049	1	7	42
		chr23:5065417-5065771	chr23	5065417	5065771	355	0.84637	0.0226614	1	18	47
		chr24:1785530-1786037	chr24	1785530	1786037	508	1.6383	0.00813345	1	5	49
		chr24:4322431-4322801	chr24	4322431	4322801	371	-1.07764	0.0366652	1	3	31
		chr24:5677574-5678402	chr24	5677574	5678402	829	1.0282	0.0400108	1	30	90
		chr25:2640726-2640866	chr25	2640726	2640866	141	1.20083	0.0386079	1	17	22
		chr26:3262317-3263255	chr26	3262317	3263255	939	1.64827	5.90644e-05	0.149374	30	87
		chr26:3503866-3504012	chr26	3503866	3504012	147	-1.20573	0.0108944	1	14	23
		chr27:1677850-1678721	chr27	1677850	1678721	872	1.18251	0.00540207	1	58	85
		chr27:3448809-3448885	chr27	3448809	3448885	77	-1.18643	0.0479635	1	4	8
		chr27:4235683-4235757	chr27	4235683	4235757	75	-1.01306	0.035908	1	6	9
		chr27:4333187-4333566	chr27	4333187	4333566	380	1.0504	0.0470723	1	13	35
		chr27:5419646-5419925	chr27	5419646	5419925	280	-0.936621	0.0455604	1	8	36
		chr28:368192-369189	chr28	368192	369189	998	1.26486	0.0139268	1	29	79
		chr28:2019440-2020189	chr28	2019440	2020189	750	0.929411	0.021436	1	56	95
		chr28:2093083-2093153	chr28	2093083	2093153	71	-2.38368	0.0384811	1	3	6
		chr28:2787355-2788097	chr28	2787355	2788097	743	0.644929	0.0296894	1	42	78
		chr28:2929088-2929337	chr28	2929088	2929337	250	1.43997	0.0177751	1	10	18
		chr28:3263299-3263412	chr28	3263299	3263412	114	3.42667	3.39683e-06	0.0171812	9	15
		chrZ:7337093-7337617	chrZ	7337093	7337617	525	1.47372	0.00047576	0.584071	6	47
		chrZ:9097672-9097770	chrZ	9097672	9097770	99	-1.08823	0.0464303	1	0	9
		chrZ:25392776-25392950	chrZ	25392776	25392950	175	0.936145	0.0336963	1	26	28
		chrZ:34995709-34996201	chrZ	34995709	34996201	493	0.889811	0.042786	1	13	46
		chrZ:48033896-48034046	chrZ	48033896	48034046	151	-1.19561	0.0371424	1	5	15
		chrZ:54997865-54998775	chrZ	54997865	54998775	911	1.31629	0.0112624	1	4	50
		chrZ:66132336-66132809	chrZ	66132336	66132809	474	0.995574	0.0231527	1	28	54
		chrZ:66146973-66147169	chrZ	66146973	66147169	197	0.932023	0.0400409	1	15	21
		chrZ:74098691-74098994	chrZ	74098691	74098994	304	1.00238	0.0340504	1	9	35
		chrZ:74371029-74371333	chrZ	74371029	74371333	305	-0.886726	0.0437476	1	11	26
		chrZ:80580655-80581146	chrZ	80580655	80581146	492	-0.813313	0.0491213	1	12	38
		chrW:4067175-4067369	chrW	4067175	4067369	195	-1.06631	0.0166813	1	6	12
SW	ADJW	chr1:439501-439600	chr1	439501	439600	100	-3.90099	0.0169734	1	3	7
		chr1:439601-439700	chr1	439601	439700	100	-3.90099	0.0169742	1	9	13
		chr1:1915801-1915900	chr1	1915801	1915900	100	-3.76139	0.00943903	1	3	15
		chr1:1915901-1916000	chr1	1915901	1916000	100	-3.7614	0.00944203	1	3	7
		chr1:1916001-1916100	chr1	1916001	1916100	100	-3.7614	0.0094432	1	7	11
		chr1:1916101-1916200	chr1	1916101	1916200	100	-3.76139	0.00943859	1	4	11
		chr1:7534001-7534100	chr1	7534001	7534100	100	2.49647	0.011852	1	0	5
		chr1:7534101-7534200	chr1	7534101	7534200	100	2.49644	0.0118456	1	2	5
		chr1:7534201-7534300	chr1	7534201	7534300	100	2.49641	0.0118392	1	1	5
		chr1:7534301-7534400	chr1	7534301	7534400	100	2.49637	0.0118308	1	0	7
		chr1:38251601-38251700	chr1	38251601	38251700	100	-3.75973	0.017893	1	3	4
		chr1:38251701-38251800	chr1	38251701	38251800	100	-3.75973	0.0178931	1	4	13
		chr1:38251801-38251900	chr1	38251801	38251900	100	-3.75973	0.0178932	1	2	12
		chr1:49510401-49510500	chr1	49510401	49510500	100	3.66647	0.0477181	1	3	10
		chr1:49510501-49510600	chr1	49510501	49510600	100	3.66647	0.0477073	1	2	6
		chr1:60940101-60940200	chr1	60940101	60940200	100	-3.83228	0.00948823	1	1	9
		chr1:60940201-60940300	chr1	60940201	60940300	100	-3.83228	0.00948902	1	0	7
		chr1:60940301-60940400	chr1	60940301	60940400	100	-3.83228	0.00948752	1	6	8
		chr1:80299301-80299400	chr1	80299301	80299400	100	3.61496	0.0190891	1	3	10
		chr1:80299401-80299500	chr1	80299401	80299500	100	3.61496	0.0190854	1	6	6
		chr1:80299501-80299600	chr1	80299501	80299600	100	3.74286	0.0068283	1	5	16
		chr1:88556601-88556700	chr1	88556601	88556700	100	-4.00504	0.040062	1	2	13
		chr1:88556701-88556800	chr1	88556701	88556800	100	-4.00504	0.0400626	1	1	11
		chr1:89539201-89539300	chr1	89539201	89539300	100	-1.04684	0.00813766	1	2	12
		chr1:101057101-101057200	chr1	101057101	101057200	100	-0.841388	0.0241825	1	11	14
		chr1:101057201-101057300	chr1	101057201	101057300	100	-0.841388	0.0241827	1	9	11
		chr1:101057301-101057400	chr1	101057301	101057400	100	-0.841388	0.0241829	1	7	11
		chr1:101057401-101057500	chr1	101057401	101057500	100	-1.20626	0.0448969	1	9	12
		chr1:101061601-101061700	chr1	101061601	101061700	100	-0.339081	0.0355772	1	6	12
		chr1:109020501-109020600	chr1	109020501	109020600	100	-3.93262	0.0194923	1	1	12
		chr1:111371101-111371200	chr1	111371101	111371200	100	1.23429	0.0339949	1	2	13
		chr1:111371201-111371300	chr1	111371201	111371300	100	1.23429	0.0339776	1	6	6
		chr1:111371301-111371400	chr1	111371301	111371400	100	1.17025	0.0412891	1	5	12
		chr1:113367501-113367600	chr1	113367501	113367600	100	-1.18456	0.0454468	1	6	15
		chr1:113367601-113367700	chr1	113367601	113367700	100	-1.18453	0.0454291	1	3	8
		chr1:113367701-113367800	chr1	113367701	113367800	100	-0.933817	0.00846194	1	3	10
		chr1:113994101-113994200	chr1	113994101	113994200	100	0.760898	0.0429834	1	1	3
		chr1:113994201-113994300	chr1	113994201	113994300	100	0.787679	0.0426727	1	6	14
		chr1:113994301-113994400	chr1	113994301	113994400	100	0.787681	0.0426682	1	6	13
		chr1:114235901-114236000	chr1	114235901	114236000	100	1.44636	0.015641	1	3	12
		chr1:114236001-114236100	chr1	114236001	114236100	100	1.44636	0.015631	1	5	12
		chr1:114255801-114255900	chr1	114255801	114255900	100	1.38018	0.0177543	1	5	14
		chr1:114255901-114256000	chr1	114255901	114256000	100	1.38018	0.0177548	1	3	11
		chr1:115840401-115840500	chr1	115840401	115840500	100	0.784493	0.0296632	1	2	13
		chr1:115840501-115840600	chr1	115840501	115840600	100	0.784493	0.0296617	1	3	9
		chr1:115840601-115840700	chr1	115840601	115840700	100	0.784494	0.0296589	1	2	7
		chr1:116003101-116003200	chr1	116003101	116003200	100	2.22015	0.00610632	1	5	13
		chr1:116003201-116003300	chr1	116003201	116003300	100	2.22015	0.00610291	1	2	12
		chr1:116844901-116845000	chr1	116844901	116845000	100	3.91994	0.0155535	1	2	11
		chr1:116845001-116845100	chr1	116845001	116845100	100	3.91994	0.0155548	1	4	14
		chr1:123002001-123002100	chr1	123002001	123002100	100	-1.32477	0.0401281	1	4	14
		chr1:123002101-123002200	chr1	123002101	123002200	100	-1.32479	0.040099	1	3	11
		chr1:124398801-124398900	chr1	124398801	124398900	100	-2.58533	0.0282709	1	1	8
		chr1:124398901-124399000	chr1	124398901	124399000	100	-2.58533	0.0282654	1	2	11
		chr1:125376101-125376200	chr1	125376101	125376200	100	-3.92847	0.0166159	1	0	11
		chr1:125376201-125376300	chr1	125376201	125376300	100	-3.92848	0.0166207	1	6	16
		chr1:125376301-125376400	chr1	125376301	125376400	100	-3.92848	0.0166277	1	2	11
		chr1:125376401-125376500	chr1	125376401	125376500	100	-3.92849	0.0166318	1	4	10
		chr1:133698201-133698300	chr1	133698201	133698300	100	-2.49713	0.0491241	1	2	7
		chr1:133698301-133698400	chr1	133698301	133698400	100	-2.49715	0.0491122	1	4	8
		chr1:133698401-133698500	chr1	133698401	133698500	100	-2.10352	0.0438011	1	2	10
		chr1:176641501-176641600	chr1	176641501	176641600	100	-3.76641	0.00766441	1	3	11
		chr1:176641601-176641700	chr1	176641601	176641700	100	-3.7664	0.00765594	1	2	9
		chr1:193989001-193989100	chr1	193989001	193989100	100	3.55095	0.0447586	1	0	8
		chr1:193989101-193989200	chr1	193989101	193989200	100	3.55095	0.0447539	1	0	6
		chr1:193989201-193989300	chr1	193989201	193989300	100	3.55095	0.0447492	1	0	2
		chr1:193989301-193989400	chr1	193989301	193989400	100	3.55094	0.0447465	1	1	3
		chr1:194380001-194380100	chr1	194380001	194380100	100	-2.85376	0.00638011	1	6	14
		chr1:194380101-194380200	chr1	194380101	194380200	100	-2.60131	0.00337806	1	5	9
		chr1:195626801-195626900	chr1	195626801	195626900	100	2.73694	0.0378654	1	1	9
		chr1:195626901-195627000	chr1	195626901	195627000	100	2.73695	0.037857	1	2	11
		chr1:195627001-195627100	chr1	195627001	195627100	100	2.73696	0.0378459	1	2	4
		chr1:195627101-195627200	chr1	195627101	195627200	100	2.73698	0.0378241	1	3	5
		chr2:6201-6300	chr2	6201	6300	100	-1.05129	0.042495	1	3	13
		chr2:6301-6400	chr2	6301	6400	100	-1.05128	0.0424886	1	1	13
		chr2:6401-6500	chr2	6401	6500	100	-1.05129	0.0424968	1	1	11
		chr2:6501-6600	chr2	6501	6600	100	-1.05126	0.0424806	1	1	12
		chr2:348401-348500	chr2	348401	348500	100	1.89866	0.046365	1	12	17
		chr2:4017301-4017400	chr2	4017301	4017400	100	-1.47875	0.0228642	1	9	13
		chr2:4017401-4017500	chr2	4017401	4017500	100	-1.47876	0.0228562	1	6	11
		chr2:4017501-4017600	chr2	4017501	4017600	100	-1.47876	0.0228535	1	9	16
		chr2:65012501-65012600	chr2	65012501	65012600	100	-3.18169	0.0325998	1	0	10
		chr2:66704101-66704200	chr2	66704101	66704200	100	5.40792	0.00986911	1	1	4
		chr2:66704201-66704300	chr2	66704201	66704300	100	5.40792	0.00986606	1	3	3
		chr2:66704301-66704400	chr2	66704301	66704400	100	5.40792	0.00986302	1	1	5
		chr2:66704401-66704500	chr2	66704401	66704500	100	4.95757	0.0238352	1	0	3
		chr2:89354301-89354400	chr2	89354301	89354400	100	3.99221	0.0202565	1	2	8
		chr2:129235401-129235500	chr2	129235401	129235500	100	-2.30758	0.0195796	1	3	7
		chr3:4365901-4366000	chr3	4365901	4366000	100	-2.96544	0.0337377	1	6	14
		chr3:4366001-4366100	chr3	4366001	4366100	100	-2.96544	0.0337371	1	8	11
		chr3:4366101-4366200	chr3	4366101	4366200	100	-2.96544	0.0337365	1	7	17
		chr3:4412901-4413000	chr3	4412901	4413000	100	-2.4761	0.0248839	1	2	10
		chr3:4413001-4413100	chr3	4413001	4413100	100	-2.47614	0.0248647	1	10	13
		chr3:4413101-4413200	chr3	4413101	4413200	100	-2.47614	0.0248679	1	6	12
		chr3:4453201-4453300	chr3	4453201	4453300	100	-2.11701	0.0382285	1	8	14
		chr3:13862001-13862100	chr3	13862001	13862100	100	-3.66751	0.0204685	1	2	5
		chr3:13862101-13862200	chr3	13862101	13862200	100	-3.66752	0.0204558	1	4	10
		chr3:13862201-13862300	chr3	13862201	13862300	100	-3.66751	0.0204641	1	2	13
		chr3:21701701-21701800	chr3	21701701	21701800	100	4.16987	0.00869564	1	3	7
		chr3:21701801-21701900	chr3	21701801	21701900	100	4.16987	0.00869683	1	3	10
		chr3:30316201-30316300	chr3	30316201	30316300	100	4.53751	0.035291	1	2	8
		chr3:30316301-30316400	chr3	30316301	30316400	100	4.53751	0.0352762	1	4	16
		chr3:30316401-30316500	chr3	30316401	30316500	100	4.53751	0.035258	1	1	10
		chr3:75827501-75827600	chr3	75827501	75827600	100	-3.74286	0.037402	1	1	7
		chr3:75827601-75827700	chr3	75827601	75827700	100	-3.74286	0.0374039	1	6	10
		chr3:104973801-104973900	chr3	104973801	104973900	100	-2.05474	0.0430114	1	11	16
		chr3:104973901-104974000	chr3	104973901	104974000	100	-2.36981	0.046871	1	11	8
		chr3:105015501-105015600	chr3	105015501	105015600	100	-3.7868	0.0115426	1	6	12
		chr4:642801-642900	chr4	642801	642900	100	-3.72748	0.022212	1	1	6
		chr4:642901-643000	chr4	642901	643000	100	-3.72748	0.0222167	1	9	14
		chr4:1665401-1665500	chr4	1665401	1665500	100	-3.88126	0.0103431	1	1	11
		chr4:1665501-1665600	chr4	1665501	1665600	100	-3.88125	0.0103465	1	0	9
		chr4:1665601-1665700	chr4	1665601	1665700	100	-3.88124	0.0103479	1	3	8
		chr4:1720701-1720800	chr4	1720701	1720800	100	-2.17237	0.0384544	1	1	11
		chr4:1720801-1720900	chr4	1720801	1720900	100	-2.17237	0.0384436	1	7	9
		chr4:1761701-1761800	chr4	1761701	1761800	100	-4.04851	0.0125303	1	3	12
		chr4:1761801-1761900	chr4	1761801	1761900	100	-4.04851	0.0125199	1	4	9
		chr4:1761901-1762000	chr4	1761901	1762000	100	-4.04851	0.0125155	1	2	10
		chr4:18804701-18804800	chr4	18804701	18804800	100	-3.7363	0.0081012	1	9	15
		chr4:18804801-18804900	chr4	18804801	18804900	100	-3.7363	0.00809999	1	8	12
		chr4:38202401-38202500	chr4	38202401	38202500	100	3.62438	0.0407252	1	2	5
		chr4:38202501-38202600	chr4	38202501	38202600	100	3.62438	0.0407366	1	3	13
		chr4:38202601-38202700	chr4	38202601	38202700	100	3.62438	0.0407398	1	1	5
		chr5:608901-609000	chr5	608901	609000	100	3.77188	0.028146	1	2	10
		chr5:609001-609100	chr5	609001	609100	100	3.77188	0.0281483	1	4	9
		chr5:609101-609200	chr5	609101	609200	100	3.77188	0.0281465	1	4	12
		chr5:5717601-5717700	chr5	5717601	5717700	100	3.88876	0.00270069	1	2	15
		chr5:5747601-5747700	chr5	5747601	5747700	100	-0.764525	0.0332364	1	1	12
		chr5:7081101-7081200	chr5	7081101	7081200	100	0.921586	0.0258813	1	7	21
		chr5:7081201-7081300	chr5	7081201	7081300	100	0.921586	0.0258816	1	8	19
		chr5:7081301-7081400	chr5	7081301	7081400	100	0.921586	0.0258817	1	5	15
		chr5:7081401-7081500	chr5	7081401	7081500	100	0.921586	0.0258819	1	8	9
		chr5:16883501-16883600	chr5	16883501	16883600	100	1.09156	0.0295025	1	3	12
		chr5:48281801-48281900	chr5	48281801	48281900	100	4.5946	0.0298117	1	12	20
		chr5:48281901-48282000	chr5	48281901	48282000	100	4.5946	0.0298002	1	5	9
		chr5:48282001-48282100	chr5	48282001	48282100	100	4.5946	0.0297967	1	7	9
		chr5:57020201-57020300	chr5	57020201	57020300	100	-0.823559	0.044778	1	2	10
		chr5:57020301-57020400	chr5	57020301	57020400	100	-0.823559	0.044778	1	6	12
		chr5:58097501-58097600	chr5	58097501	58097600	100	-3.79908	0.018022	1	0	6
		chr5:58097601-58097700	chr5	58097601	58097700	100	-3.79908	0.0180211	1	6	14
		chr5:58121501-58121600	chr5	58121501	58121600	100	-3.83637	0.00975969	1	5	9
		chr5:58121601-58121700	chr5	58121601	58121700	100	-3.83637	0.00976089	1	6	10
		chr5:58587801-58587900	chr5	58587801	58587900	100	-3.95805	0.0227872	1	3	7
		chr5:58587901-58588000	chr5	58587901	58588000	100	-3.95805	0.0227846	1	3	7
		chr5:58588001-58588100	chr5	58588001	58588100	100	-4.16416	0.00391676	1	3	4
		chr6:22126801-22126900	chr6	22126801	22126900	100	-3.08928	0.025497	1	4	17
		chr6:22126901-22127000	chr6	22126901	22127000	100	-3.08928	0.0254965	1	4	12
		chr6:22212501-22212600	chr6	22212501	22212600	100	3.67025	0.0362111	1	2	13
		chr6:25957201-25957300	chr6	25957201	25957300	100	-2.31751	0.017027	1	1	7
		chr6:25957301-25957400	chr6	25957301	25957400	100	-2.31751	0.0170229	1	1	6
		chr6:25957401-25957500	chr6	25957401	25957500	100	-2.3175	0.0170189	1	0	3
		chr6:25957501-25957600	chr6	25957501	25957600	100	-2.31753	0.0170322	1	4	4
		chr6:35036601-35036700	chr6	35036601	35036700	100	3.84758	0.0456244	1	2	6
		chr7:93201-93300	chr7	93201	93300	100	-3.38424	0.00429264	1	2	8
		chr7:93301-93400	chr7	93301	93400	100	-2.98112	0.0439749	1	1	5
		chr7:93401-93500	chr7	93401	93500	100	-2.98111	0.043967	1	1	6
		chr7:28564101-28564200	chr7	28564101	28564200	100	-2.45328	0.021933	1	5	9
		chr7:33820201-33820300	chr7	33820201	33820300	100	-4.68691	0.00678283	1	3	12
		chr7:33820301-33820400	chr7	33820301	33820400	100	-4.6066	0.0159775	1	1	4
		chr7:33820401-33820500	chr7	33820401	33820500	100	-4.6066	0.0159688	1	1	9
		chr8:3875801-3875900	chr8	3875801	3875900	100	-3.93196	0.00780108	1	4	9
		chr8:5241201-5241300	chr8	5241201	5241300	100	2.77631	0.0443375	1	2	11
		chr8:7830301-7830400	chr8	7830301	7830400	100	-3.09534	0.00824444	1	3	12
		chr8:8810501-8810600	chr8	8810501	8810600	100	0.920822	0.0160852	1	2	11
		chr8:9011101-9011200	chr8	9011101	9011200	100	2.48631	0.00166243	1	1	11
		chr8:9011201-9011300	chr8	9011201	9011300	100	2.87277	0.00473803	1	2	9
		chr8:20119001-20119100	chr8	20119001	20119100	100	-3.41403	0.0198369	1	3	7
		chr8:20119101-20119200	chr8	20119101	20119200	100	-3.41403	0.0198279	1	3	10
		chr8:20119201-20119300	chr8	20119201	20119300	100	-4.43027	0.0067911	1	0	5
		chr8:20119301-20119400	chr8	20119301	20119400	100	-4.43027	0.00679158	1	1	6
		chr8:21493701-21493800	chr8	21493701	21493800	100	-3.67818	0.0251939	1	4	6
		chr8:21493801-21493900	chr8	21493801	21493900	100	-3.67817	0.0252002	1	0	6
		chr8:24082901-24083000	chr8	24082901	24083000	100	-3.78876	0.00887975	1	2	14
		chr9:653501-653600	chr9	653501	653600	100	-3.71203	0.0413353	1	0	4
		chr9:653601-653700	chr9	653601	653700	100	-3.71203	0.0413326	1	1	8
		chr9:653701-653800	chr9	653701	653800	100	-3.71203	0.0413351	1	1	6
		chr9:653801-653900	chr9	653801	653900	100	-3.71203	0.0413287	1	0	4
		chr9:653901-654000	chr9	653901	654000	100	-3.71203	0.0413222	1	1	5
		chr9:3400701-3400800	chr9	3400701	3400800	100	-1.98901	0.0149008	1	1	8
		chr9:3400801-3400900	chr9	3400801	3400900	100	-1.98899	0.0148972	1	7	6
		chr9:3400901-3401000	chr9	3400901	3401000	100	-1.98899	0.0148962	1	0	11
		chr9:4820201-4820300	chr9	4820201	4820300	100	2.23176	0.015363	1	15	17
		chr9:4820301-4820400	chr9	4820301	4820400	100	2.23176	0.0153601	1	11	17
		chr9:4820401-4820500	chr9	4820401	4820500	100	2.23175	0.0153492	1	12	20
		chr9:5125901-5126000	chr9	5125901	5126000	100	-2.39551	0.0275406	1	5	10
		chr9:14166201-14166300	chr9	14166201	14166300	100	-2.37613	0.0227021	1	0	7
		chr9:14166301-14166400	chr9	14166301	14166400	100	-2.37612	0.02269	1	2	12
		chr9:14166401-14166500	chr9	14166401	14166500	100	-2.37612	0.0226836	1	1	8
		chr9:14965001-14965100	chr9	14965001	14965100	100	3.57011	0.0490637	1	2	12
		chr9:15909701-15909800	chr9	15909701	15909800	100	-2.71733	0.0398342	1	4	11
		chr9:23457201-23457300	chr9	23457201	23457300	100	-3.82273	0.00661919	1	2	9
		chr9:23457301-23457400	chr9	23457301	23457400	100	-3.52296	0.0328711	1	5	8
		chr9:23457501-23457600	chr9	23457501	23457600	100	-3.85346	0.030054	1	6	13
		chr10:12909701-12909800	chr10	12909701	12909800	100	-3.8731	0.00705664	1	3	8
		chr10:17093801-17093900	chr10	17093801	17093900	100	2.82096	0.00422402	1	2	6
		chr10:17093901-17094000	chr10	17093901	17094000	100	2.82095	0.004223	1	0	5
		chr10:17979801-17979900	chr10	17979801	17979900	100	3.63031	0.0462223	1	4	5
		chr10:19504001-19504100	chr10	19504001	19504100	100	-3.01247	0.0253936	1	4	11
		chr10:20025501-20025600	chr10	20025501	20025600	100	-2.92681	0.0321597	1	4	10
		chr10:20047101-20047200	chr10	20047101	20047200	100	4.26667	0.046119	1	4	14
		chr10:20065901-20066000	chr10	20065901	20066000	100	-2.62855	0.0237664	1	5	11
		chr10:20092201-20092300	chr10	20092201	20092300	100	3.98837	0.00711371	1	2	10
		chr11:391801-391900	chr11	391801	391900	100	-2.83395	0.0465348	1	1	8
		chr11:1006001-1006100	chr11	1006001	1006100	100	-2.19677	0.0225479	1	9	17
		chr11:2742601-2742700	chr11	2742601	2742700	100	-2.5024	0.0373815	1	5	11
		chr11:2742701-2742800	chr11	2742701	2742800	100	-2.5024	0.0373766	1	6	14
		chr11:2772601-2772700	chr11	2772601	2772700	100	-2.09792	0.00396641	1	1	7
		chr11:2772701-2772800	chr11	2772701	2772800	100	-2.09792	0.00396447	1	2	10
		chr11:2772801-2772900	chr11	2772801	2772900	100	-2.09792	0.00396439	1	3	6
		chr11:2772901-2773000	chr11	2772901	2773000	100	-2.09792	0.00396432	1	0	11
		chr11:18117701-18117800	chr11	18117701	18117800	100	-4.31509	0.034877	1	1	9
		chr11:18117801-18117900	chr11	18117801	18117900	100	-4.31509	0.0348618	1	3	10
		chr11:18117901-18118000	chr11	18117901	18118000	100	-4.31509	0.0348513	1	3	11
		chr11:19110301-19110400	chr11	19110301	19110400	100	-2.35577	0.041424	1	5	11
		chr11:19110401-19110500	chr11	19110401	19110500	100	-4.04164	0.0030587	1	5	9
		chr11:19814001-19814100	chr11	19814001	19814100	100	-3.81042	0.0157627	1	7	13
		chr11:19814101-19814200	chr11	19814101	19814200	100	-3.81043	0.0157676	1	1	9
		chr12:1110301-1110400	chr12	1110301	1110400	100	-1.40468	0.0364589	1	4	7
		chr12:1110401-1110500	chr12	1110401	1110500	100	-1.40468	0.0364494	1	4	7
		chr12:1110501-1110600	chr12	1110501	1110600	100	-1.40468	0.0364336	1	4	11
		chr12:1110601-1110700	chr12	1110601	1110700	100	-1.3394	0.0464605	1	5	14
		chr12:1585601-1585700	chr12	1585601	1585700	100	-4.396	0.000515546	0.748676	2	12
		chr12:1585701-1585800	chr12	1585701	1585800	100	-4.396	0.000515528	0.748676	4	9
		chr12:1585801-1585900	chr12	1585801	1585900	100	-4.39601	0.00051551	0.748676	1	4
		chr12:1585901-1586000	chr12	1585901	1586000	100	-3.26212	0.003443	1	2	15
		chr12:2711801-2711900	chr12	2711801	2711900	100	-0.842498	0.0130714	1	11	17
		chr12:2711901-2712000	chr12	2711901	2712000	100	-0.842498	0.0130716	1	8	12
		chr12:3187301-3187400	chr12	3187301	3187400	100	-2.23304	0.0396742	1	8	16
		chr12:8879001-8879100	chr12	8879001	8879100	100	3.80419	0.0119492	1	1	12
		chr12:8879101-8879200	chr12	8879101	8879200	100	3.80419	0.0119505	1	8	12
		chr12:8879201-8879300	chr12	8879201	8879300	100	2.69725	0.0454309	1	8	13
		chr12:9294001-9294100	chr12	9294001	9294100	100	-5.09457	0.000788381	0.880682	1	5
		chr12:9294101-9294200	chr12	9294101	9294200	100	-5.09457	0.000788095	0.880682	0	2
		chr12:9294201-9294300	chr12	9294201	9294300	100	-5.09457	0.000787445	0.880682	0	5
		chr12:11482901-11483000	chr12	11482901	11483000	100	-2.88954	0.042798	1	2	10
		chr12:11483001-11483100	chr12	11483001	11483100	100	-3.90916	0.0140205	1	2	8
		chr12:11484601-11484700	chr12	11484601	11484700	100	-2.7853	0.00921263	1	5	11
		chr12:11484701-11484800	chr12	11484701	11484800	100	-2.50063	0.0452082	1	8	5
		chr12:15547901-15548000	chr12	15547901	15548000	100	-4.21407	0.0295066	1	2	6
		chr12:15548001-15548100	chr12	15548001	15548100	100	-4.21407	0.0295023	1	1	7
		chr12:15548101-15548200	chr12	15548101	15548200	100	-4.21407	0.0294981	1	2	10
		chr12:15548201-15548300	chr12	15548201	15548300	100	-4.21407	0.0294849	1	1	3
		chr13:1062701-1062800	chr13	1062701	1062800	100	-4.04019	0.0134289	1	7	13
		chr13:1662101-1662200	chr13	1662101	1662200	100	3.76648	0.0150366	1	2	9
		chr13:17351401-17351500	chr13	17351401	17351500	100	-3.69466	0.0275195	1	2	13
		chr13:17351801-17351900	chr13	17351801	17351900	100	3.64765	0.0421348	1	8	12
		chr13:17351901-17352000	chr13	17351901	17352000	100	3.64765	0.0421312	1	8	17
		chr13:17352001-17352100	chr13	17352001	17352100	100	3.64765	0.0421412	1	4	4
		chr14:12337201-12337300	chr14	12337201	12337300	100	2.68927	0.0480566	1	10	18
		chr14:12337401-12337500	chr14	12337401	12337500	100	3.23263	0.000192626	0.399615	3	10
		chr14:14038801-14038900	chr14	14038801	14038900	100	-2.71331	0.0304401	1	5	9
		chr14:14262801-14262900	chr14	14262801	14262900	100	-3.81698	0.00605799	1	6	11
		chr14:14262901-14263000	chr14	14262901	14263000	100	-3.81699	0.00605536	1	10	11
		chr14:14263001-14263100	chr14	14263001	14263100	100	-3.81699	0.00605591	1	8	16
		chr15:5486701-5486800	chr15	5486701	5486800	100	2.41962	0.0227731	1	4	8
		chr15:7100101-7100200	chr15	7100101	7100200	100	-2.25712	0.0386207	1	4	14
		chr15:11167001-11167100	chr15	11167001	11167100	100	2.93046	0.00315768	1	7	7
		chr15:11167101-11167200	chr15	11167101	11167200	100	2.93044	0.00315437	1	7	12
		chr15:11167201-11167300	chr15	11167201	11167300	100	2.93042	0.00315169	1	6	10
		chr17:590401-590500	chr17	590401	590500	100	1.74322	0.00471669	1	2	12
		chr17:590501-590600	chr17	590501	590600	100	1.7432	0.00471179	1	3	9
		chr17:590601-590700	chr17	590601	590700	100	1.53894	0.0207624	1	1	11
		chr17:899401-899500	chr17	899401	899500	100	3.52434	0.0487199	1	2	12
		chr17:899501-899600	chr17	899501	899600	100	3.52434	0.0487279	1	1	8
		chr17:899601-899700	chr17	899601	899700	100	3.52434	0.0487359	1	1	6
		chr17:1029101-1029200	chr17	1029101	1029200	100	-3.7552	0.0221775	1	3	11
		chr17:6141701-6141800	chr17	6141701	6141800	100	-3.7127	0.0115796	1	3	12
		chr17:6141801-6141900	chr17	6141801	6141900	100	-3.7127	0.0115776	1	5	14
		chr17:6141901-6142000	chr17	6141901	6142000	100	-3.7127	0.0115756	1	1	7
		chr18:6201-6300	chr18	6201	6300	100	-0.629128	0.0378362	1	6	15
		chr18:5061101-5061200	chr18	5061101	5061200	100	1.98026	0.0232146	1	2	5
		chr18:5061201-5061300	chr18	5061201	5061300	100	1.98023	0.0232065	1	4	8
		chr18:5061301-5061400	chr18	5061301	5061400	100	1.98025	0.0232104	1	3	14
		chr18:9850201-9850300	chr18	9850201	9850300	100	-3.94356	0.0136144	1	3	7
		chr18:9850301-9850400	chr18	9850301	9850400	100	-3.94356	0.0136106	1	1	7
		chr18:9886601-9886700	chr18	9886601	9886700	100	-3.6767	0.0420086	1	7	10
		chr18:9906101-9906200	chr18	9906101	9906200	100	-2.47402	0.039534	1	6	12
		chr18:10291301-10291400	chr18	10291301	10291400	100	3.59924	0.0411595	1	11	16
		chr18:10594401-10594500	chr18	10594401	10594500	100	2.63326	0.0268398	1	4	14
		chr18:10594501-10594600	chr18	10594501	10594600	100	2.3921	0.0465974	1	11	14
		chr18:10594601-10594700	chr18	10594601	10594700	100	3.01635	0.0208352	1	9	10
		chr19:171601-171700	chr19	171601	171700	100	-2.67834	0.0400197	1	8	9
		chr19:171701-171800	chr19	171701	171800	100	-2.67834	0.0400111	1	3	12
		chr19:171801-171900	chr19	171801	171900	100	-2.67834	0.0400037	1	3	13
		chr19:326001-326100	chr19	326001	326100	100	-2.1028	0.0217611	1	2	10
		chr19:347601-347700	chr19	347601	347700	100	-3.61222	0.0316828	1	2	11
		chr19:347701-347800	chr19	347701	347800	100	-3.61222	0.0316842	1	5	12
		chr19:347801-347900	chr19	347801	347900	100	-3.61223	0.0316706	1	4	13
		chr19:2723901-2724000	chr19	2723901	2724000	100	3.78304	0.0301347	1	7	16
		chr19:2724001-2724100	chr19	2724001	2724100	100	3.78304	0.0301234	1	3	9
		chr19:2724101-2724200	chr19	2724101	2724200	100	3.78304	0.0301121	1	5	6
		chr19:2724201-2724300	chr19	2724201	2724300	100	3.78304	0.0301144	1	2	8
		chr19:4557401-4557500	chr19	4557401	4557500	100	2.06298	0.0442804	1	1	12
		chr19:5945001-5945100	chr19	5945001	5945100	100	3.50109	0.0356136	1	4	12
		chr19:5945101-5945200	chr19	5945101	5945200	100	3.50108	0.0356232	1	3	10
		chr19:6063501-6063600	chr19	6063501	6063600	100	3.59195	0.0410502	1	8	11
		chr19:6063601-6063700	chr19	6063601	6063700	100	3.59195	0.0410545	1	9	12
		chr19:6063701-6063800	chr19	6063701	6063800	100	3.59194	0.0410615	1	8	11
		chr19:6086301-6086400	chr19	6086301	6086400	100	-2.61858	0.0403879	1	3	8
		chr19:6086401-6086500	chr19	6086401	6086500	100	-2.61857	0.040393	1	5	15
		chr20:49001-49100	chr20	49001	49100	100	-2.20714	0.00139874	1	3	8
		chr20:49101-49200	chr20	49101	49200	100	-2.20714	0.0013987	1	7	8
		chr20:49201-49300	chr20	49201	49300	100	-2.20714	0.00139866	1	4	8
		chr20:49301-49400	chr20	49301	49400	100	-4.3565	4.1846e-05	0.202562	5	9
		chr20:49401-49500	chr20	49401	49500	100	-4.35652	4.18046e-05	0.202562	13	14
		chr20:49501-49600	chr20	49501	49600	100	-4.35653	4.17735e-05	0.202562	6	11
		chr20:488901-489000	chr20	488901	489000	100	-3.64707	0.0278159	1	3	5
		chr20:489001-489100	chr20	489001	489100	100	-3.64707	0.0278071	1	5	11
		chr20:1498601-1498700	chr20	1498601	1498700	100	-0.67555	0.0412387	1	7	17
		chr20:3905701-3905800	chr20	3905701	3905800	100	-2.04404	0.029452	1	3	14
		chr20:5657401-5657500	chr20	5657401	5657500	100	-1.81717	0.0379379	1	2	5
		chr20:5676101-5676200	chr20	5676101	5676200	100	-1.00447	0.0344291	1	3	11
		chr20:7077701-7077800	chr20	7077701	7077800	100	-2.58388	0.0155137	1	1	4
		chr20:7077801-7077900	chr20	7077801	7077900	100	-2.58388	0.0155144	1	1	4
		chr20:7077901-7078000	chr20	7077901	7078000	100	-2.58388	0.0155151	1	1	5
		chr20:10035101-10035200	chr20	10035101	10035200	100	-3.67428	0.0214117	1	3	13
		chr20:10528001-10528100	chr20	10528001	10528100	100	-3.81182	0.00362111	1	2	11
		chr20:10528101-10528200	chr20	10528101	10528200	100	-3.81182	0.00362215	1	3	8
		chr20:10528201-10528300	chr20	10528201	10528300	100	-3.81183	0.00362351	1	6	13
		chr20:10791101-10791200	chr20	10791101	10791200	100	-3.89238	0.0178371	1	4	11
		chr20:10791201-10791300	chr20	10791201	10791300	100	-3.89237	0.0178284	1	2	10
		chr21:608001-608100	chr21	608001	608100	100	-2.65648	0.0370716	1	2	11
		chr21:608101-608200	chr21	608101	608200	100	-2.65652	0.037049	1	8	12
		chr21:608201-608300	chr21	608201	608300	100	-2.65656	0.0370264	1	4	10
		chr21:690801-690900	chr21	690801	690900	100	3.78538	0.0328609	1	3	11
		chr21:3869701-3869800	chr21	3869701	3869800	100	3.74233	0.0124999	1	5	17
		chr21:3869801-3869900	chr21	3869801	3869900	100	3.50232	0.049434	1	3	9
		chr21:3869901-3870000	chr21	3869901	3870000	100	3.50232	0.0494283	1	8	12
		chr21:4973701-4973800	chr21	4973701	4973800	100	-2.47647	0.033761	1	5	15
		chr21:4973801-4973900	chr21	4973801	4973900	100	-2.47646	0.0337559	1	5	13
		chr22:12001-12100	chr22	12001	12100	100	-1.5404	0.0237435	1	9	17
		chr22:12101-12200	chr22	12101	12200	100	-1.5404	0.023746	1	8	18
		chr22:2835501-2835600	chr22	2835501	2835600	100	-3.66854	0.0201068	1	1	6
		chr22:2835601-2835700	chr22	2835601	2835700	100	-3.66854	0.0200973	1	3	6
		chr22:2835701-2835800	chr22	2835701	2835800	100	-3.66854	0.0200968	1	2	9
		chr22:2861101-2861200	chr22	2861101	2861200	100	-3.82696	0.0425449	1	3	6
		chr23:2681201-2681300	chr23	2681201	2681300	100	3.49076	0.0345791	1	4	12
		chr23:2681301-2681400	chr23	2681301	2681400	100	3.49076	0.0345726	1	0	6
		chr23:4109501-4109600	chr23	4109501	4109600	100	-3.05739	0.0261277	1	5	14
		chr23:4955101-4955200	chr23	4955101	4955200	100	-4.60102	0.0159446	1	7	17
		chr23:4955201-4955300	chr23	4955201	4955300	100	-4.60101	0.0159364	1	7	8
		chr23:4955301-4955400	chr23	4955301	4955400	100	-4.60101	0.0159233	1	13	16
		chr23:4955401-4955500	chr23	4955401	4955500	100	-4.60101	0.0159145	1	7	8
		chr23:4957701-4957800	chr23	4957701	4957800	100	-3.73312	0.0495564	1	3	8
		chr23:4957801-4957900	chr23	4957801	4957900	100	-3.73312	0.0495401	1	7	11
		chr23:4957901-4958000	chr23	4957901	4958000	100	-3.73312	0.0495293	1	7	11
		chr23:5017101-5017200	chr23	5017101	5017200	100	2.57653	0.0348632	1	9	14
		chr23:5367201-5367300	chr23	5367201	5367300	100	-3.82161	0.00556838	1	6	12
		chr23:5367301-5367400	chr23	5367301	5367400	100	-3.92213	0.0129766	1	4	9
		chr24:2807301-2807400	chr24	2807301	2807400	100	-2.49849	0.0392961	1	1	10
		chr24:3829801-3829900	chr24	3829801	3829900	100	3.06317	0.029319	1	6	10
		chr24:5663501-5663600	chr24	5663501	5663600	100	-3.64417	0.0311728	1	0	13
		chr24:5663601-5663700	chr24	5663601	5663700	100	-3.64416	0.0311849	1	1	9
		chr25:804801-804900	chr25	804801	804900	100	-2.16755	0.0196909	1	4	12
		chr25:804901-805000	chr25	804901	805000	100	-2.25461	0.0147217	1	9	11
		chr25:805001-805100	chr25	805001	805100	100	-2.25458	0.0147083	1	8	15
		chr25:1418301-1418400	chr25	1418301	1418400	100	3.66603	0.0416803	1	3	8
		chr25:1679501-1679600	chr25	1679501	1679600	100	-3.74285	0.0374114	1	5	14
		chr25:2140701-2140800	chr25	2140701	2140800	100	-4.6066	0.0159624	1	3	8
		chr25:2140801-2140900	chr25	2140801	2140900	100	-4.60659	0.0159509	1	2	7
		chr25:2140901-2141000	chr25	2140901	2141000	100	-4.60659	0.0159394	1	2	7
		chr25:2344501-2344600	chr25	2344501	2344600	100	3.84909	0.0389814	1	4	13
		chr25:2344601-2344700	chr25	2344601	2344700	100	3.8491	0.0389728	1	0	3
		chr25:2344701-2344800	chr25	2344701	2344800	100	3.8491	0.0389645	1	2	4
		chr25:2344801-2344900	chr25	2344801	2344900	100	3.84911	0.0389575	1	2	10
		chr25:2465201-2465300	chr25	2465201	2465300	100	3.60309	0.0379679	1	4	16
		chr25:2808001-2808100	chr25	2808001	2808100	100	3.73609	0.03809	1	4	13
		chr25:2808101-2808200	chr25	2808101	2808200	100	3.73608	0.0380974	1	3	8
		chr26:654101-654200	chr26	654101	654200	100	2.82279	0.00864356	1	4	11
		chr26:1313701-1313800	chr26	1313701	1313800	100	-3.88718	0.0130723	1	4	12
		chr26:3554101-3554200	chr26	3554101	3554200	100	4.13154	0.00374107	1	5	12
		chr26:3554201-3554300	chr26	3554201	3554300	100	3.82891	0.00798766	1	5	12
		chr26:3554301-3554400	chr26	3554301	3554400	100	3.60397	0.01913	1	4	6
		chr26:4552801-4552900	chr26	4552801	4552900	100	4.80805	0.0043612	1	1	9
		chr26:4552901-4553000	chr26	4552901	4553000	100	4.80805	0.00435778	1	0	0
		chr26:4553001-4553100	chr26	4553001	4553100	100	4.80805	0.00435411	1	0	0
		chr26:4553101-4553200	chr26	4553101	4553200	100	4.80805	0.00435186	1	1	2
		chr27:1445401-1445500	chr27	1445401	1445500	100	3.53564	0.0495153	1	1	9
		chr27:1445501-1445600	chr27	1445501	1445600	100	3.53564	0.0495162	1	1	6
		chr27:1445601-1445700	chr27	1445601	1445700	100	3.53564	0.049502	1	4	6
		chr27:1445701-1445800	chr27	1445701	1445800	100	3.53564	0.0494879	1	2	8
		chr27:1445801-1445900	chr27	1445801	1445900	100	3.53564	0.0494738	1	3	3
		chr27:5285501-5285600	chr27	5285501	5285600	100	-3.0646	0.00916483	1	12	12
		chr27:5285601-5285700	chr27	5285601	5285700	100	-3.16814	0.00677337	1	9	10
		chr27:5285701-5285800	chr27	5285701	5285800	100	-3.16814	0.00677416	1	9	10
		chr27:5470401-5470500	chr27	5470401	5470500	100	3.71677	0.0173338	1	2	11
		chr28:5901-6000	chr28	5901	6000	100	-4.0207	0.00536582	1	1	5
		chr28:6001-6100	chr28	6001	6100	100	-4.0207	0.00536263	1	1	8
		chr28:787201-787300	chr28	787201	787300	100	-2.61121	0.0318677	1	9	13
		chr28:1400401-1400500	chr28	1400401	1400500	100	-3.65875	0.0191107	1	9	13
		chr28:1400501-1400600	chr28	1400501	1400600	100	-3.65875	0.019106	1	5	8
		chr28:1400601-1400700	chr28	1400601	1400700	100	-3.65875	0.0191031	1	10	16
		chr28:1400701-1400800	chr28	1400701	1400800	100	-3.95937	0.0027305	1	7	9
		chr28:1737301-1737400	chr28	1737301	1737400	100	2.98434	0.0341588	1	5	9
		chr28:1737401-1737500	chr28	1737401	1737500	100	2.17382	0.0336136	1	4	13
		chr28:3182301-3182400	chr28	3182301	3182400	100	-2.73525	0.0226796	1	5	11
		chr28:3328401-3328500	chr28	3328401	3328500	100	-3.48467	0.0211822	1	8	16
		chr28:3472601-3472700	chr28	3472601	3472700	100	-2.60065	0.0286171	1	10	14
		chr28:3472701-3472800	chr28	3472701	3472800	100	-3.04444	0.0213716	1	3	6
		chr28:3472801-3472900	chr28	3472801	3472900	100	-3.04443	0.0213707	1	9	16
		chrZ:90801-90900	chrZ	90801	90900	100	3.74173	0.029753	1	2	5
		chrZ:90901-91000	chrZ	90901	91000	100	3.74173	0.0297425	1	3	8
		chrZ:91001-91100	chrZ	91001	91100	100	3.74173	0.0297319	1	1	9
		chrZ:8390501-8390600	chrZ	8390501	8390600	100	-1.30518	0.00833097	1	3	8
		chrZ:8390601-8390700	chrZ	8390601	8390700	100	-1.30517	0.00832587	1	7	11
		chrZ:8395201-8395300	chrZ	8395201	8395300	100	-1.53172	0.0208771	1	4	7
		chrZ:8395301-8395400	chrZ	8395301	8395400	100	-1.53172	0.0208795	1	1	11
		chrZ:8413101-8413200	chrZ	8413101	8413200	100	1.44014	0.0386756	1	3	10
		chrZ:8425401-8425500	chrZ	8425401	8425500	100	-1.04564	0.0489692	1	5	18
		chrZ:8425501-8425600	chrZ	8425501	8425600	100	-1.04564	0.0489791	1	2	5
		chrZ:8425601-8425700	chrZ	8425601	8425700	100	-1.04564	0.0489657	1	9	14
		chrZ:8430301-8430400	chrZ	8430301	8430400	100	-1.79674	0.0465585	1	2	11
		chrZ:8430801-8430900	chrZ	8430801	8430900	100	-3.08051	0.00550916	1	2	9
		chrZ:8446701-8446800	chrZ	8446701	8446800	100	-1.21238	0.0283487	1	4	17
		chrZ:8446801-8446900	chrZ	8446801	8446900	100	-1.21237	0.0283389	1	3	5
		chrZ:8446901-8447000	chrZ	8446901	8447000	100	-1.21235	0.0283275	1	8	14
		chrZ:8463801-8463900	chrZ	8463801	8463900	100	0.866291	0.035576	1	5	13
		chrZ:8463901-8464000	chrZ	8463901	8464000	100	0.866292	0.035571	1	5	14
		chrZ:8467301-8467400	chrZ	8467301	8467400	100	2.70605	0.0233893	1	2	9
		chrZ:8467401-8467500	chrZ	8467401	8467500	100	2.70605	0.0233857	1	3	9
		chrZ:9054801-9054900	chrZ	9054801	9054900	100	-1.85895	0.0309193	1	6	8
		chrZ:9054901-9055000	chrZ	9054901	9055000	100	-2.48033	0.00857299	1	4	6
		chrZ:9055001-9055100	chrZ	9055001	9055100	100	-2.48032	0.00857037	1	5	10
		chrZ:12758001-12758100	chrZ	12758001	12758100	100	3.61018	0.0416529	1	0	7
		chrZ:12758101-12758200	chrZ	12758101	12758200	100	3.61018	0.0416522	1	2	8
		chrZ:12758201-12758300	chrZ	12758201	12758300	100	3.61018	0.0416645	1	0	5
		chrZ:16929601-16929700	chrZ	16929601	16929700	100	-4.09289	0.00318236	1	12	13
		chrZ:16929701-16929800	chrZ	16929701	16929800	100	-4.09288	0.00318342	1	6	13
		chrZ:16929801-16929900	chrZ	16929801	16929900	100	-4.09289	0.00318214	1	6	11
		chrZ:16929901-16930000	chrZ	16929901	16930000	100	-4.01321	0.00490475	1	5	13
		chrZ:25686301-25686400	chrZ	25686301	25686400	100	1.61525	0.0398497	1	3	10
		chrZ:27193001-27193100	chrZ	27193001	27193100	100	-2.58872	0.0277572	1	1	9
		chrZ:27193101-27193200	chrZ	27193101	27193200	100	-2.68694	0.02748	1	1	7
		chrZ:27193201-27193300	chrZ	27193201	27193300	100	-2.77935	0.00797006	1	4	14
		chrZ:34309701-34309800	chrZ	34309701	34309800	100	-4.0445	0.00829804	1	3	8
		chrZ:34309801-34309900	chrZ	34309801	34309900	100	-2.83147	0.00312821	1	2	10
		chrZ:34340201-34340300	chrZ	34340201	34340300	100	-2.4529	0.016759	1	4	9
		chrZ:34340301-34340400	chrZ	34340301	34340400	100	-3.69965	0.0197202	1	2	8
		chrZ:34404701-34404800	chrZ	34404701	34404800	100	-2.51674	0.0189256	1	3	9
		chrZ:38633701-38633800	chrZ	38633701	38633800	100	3.60353	0.0310672	1	1	5
		chrZ:38633801-38633900	chrZ	38633801	38633900	100	3.60353	0.0310682	1	2	8
		chrZ:38633901-38634000	chrZ	38633901	38634000	100	3.60352	0.0310724	1	2	3
		chrZ:38634001-38634100	chrZ	38634001	38634100	100	3.60352	0.0310764	1	0	8
		chrZ:52859901-52860000	chrZ	52859901	52860000	100	-3.0725	0.0124106	1	2	10
		chrZ:52860001-52860100	chrZ	52860001	52860100	100	-3.07251	0.0124163	1	4	6
		chrZ:52860101-52860200	chrZ	52860101	52860200	100	-3.07252	0.0124206	1	5	15
		chrZ:67242501-67242600	chrZ	67242501	67242600	100	3.51185	0.0244527	1	2	11
		chrZ:67242601-67242700	chrZ	67242601	67242700	100	3.51185	0.0244517	1	4	8
		chrZ:67242701-67242800	chrZ	67242701	67242800	100	3.51185	0.0244508	1	4	17
		chrZ:67242801-67242900	chrZ	67242801	67242900	100	3.51185	0.0244498	1	2	8
		chrZ:67986801-67986900	chrZ	67986801	67986900	100	1.16484	0.0166363	1	0	2
		chrZ:67986901-67987000	chrZ	67986901	67987000	100	1.16486	0.0166321	1	7	14
		chrZ:67987001-67987100	chrZ	67987001	67987100	100	1.16487	0.0166286	1	5	13
		chrZ:67987101-67987200	chrZ	67987101	67987200	100	1.23529	0.0105328	1	4	9
		chrZ:70400401-70400500	chrZ	70400401	70400500	100	-5.38381	0.000145834	0.352966	1	9
		chrZ:70400501-70400600	chrZ	70400501	70400600	100	-5.38381	0.000145786	0.352966	0	6
		chrZ:70400601-70400700	chrZ	70400601	70400700	100	-5.38381	0.000145743	0.352966	1	1
		chrZ:73651001-73651100	chrZ	73651001	73651100	100	-3.86452	0.0069559	1	1	7
		chrZ:73679101-73679200	chrZ	73679101	73679200	100	-2.18303	0.0388975	1	3	11
		chrZ:73679201-73679300	chrZ	73679201	73679300	100	-2.18303	0.038894	1	6	13
		chrZ:73679301-73679400	chrZ	73679301	73679400	100	-2.18302	0.0389104	1	3	11
		chrZ:73773501-73773600	chrZ	73773501	73773600	100	-1.93564	0.00683507	1	1	8
		chrZ:73773601-73773700	chrZ	73773601	73773700	100	-1.93563	0.00683018	1	1	5
		chrZ:73773701-73773800	chrZ	73773701	73773800	100	-1.93563	0.00683039	1	4	7
		chrZ:73773801-73773900	chrZ	73773801	73773900	100	-1.93561	0.00682547	1	2	9
		chrZ:73833801-73833900	chrZ	73833801	73833900	100	-2.10859	0.0386022	1	3	8
		chrZ:73833901-73834000	chrZ	73833901	73834000	100	-2.10858	0.0386114	1	1	6
		chrZ:73834001-73834100	chrZ	73834001	73834100	100	-2.10859	0.0385958	1	3	10
		chrZ:73843901-73844000	chrZ	73843901	73844000	100	-2.71173	0.0390155	1	2	7
		chrZ:73844001-73844100	chrZ	73844001	73844100	100	-2.71172	0.0390118	1	4	11
		chrZ:73844101-73844200	chrZ	73844101	73844200	100	-2.23538	0.0377848	1	5	12
		chrZ:74096201-74096300	chrZ	74096201	74096300	100	-2.00699	0.0493565	1	12	17
		chrZ:74147001-74147100	chrZ	74147001	74147100	100	1.521	0.0414351	1	2	9
		chrZ:74371101-74371200	chrZ	74371101	74371200	100	1.56241	0.0198054	1	3	8
		chrZ:74371201-74371300	chrZ	74371201	74371300	100	2.67699	0.00893829	1	5	9
		chrZ:74371301-74371400	chrZ	74371301	74371400	100	4.06413	0.00718226	1	1	7
		chrZ:74435401-74435500	chrZ	74435401	74435500	100	2.89913	0.0217797	1	1	7
		chrZ:74677801-74677900	chrZ	74677801	74677900	100	-2.46115	0.0483252	1	1	5
		chrZ:74677901-74678000	chrZ	74677901	74678000	100	-2.46114	0.0483188	1	5	7
		chrZ:74678001-74678100	chrZ	74678001	74678100	100	-2.46114	0.048317	1	2	5
		chrZ:74678101-74678200	chrZ	74678101	74678200	100	-2.46113	0.0483064	1	2	6
		chrZ:74961601-74961700	chrZ	74961601	74961700	100	-0.905288	0.0437237	1	4	11
		chrZ:74961701-74961800	chrZ	74961701	74961800	100	-1.13162	0.0179929	1	2	6
		chrZ:74961801-74961900	chrZ	74961801	74961900	100	-1.13162	0.0179929	1	0	8
		chrZ:74961901-74962000	chrZ	74961901	74962000	100	-1.51964	0.0166802	1	4	7
		chrZ:74962001-74962100	chrZ	74962001	74962100	100	-1.32885	0.0355485	1	3	8
		chrZ:75034101-75034200	chrZ	75034101	75034200	100	-2.407	0.00120223	1	0	8
		chrZ:75034201-75034300	chrZ	75034201	75034300	100	-2.40699	0.00120183	1	2	11
		chrZ:75219401-75219500	chrZ	75219401	75219500	100	-1.70151	0.0366254	1	4	9
		chrZ:75219501-75219600	chrZ	75219501	75219600	100	-1.7015	0.0366353	1	3	8
		chrZ:75219601-75219700	chrZ	75219601	75219700	100	-1.70149	0.0366452	1	1	7
		chrZ:75314401-75314500	chrZ	75314401	75314500	100	-1.85349	0.00506596	1	3	10
		chrZ:75314501-75314600	chrZ	75314501	75314600	100	-1.85349	0.00506443	1	3	7
		chrZ:75314601-75314700	chrZ	75314601	75314700	100	-1.44704	0.00806502	1	1	7
		chrZ:75362601-75362700	chrZ	75362601	75362700	100	-1.60962	0.0492227	1	1	2
		chrZ:75362701-75362800	chrZ	75362701	75362800	100	-2.00345	0.0288477	1	2	8
		chrZ:75362801-75362900	chrZ	75362801	75362900	100	-2.00344	0.0288444	1	1	5
		chrZ:75362901-75363000	chrZ	75362901	75363000	100	-2.00343	0.028841	1	1	7
		chrZ:75455901-75456000	chrZ	75455901	75456000	100	-2.79424	0.0251995	1	1	4
		chrZ:75456001-75456100	chrZ	75456001	75456100	100	-2.79424	0.0251999	1	3	7
		chrZ:75456101-75456200	chrZ	75456101	75456200	100	-2.79424	0.025197	1	2	6
		chrZ:75793801-75793900	chrZ	75793801	75793900	100	-0.765641	0.0155863	1	3	13
		chrZ:75793901-75794000	chrZ	75793901	75794000	100	-0.765641	0.0155863	1	4	9
		chrZ:75794001-75794100	chrZ	75794001	75794100	100	-0.801289	0.0117536	1	2	15
		chrZ:75820101-75820200	chrZ	75820101	75820200	100	-0.916616	0.0448945	1	4	10
		chrZ:75820501-75820600	chrZ	75820501	75820600	100	-0.825165	0.0259374	1	3	8
		chrZ:76038701-76038800	chrZ	76038701	76038800	100	-1.31571	0.0208137	1	4	11
		chrZ:76067401-76067500	chrZ	76067401	76067500	100	2.26466	0.0121269	1	5	16
		chrZ:76469101-76469200	chrZ	76469101	76469200	100	-0.845003	0.0237873	1	1	10
		chrZ:76469201-76469300	chrZ	76469201	76469300	100	-0.86592	0.0238198	1	4	11
		chrZ:76469301-76469400	chrZ	76469301	76469400	100	-0.904629	0.016955	1	6	10
		chrZ:76502801-76502900	chrZ	76502801	76502900	100	-1.80992	0.0373009	1	2	4
		chrZ:76546201-76546300	chrZ	76546201	76546300	100	-0.809143	0.0184263	1	1	11
		chrZ:76982001-76982100	chrZ	76982001	76982100	100	2.261	0.0210596	1	2	13
		chrZ:77297601-77297700	chrZ	77297601	77297700	100	-1.84286	0.0296898	1	1	6
		chrZ:77297701-77297800	chrZ	77297701	77297800	100	-1.84286	0.0296874	1	3	6
		chrZ:77297801-77297900	chrZ	77297801	77297900	100	-1.84286	0.0296831	1	1	6
		chrZ:77297901-77298000	chrZ	77297901	77298000	100	-1.84286	0.0296766	1	7	11
		chrZ:77463701-77463800	chrZ	77463701	77463800	100	-0.905417	0.0437237	1	2	8
		chrZ:77948401-77948500	chrZ	77948401	77948500	100	-0.638834	0.0388752	1	2	11
		chrZ:77948501-77948600	chrZ	77948501	77948600	100	-0.667024	0.0294126	1	3	10
		chrZ:77951601-77951700	chrZ	77951601	77951700	100	-2.63379	0.00297869	1	4	15
		chrZ:77951701-77951800	chrZ	77951701	77951800	100	-2.63381	0.00297702	1	3	10
		chrZ:77951801-77951900	chrZ	77951801	77951900	100	-2.63381	0.00297682	1	3	10
		chrZ:77951901-77952000	chrZ	77951901	77952000	100	-2.63381	0.0029775	1	3	10
		chrZ:78133701-78133800	chrZ	78133701	78133800	100	-1.10592	0.0140556	1	12	15
		chrZ:78139101-78139200	chrZ	78139101	78139200	100	-1.9859	0.0271172	1	3	15
		chrZ:78139201-78139300	chrZ	78139201	78139300	100	-1.98589	0.0271188	1	4	10
		chrZ:78139301-78139400	chrZ	78139301	78139400	100	-1.98592	0.0271121	1	3	11
		chrZ:78139401-78139500	chrZ	78139401	78139500	100	-1.98591	0.0271145	1	2	10
		chrZ:78327401-78327500	chrZ	78327401	78327500	100	-0.796069	0.0176688	1	2	10
		chrZ:78327501-78327600	chrZ	78327501	78327600	100	-0.839285	0.0129012	1	4	7
		chrZ:78382001-78382100	chrZ	78382001	78382100	100	1.34772	0.0260927	1	2	9
		chrZ:78382101-78382200	chrZ	78382101	78382200	100	1.4583	0.0242339	1	1	7
		chrZ:78382201-78382300	chrZ	78382201	78382300	100	1.4583	0.0242253	1	4	10
		chrZ:78428801-78428900	chrZ	78428801	78428900	100	-2.67789	0.0137554	1	4	14
		chrZ:78428901-78429000	chrZ	78428901	78429000	100	-2.67789	0.0137581	1	4	10
		chrZ:78429001-78429100	chrZ	78429001	78429100	100	-2.6779	0.0137512	1	2	11
		chrZ:78429101-78429200	chrZ	78429101	78429200	100	-2.67791	0.0137443	1	4	10
		chrZ:78429201-78429300	chrZ	78429201	78429300	100	-2.67792	0.0137374	1	2	11
		chrZ:78491101-78491200	chrZ	78491101	78491200	100	-1.74687	0.0156105	1	6	9
		chrZ:78491201-78491300	chrZ	78491201	78491300	100	-3.2902	0.00303058	1	4	11
		chrZ:78491301-78491400	chrZ	78491301	78491400	100	-4.04577	0.00696271	1	6	10
		chrZ:78491401-78491500	chrZ	78491401	78491500	100	-4.04578	0.00695948	1	4	4
		chrZ:78491501-78491600	chrZ	78491501	78491600	100	-4.04579	0.00695879	1	4	10
		chrZ:80305501-80305600	chrZ	80305501	80305600	100	-1.55106	0.0451717	1	1	9
		chrZ:80305601-80305700	chrZ	80305601	80305700	100	-1.55106	0.0451596	1	6	9
		chrZ:80305701-80305800	chrZ	80305701	80305800	100	-1.55106	0.0451474	1	1	11
		chrZ:80305801-80305900	chrZ	80305801	80305900	100	-1.55106	0.0451695	1	8	13
		chrZ:80344601-80344700	chrZ	80344601	80344700	100	1.23926	0.014235	1	3	12
		chrZ:80344701-80344800	chrZ	80344701	80344800	100	1.24084	0.024493	1	3	7
		chrZ:80344801-80344900	chrZ	80344801	80344900	100	1.30104	0.0276861	1	2	3
		chrZ:80424201-80424300	chrZ	80424201	80424300	100	-1.36887	0.0216363	1	3	6
		chrZ:80424301-80424400	chrZ	80424301	80424400	100	-1.36885	0.0216186	1	5	10
		chrZ:80424401-80424500	chrZ	80424401	80424500	100	-1.36884	0.0216067	1	4	11
		chrZ:80424501-80424600	chrZ	80424501	80424600	100	-1.25341	0.0345524	1	6	13
		chrZ:80859301-80859400	chrZ	80859301	80859400	100	-1.24266	0.0360467	1	4	7
		chrZ:80909701-80909800	chrZ	80909701	80909800	100	-0.63991	0.0264229	1	3	10
		chrZ:82133601-82133700	chrZ	82133601	82133700	100	-1.35504	0.00626916	1	3	13
		chrZ:82240701-82240800	chrZ	82240701	82240800	100	2.33958	0.00202911	1	1	10
		chrZ:82240801-82240900	chrZ	82240801	82240900	100	1.86314	0.0133921	1	4	9
	ROI	chr1:7534015-7534353	chr1	7534015	7534353	339	2.44158	0.0340495	0.479019	3	18
		chr1:80299375-80299780	chr1	80299375	80299780	406	3.68964	0.0127831	0.479019	19	47
		chr1:91231889-91232328	chr1	91231889	91232328	440	3.74191	0.0264755	0.479019	1	10
		chr1:92073582-92073794	chr1	92073582	92073794	213	3.56261	0.0336992	0.479019	1	21
		chr1:111378079-111378673	chr1	111378079	111378673	595	1.22592	0.0481178	0.509236	20	55
		chr1:114235927-114236089	chr1	114235927	114236089	163	1.37178	0.0329142	0.479019	8	24
		chr1:114255811-114256058	chr1	114255811	114256058	248	1.32434	0.0283747	0.479019	11	35
		chr1:116844932-116845138	chr1	116844932	116845138	207	3.85896	0.021047	0.479019	7	28
		chr1:193989085-193989380	chr1	193989085	193989380	296	3.51108	0.0434582	0.479971	1	13
		chr10:18724376-18724607	chr10	18724376	18724607	232	3.5616	0.0336992	0.479019	3	19
		chr10:20047031-20047203	chr10	20047031	20047203	173	4.06321	0.0137211	0.479019	9	20
		chr11:18714953-18715269	chr11	18714953	18715269	317	3.69548	0.0264755	0.479019	4	24
		chr11:19151322-19151565	chr11	19151322	19151565	244	3.80005	0.021047	0.479019	2	18
		chr12:2428276-2428486	chr12	2428276	2428486	211	3.53392	0.0434582	0.479971	6	19
		chr12:2711886-2712133	chr12	2711886	2712133	248	-0.531163	0.0413984	0.479971	25	34
		chr12:8879053-8879262	chr12	8879053	8879262	210	3.78065	0.016384	0.479019	14	26
		chr13:1982796-1983489	chr13	1982796	1983489	694	3.55229	0.0336992	0.479019	16	67
		chr13:8442185-8442365	chr13	8442185	8442365	181	3.53176	0.0434582	0.479971	2	18
		chr13:8549736-8549969	chr13	8549736	8549969	234	3.61107	0.0336992	0.479019	9	18
		chr13:15878887-15879228	chr13	15878887	15879228	342	3.61228	0.0336992	0.479019	16	43
		chr14:7153793-7154066	chr14	7153793	7154066	274	3.60501	0.0336992	0.479019	4	28
		chr14:7157223-7157456	chr14	7157223	7157456	234	3.59876	0.0336992	0.479019	8	27
		chr14:12337347-12337639	chr14	12337347	12337639	293	3.23422	0.000929323	0.461874	10	34
		chr15:5486627-5486946	chr15	5486627	5486946	320	2.31888	0.0284862	0.479019	22	31
		chr15:11123739-11124063	chr15	11123739	11124063	325	3.78199	0.0264755	0.479019	6	25
		chr15:11167060-11167373	chr15	11167060	11167373	314	2.83526	0.0050475	0.479019	19	30
		chr17:635127-635441	chr17	635127	635441	315	-0.507714	0.027062	0.479019	7	34
		chr17:9795615-9797444	chr17	9795615	9797444	1830	3.59006	0.0112401	0.479019	72	164
		chr18:5061192-5061446	chr18	5061192	5061446	255	1.91629	0.0346976	0.479019	9	31
		chr18:6542281-6542510	chr18	6542281	6542510	230	3.51598	0.0434582	0.479971	6	25
		chr18:9753385-9753631	chr18	9753385	9753631	247	3.95508	0.0169112	0.479019	6	21
		chr18:10594452-10594663	chr18	10594452	10594663	212	2.55377	0.0318427	0.479019	20	28
		chr19:2723947-2724137	chr19	2723947	2724137	191	3.73414	0.0264755	0.479019	9	21
		chr19:6063590-6064319	chr19	6063590	6064319	730	3.55852	0.0336992	0.479019	50	82
		chr19:9019039-9019710	chr19	9019039	9019710	672	3.58149	0.0336992	0.479019	38	71
		chr2:256386-257357	chr2	256386	257357	972	3.53302	0.0434582	0.479971	41	130
		chr2:2107107-2107788	chr2	2107107	2107788	682	3.6611	0.0336992	0.479019	4	58
		chr2:10242376-10242839	chr2	10242376	10242839	464	4.13807	0.0112322	0.479019	20	41
		chr2:63249659-63249849	chr2	63249659	63249849	191	3.49851	0.0434582	0.479971	5	25
		chr2:66704195-66704415	chr2	66704195	66704415	221	5.46668	0.00035556	0.353427	4	11
		chr2:89354067-89354679	chr2	89354067	89354679	613	3.95175	0.0169112	0.479019	7	42
		chr2:149510893-149511190	chr2	149510893	149511190	298	3.50437	0.0434582	0.479971	9	33
		chr20:10784665-10785265	chr20	10784665	10785265	601	3.94645	0.0169112	0.479019	23	68
		chr21:690664-691089	chr21	690664	691089	426	3.76007	0.0264755	0.479019	19	50
		chr21:1125845-1126585	chr21	1125845	1126585	741	3.67713	0.0264755	0.479019	15	84
		chr21:3225358-3225521	chr21	3225358	3225521	164	3.50489	0.0434582	0.479971	1	19
		chr21:3869396-3869954	chr21	3869396	3869954	559	3.68844	0.0204467	0.479019	23	70
		chr24:3829705-3830243	chr24	3829705	3830243	539	2.95246	0.0418538	0.479971	37	69
		chr25:1418158-1418659	chr25	1418158	1418659	502	3.62049	0.0336992	0.479019	23	61
		chr25:1704585-1706419	chr25	1704585	1706419	1835	1.95367	0.023502	0.479019	68	171
		chr25:2344557-2344815	chr25	2344557	2344815	259	3.80534	0.0264755	0.479019	4	16
		chr25:2464996-2465407	chr25	2464996	2465407	412	3.53387	0.0434582	0.479971	17	49
		chr26:653838-654336	chr26	653838	654336	499	2.7737	0.0188928	0.479019	34	52
		chr26:1304954-1305335	chr26	1304954	1305335	382	3.58424	0.0336992	0.479019	14	34
		chr26:2234310-2234577	chr26	2234310	2234577	268	3.48164	0.0434582	0.479971	3	22
		chr26:3554060-3554373	chr26	3554060	3554373	314	4.17775	0.00184965	0.479019	15	32
		chr26:4552858-4553138	chr26	4552858	4553138	281	4.774	0.00218284	0.479019	0	4
		chr27:1445496-1445812	chr27	1445496	1445812	317	3.49623	0.0434582	0.479971	7	21
		chr27:1491261-1492179	chr27	1491261	1492179	919	3.54696	0.0211547	0.479019	21	74
		chr27:3927404-3928094	chr27	3927404	3928094	691	3.70965	0.0264755	0.479019	9	45
		chr27:5470271-5470663	chr27	5470271	5470663	393	3.67228	0.0286266	0.479019	12	44
		chr28:3570281-3571256	chr28	3570281	3571256	976	3.67656	0.0264755	0.479019	26	92
		chr3:21701718-21701937	chr3	21701718	21701937	220	4.14498	0.0112322	0.479019	6	20
		chr3:30316225-30316452	chr3	30316225	30316452	228	4.4407	0.00544034	0.479019	5	29
		chr3:108169507-108169677	chr3	108169507	108169677	171	3.6653	0.0336992	0.479019	1	11
		chr4:464355-464746	chr4	464355	464746	392	3.7826	0.021047	0.479019	5	43
		chr5:608986-609176	chr5	608986	609176	191	3.7164	0.0264755	0.479019	7	19
		chr5:5717497-5717944	chr5	5717497	5717944	448	3.8803	0.00423109	0.479019	9	51
		chr5:23745950-23746173	chr5	23745950	23746173	224	3.83954	0.021047	0.479019	3	15
		chr5:48281849-48282123	chr5	48281849	48282123	275	4.49044	0.00461265	0.479019	16	30
		chr5:56635169-56636013	chr5	56635169	56636013	845	3.4935	0.0346049	0.479019	11	62
		chr6:17339825-17340814	chr6	17339825	17340814	990	3.40467	0.0381217	0.479971	16	79
		chr6:22212395-22212784	chr6	22212395	22212784	390	3.69887	0.0336992	0.479019	9	47
		chr6:35036510-35036846	chr6	35036510	35036846	337	3.80837	0.021047	0.479019	3	25
		chr7:5418890-5419438	chr7	5418890	5419438	549	3.71993	0.0264755	0.479019	6	39
		chr7:6634620-6634980	chr7	6634620	6634980	361	4.16472	0.00927027	0.479019	6	24
		chr7:19464482-19465531	chr7	19464482	19465531	1050	3.61474	0.0336992	0.479019	35	68
		chr8:20520250-20520516	chr8	20520250	20520516	267	3.50888	0.0434582	0.479971	10	39
		chrZ:90873-91042	chrZ	90873	91042	170	3.70505	0.0264755	0.479019	4	17
		chrZ:12758066-12758243	chrZ	12758066	12758243	178	3.54352	0.0434582	0.479971	2	14
		chrZ:38633769-38634052	chrZ	38633769	38634052	284	3.53544	0.0434582	0.479971	5	16
		chrZ:67242659-67242821	chrZ	67242659	67242821	163	3.48008	0.027332	0.479019	9	25
		chrZ:67986896-67987116	chrZ	67986896	67987116	221	1.06723	0.0414147	0.479971	12	31
		chrZ:76469205-76469914	chrZ	76469205	76469914	710	-0.929726	0.0114863	0.479019	22	60
		chrZ:77152928-77153827	chrZ	77152928	77153827	900	-0.673383	0.0104712	0.479019	56	91
		chrZ:78133516-78134278	chrZ	78133516	78134278	763	-0.544203	0.028265	0.479019	44	82
		chrZ:78450491-78451404	chrZ	78450491	78451404	914	-0.607147	0.0325603	0.479019	19	71
		chrZ:80246989-80247339	chrZ	80246989	80247339	351	-1.42503	0.0333795	0.479019	14	38
		chrZ:80344462-80344858	chrZ	80344462	80344858	397	1.16914	0.022198	0.479019	10	26
		chrZ:81611746-81613119	chrZ	81611746	81613119	1374	4.03544	0.00617536	0.479019	22	129
		chrZ:82240605-82240942	chrZ	82240605	82240942	338	1.76519	0.00706688	0.479019	7	34
*red color represents overlap between ADJW and ROI

## Sheet: VEP_0.05
BR	Consequence	SYMBOL	Gene	STRAND		SW	Consequence	SYMBOL	Gene	STRAND		UniqueGeneBR	UniqueGeneSW
1:164901436-164901778	intergenic_variant	-	-	-		1:7534014-7534353	intergenic_variant	-	-	-		ENSGALG00000010975	ENSGALG00000015006
1:187130125-187130409	intergenic_variant	-	-	-		1:80299374-80299780	downstream_gene_variant	MAB21L3	ENSGALG00000015006	-1		ENSGALG00000018239	ENSGALG00000019215
1:194436132-194436237	upstream_gene_variant	HPX	ENSGALG00000022586	1		1:91231888-91232328	downstream_gene_variant	ARL6	ENSGALG00000019215	1		ENSGALG00000041687	ENSGALG00000036738
1:194436132-194436237	coding_sequence_variant,intron_variant	TRIM3	ENSGALG00000034004	1		1:92073581-92073794	intron_variant	-	ENSGALG00000036738	1		ENSGALG00000012277	ENSGALG00000022787
1:194651174-194651438	upstream_gene_variant	-	ENSGALG00000045365	-1		1:111378078-111378673	downstream_gene_variant	-	ENSGALG00000022787	1		ENSGALG00000012281	ENSGALG00000038500
1:195730787-195731950	intron_variant	PAAF1	ENSGALG00000017318	1		1:114235926-114236089	upstream_gene_variant	-	ENSGALG00000038500	1		ENSGALG00000026214	ENSGALG00000046613
1:195730787-195731950	upstream_gene_variant	-	ENSGALG00000034865	-1		1:114255810-114256058	coding_sequence_variant,intron_variant	-	ENSGALG00000046613	-1		ENSGALG00000036964	ENSGALG00000025898
1:40853299-40853856	intron_variant	TMTC2	ENSGALG00000010975	1		1:116844931-116845138	intergenic_variant	-	-	-		ENSGALG00000022586	ENSGALG00000036163
1:429837-430252	intergenic_variant	-	-	-		1:193989084-193989380	intergenic_variant	-	-	-		ENSGALG00000034004	ENSGALG00000006282
1:49533574-49533683	upstream_gene_variant	gga-mir-33-1	ENSGALG00000018239	-1		2:256385-257357	intron_variant	-	ENSGALG00000031276	-1		ENSGALG00000045365	ENSGALG00000000528
1:49533574-49533683	intron_variant	SREBF2	ENSGALG00000041687	-1		2:2107106-2107788	downstream_gene_variant	ACKR2	ENSGALG00000005305	1		ENSGALG00000017318	ENSGALG00000000630
1:51015826-51016018	upstream_gene_variant	MAFF	ENSGALG00000012277	-1		2:2107106-2107788	downstream_gene_variant	OBSCN	ENSGALG00000032534	-1		ENSGALG00000034865	ENSGALG00000035882
1:51015826-51016018	coding_sequence_variant,intron_variant	PLA2G6	ENSGALG00000012281	1		2:2107106-2107788	downstream_gene_variant	CYP8B1	ENSGALG00000033511	1		ENSGALG00000006045	ENSGALG00000037784
1:61077944-61078198	intron_variant	LRTM2	ENSGALG00000026214	1		2:10242375-10242839	intron_variant	DIP2C	ENSGALG00000006652	-1		ENSGALG00000008385	ENSGALG00000031001
1:61077944-61078198	intron_variant	-	ENSGALG00000036964	-1		2:63249658-63249849	3_prime_UTR_variant,intron_variant	C1orf145	ENSGALG00000019570	-1		ENSGALG00000035587	ENSGALG00000005678
2:113381947-113382367	intergenic_variant	-	-	-		2:66704194-66704415	intron_variant	IRF4	ENSGALG00000012830	1		ENSGALG00000031718	ENSGALG00000002790
2:189006-189224	downstream_gene_variant	-	ENSGALG00000043576	-1		2:89354066-89354679	intergenic_variant	-	-	-		ENSGALG00000024466	ENSGALG00000006424
2:256974-257649	intron_variant	-	ENSGALG00000031276	-1		2:149510892-149511190	intergenic_variant	-	-	-		ENSGALG00000002458	ENSGALG00000006290
3:25898087-25898529	downstream_gene_variant	RF02252	ENSGALG00000027749	1		3:21701717-21701937	intergenic_variant	-	-	-		ENSGALG00000039818	ENSGALG00000030826
3:25898087-25898529	coding_sequence_variant	SIX3	ENSGALG00000032259	1		3:30316224-30316452	intron_variant	TCTE1	ENSGALG00000010165	1		ENSGALG00000002853	ENSGALG00000032279
3:30327384-30327986	upstream_gene_variant	-	ENSGALG00000010169	-1		3:108169506-108169677	intron_variant	PKHD1	ENSGALG00000042136	1		ENSGALG00000003891	ENSGALG00000040131
3:30327384-30327986	upstream_gene_variant	-	ENSGALG00000035021	1		4:464354-464746	intron_variant	AR	ENSGALG00000030879	1		ENSGALG00000041972	ENSGALG00000008073
3:45667156-45668127	intron_variant	IGF2R	ENSGALG00000011621	-1		5:608985-609176	intron_variant	-	ENSGALG00000034605	1		ENSGALG00000030532	ENSGALG00000038301
3:48290883-48291337	upstream_gene_variant	PPIL4	ENSGALG00000012364	-1		5:5717496-5717944	intergenic_variant	-	-	-		ENSGALG00000006222	ENSGALG00000035410
3:48290883-48291337	coding_sequence_variant,5_prime_UTR_variant,intron_variant	GINM1	ENSGALG00000012370	1		5:23745949-23746173	intergenic_variant	-	-	-		ENSGALG00000025326	ENSGALG00000002877
3:97197230-97197434	intron_variant	HPCAL1	ENSGALG00000016443	1		5:48281848-48282123	intergenic_variant	-	-	-		ENSGALG00000000693	ENSGALG00000039172
4:1212080-1212352	coding_sequence_variant,3_prime_UTR_variant	-	ENSGALG00000004475	1		5:56635168-56636013	intergenic_variant	-	-	-		ENSGALG00000000699	ENSGALG00000040896
4:1212080-1212352	upstream_gene_variant	WNT11B	ENSGALG00000004401	1		6:17339824-17340814	intergenic_variant	-	-	-		ENSGALG00000023437	ENSGALG00000043607
4:1212080-1212352	upstream_gene_variant	gga-mir-6658	ENSGALG00000028208	-1		6:22212394-22212784	intron_variant	-	ENSGALG00000007508	1		ENSGALG00000002335	ENSGALG00000027415
4:14214811-14215074	coding_sequence_variant,intron_variant	-	ENSGALG00000008326	1		6:35036509-35036846	downstream_gene_variant	PWWP2B	ENSGALG00000010491	1		ENSGALG00000046133	ENSGALG00000001263
4:2540548-2540943	non_coding_transcript_exon_variant,intron_variant	-	ENSGALG00000044385	-1		7:5418889-5419438	intron_variant	AGAP1	ENSGALG00000004045	-1		ENSGALG00000003839	ENSGALG00000023703
4:4253260-4253516	intron_variant	FHL1	ENSGALG00000006190	1		7:6634619-6634980	intron_variant	COL18A1	ENSGALG00000038311	1		ENSGALG00000045878	ENSGALG00000005575
4:740033-740180	intergenic_variant	-	-	-		7:19464481-19465531	intergenic_variant	-	-	-		ENSGALG00000006824	ENSGALG00000031276
4:85246929-85247063	intron_variant	CTBP1	ENSGALG00000039942	1		8:20520249-20520516	downstream_gene_variant	DMAP1	ENSGALG00000010104	1		ENSGALG00000006802	ENSGALG00000005305
4:884550-884663	intergenic_variant	-	-	-		8:20520249-20520516	downstream_gene_variant	ERI3	ENSGALG00000010106	-1		ENSGALG00000006867	ENSGALG00000032534
5:16888283-16888371	intergenic_variant	-	-	-		10:18724375-18724607	intron_variant	SMAD6	ENSGALG00000025898	1		ENSGALG00000041419	ENSGALG00000033511
5:38198270-38198563	upstream_gene_variant	MLH3	ENSGALG00000010304	-1		10:20047030-20047203	upstream_gene_variant	ZNF710	ENSGALG00000036163	1		ENSGALG00000039385	ENSGALG00000006652
5:38198270-38198563	coding_sequence_variant	-	ENSGALG00000010309	1		11:18714952-18715269	downstream_gene_variant	-	ENSGALG00000006282	-1		ENSGALG00000029980	ENSGALG00000019570
5:38198270-38198563	upstream_gene_variant	ACYP1	ENSGALG00000010307	-1		11:19151321-19151565	intron_variant	DBNDD1	ENSGALG00000000528	-1		ENSGALG00000035037	ENSGALG00000012830
5:390142-390360	downstream_gene_variant	AIP	ENSGALG00000040247	-1		11:19151321-19151565	upstream_gene_variant	HAS3	ENSGALG00000000630	1		ENSGALG00000007785	ENSGALG00000042199
5:390142-390360	coding_sequence_variant,intron_variant	PITPNM1	ENSGALG00000034939	1		11:19151321-19151565	downstream_gene_variant	-	ENSGALG00000035882	1		ENSGALG00000007819	ENSGALG00000000966
5:39036079-39036268	upstream_gene_variant	RF00001	ENSGALG00000024525	1		12:2428275-2428486	intron_variant	DAG1	ENSGALG00000037784	-1		ENSGALG00000001383	ENSGALG00000036728
5:5684360-5684877	intergenic_variant	-	-	-		12:2711885-2712133	non_coding_transcript_exon_variant,intron_variant	-	ENSGALG00000031001	1		ENSGALG00000003722	ENSGALG00000002377
6:11562192-11562581	coding_sequence_variant,intron_variant	ADAMTS14	ENSGALG00000039219	1		12:8879052-8879262	intron_variant	FLNB	ENSGALG00000005678	1		ENSGALG00000045860	ENSGALG00000002888
6:11562192-11562581	downstream_gene_variant	ADAMTS14	ENSGALG00000039219	1		13:1982795-1983489	intergenic_variant	-	-	-		ENSGALG00000006794	ENSGALG00000006673
6:14916139-14916414	downstream_gene_variant	-	ENSGALG00000005007	1		13:8442184-8442365	intergenic_variant	-	-	-		ENSGALG00000004460	ENSGALG00000006715
6:14916139-14916414	upstream_gene_variant	DUSP13	ENSGALG00000005017	1		13:8549735-8549969	intron_variant	ABLIM3	ENSGALG00000002790	-1		ENSGALG00000004530	ENSGALG00000013253
6:16960644-16961398	intron_variant	PSD	ENSGALG00000042551	-1		13:15878886-15879228	intron_variant	JADE2	ENSGALG00000006424	-1		ENSGALG00000040770	ENSGALG00000026070
6:16960644-16961398	upstream_gene_variant	-	ENSGALG00000038513	1		14:7153792-7154066	intron_variant	HS3ST4	ENSGALG00000006290	1		ENSGALG00000006068	ENSGALG00000040696
6:17299559-17299780	intergenic_variant	-	-	-		14:7157222-7157456	intron_variant	HS3ST4	ENSGALG00000006290	1		ENSGALG00000035918	ENSGALG00000044505
6:22336989-22337936	downstream_gene_variant	MMS19	ENSGALG00000007572	1		14:12337346-12337639	downstream_gene_variant	CLCN7	ENSGALG00000030826	-1		ENSGALG00000038884	ENSGALG00000011570
6:22336989-22337936	coding_sequence_variant,intron_variant	ZDHHC16	ENSGALG00000007592	-1		14:12337346-12337639	downstream_gene_variant	-	ENSGALG00000032279	1		ENSGALG00000038325	ENSGALG00000026796
6:22336989-22337936	upstream_gene_variant	EXOSC1	ENSGALG00000039917	1		15:5486626-5486946	coding_sequence_variant,intron_variant	-	ENSGALG00000040131	-1		ENSGALG00000007821	ENSGALG00000037869
6:32149527-32149879	intron_variant	LHPP	ENSGALG00000030925	1		15:11123738-11124063	intron_variant	NF2	ENSGALG00000008073	-1		ENSGALG00000002551	ENSGALG00000030407
6:32172398-32172575	intron_variant	FAM53B	ENSGALG00000009718	-1		15:11123738-11124063	downstream_gene_variant	NF2	ENSGALG00000008073	-1		ENSGALG00000002597	ENSGALG00000037379					BR	25:2640725-2640866
6:34188927-34189035	intergenic_variant	-	-	-		15:11167059-11167373	coding_sequence_variant,3_prime_UTR_variant,intron_variant	NIPSNAP1	ENSGALG00000038301	1		ENSGALG00000002610	ENSGALG00000014656
6:34879953-34880276	intergenic_variant	-	-	-		17:635126-635441	downstream_gene_variant	-	ENSGALG00000035410	1		ENSGALG00000002201	ENSGALG00000043416					SW	25:2464995-2465407
6:34953726-34954162	intron_variant	STK32C	ENSGALG00000020615	-1		17:9795614-9797444	intergenic_variant	-	-	-		ENSGALG00000002205	ENSGALG00000028205
6:510974-511295	intron_variant	-	ENSGALG00000041512	-1		18:5061191-5061446	upstream_gene_variant	LRRC45	ENSGALG00000002877	-1		ENSGALG00000003120	ENSGALG00000040103
6:8082215-8082556	upstream_gene_variant	EGR2	ENSGALG00000040971	1		18:5061191-5061446	downstream_gene_variant	ASPSCR1	ENSGALG00000039172	-1		ENSGALG00000005626	ENSGALG00000000318
6:8082215-8082556	coding_sequence_variant,3_prime_UTR_variant	-	ENSGALG00000041387	-1		18:5061191-5061446	intron_variant	FASN	ENSGALG00000040896	1		ENSGALG00000005630	ENSGALG00000000362
7:10606293-10606528	intergenic_variant	-	-	-		18:5061191-5061446	downstream_gene_variant	CENPX	ENSGALG00000043607	1		ENSGALG00000005623	ENSGALG00000000329
7:22331269-22331774	coding_sequence_variant,intron_variant	STK16	ENSGALG00000011326	-1		18:6542280-6542510	intergenic_variant	-	-	-		ENSGALG00000005951	ENSGALG00000037995
7:22331269-22331774	upstream_gene_variant	GLB1L	ENSGALG00000011328	1		18:9753384-9753631	intergenic_variant	-	-	-		ENSGALG00000021136	ENSGALG00000000703
7:22331269-22331774	downstream_gene_variant	ANKZF1	ENSGALG00000011332	-1		18:10594451-10594663	coding_sequence_variant,intron_variant	GRIN2C	ENSGALG00000027415	-1		ENSGALG00000044503	ENSGALG00000001558
7:22331269-22331774	3_prime_UTR_variant	-	ENSGALG00000000433	1		19:2723946-2724137	intron_variant	GTF2IRD1	ENSGALG00000001263	-1		ENSGALG00000007038	ENSGALG00000001569
7:22331269-22331774	downstream_gene_variant	-	ENSGALG00000000433	1		19:6063589-6064319	coding_sequence_variant,intron_variant	GIT1	ENSGALG00000023703	-1		ENSGALG00000003866	ENSGALG00000001605
7:26399733-26400133	upstream_gene_variant	NIFK	ENSGALG00000011650	-1		19:9019038-9019710	upstream_gene_variant	AKAP1	ENSGALG00000005575	-1		ENSGALG00000001314	ENSGALG00000002848
7:26399733-26400133	intron_variant	TSN	ENSGALG00000011652	1		20:10784664-10785265	intron_variant	SLC12A5	ENSGALG00000042199	1		ENSGALG00000026167	ENSGALG00000000988
7:36453021-36453243	upstream_gene_variant	gga-mir-6546	ENSGALG00000026227	-1		21:690663-691089	coding_sequence_variant,intron_variant	-	ENSGALG00000000966	1		ENSGALG00000001238	ENSGALG00000000857
7:36453021-36453243	intron_variant	ACVR1	ENSGALG00000037301	-1		21:1125844-1126585	intron_variant	PRDM16	ENSGALG00000036728	-1		ENSGALG00000004333	ENSGALG00000000870
8:24334848-24335412	intron_variant	TXNDC12	ENSGALG00000010569	-1		21:3225357-3225521	upstream_gene_variant	ENO1	ENSGALG00000002377	-1		ENSGALG00000004370	ENSGALG00000041204
8:24334848-24335412	upstream_gene_variant	BTF3L4	ENSGALG00000010570	1		21:3869395-3869954	intron_variant	CASZ1	ENSGALG00000002888	-1		ENSGALG00000011816	ENSGALG00000034345
8:24334848-24335412	upstream_gene_variant	TXNDC12	ENSGALG00000010569	-1		24:3829704-3830243	upstream_gene_variant	POU2F3	ENSGALG00000006673	-1		ENSGALG00000032889	ENSGALG00000043285
8:28562844-28563315	intron_variant	-	ENSGALG00000027565	1		24:3829704-3830243	downstream_gene_variant	OAF	ENSGALG00000006715	-1		ENSGALG00000007623	ENSGALG00000032191
8:5191539-5191738	coding_sequence_variant,intron_variant	LMX1A	ENSGALG00000003424	1		25:1418157-1418659	upstream_gene_variant	INSRR	ENSGALG00000013253	-1		ENSGALG00000008023	ENSGALG00000036484
9:13926100-13926940	coding_sequence_variant,5_prime_UTR_variant,intron_variant	IL1RAP	ENSGALG00000007253	-1		25:1418157-1418659	upstream_gene_variant	-	ENSGALG00000026070	-1		ENSGALG00000001828	ENSGALG00000010165
9:14971769-14972007	upstream_gene_variant	SLC51A	ENSGALG00000007478	-1		25:1418157-1418659	downstream_gene_variant	PRCC	ENSGALG00000040696	-1		ENSGALG00000030792	ENSGALG00000042136
9:14971769-14972007	downstream_gene_variant	-	ENSGALG00000040815	-1		25:1418157-1418659	coding_sequence_variant,intron_variant	SH2D2A	ENSGALG00000044505	1		ENSGALG00000026822	ENSGALG00000030879
9:14971769-14972007	upstream_gene_variant	-	ENSGALG00000045593	1		25:1704584-1706419	coding_sequence_variant,3_prime_UTR_variant,intron_variant	ILF2	ENSGALG00000011570	1		ENSGALG00000003657	ENSGALG00000034605
9:22935902-22936223	upstream_gene_variant	-	ENSGALG00000023531	-1		25:1704584-1706419	coding_sequence_variant,3_prime_UTR_variant,intron_variant	SNAPIN	ENSGALG00000026796	-1		ENSGALG00000003665	ENSGALG00000007508
9:2329145-2329455	intergenic_variant	-	-	-		25:1704584-1706419	upstream_gene_variant	-	ENSGALG00000037869	-1		ENSGALG00000003741	ENSGALG00000010491
9:23537756-23538399	downstream_gene_variant	gga-mir-1754	ENSGALG00000032147	-1		25:1704584-1706419	upstream_gene_variant	IL6R	ENSGALG00000030407	1		ENSGALG00000005126	ENSGALG00000004045
9:23827973-23828318	intergenic_variant	-	-	-		25:1704584-1706419	downstream_gene_variant	-	ENSGALG00000037379	1		ENSGALG00000005160	ENSGALG00000038311
9:3693374-3694655	coding_sequence_variant,intron_variant	KY	ENSGALG00000044975	-1		25:1704584-1706419	3_prime_UTR_variant,intron_variant	ILF2	ENSGALG00000011570	1		ENSGALG00000044841	ENSGALG00000010104
10:11429165-11429566	intron_variant	SH3GL3	ENSGALG00000006045	1		25:1704584-1706419	downstream_gene_variant	ILF2	ENSGALG00000011570	1		ENSGALG00000043576	ENSGALG00000010106
10:20224207-20224837	downstream_gene_variant	PPIP5K1	ENSGALG00000008385	1		25:2344556-2344815	downstream_gene_variant	RPRD2	ENSGALG00000014656	-1		ENSGALG00000031276	ENSGALG00000033770
10:20224207-20224837	downstream_gene_variant	-	ENSGALG00000035587	-1		25:2344556-2344815	coding_sequence_variant,intron_variant	-	ENSGALG00000043416	-1		ENSGALG00000001492	ENSGALG00000044366
11:1715301-1715998	coding_sequence_variant,intron_variant	VAC14	ENSGALG00000002458	1		25:2464995-2465407	intron_variant	PRPF3	ENSGALG00000028205	-1		ENSGALG00000003681	ENSGALG00000045567
11:18873157-18873566	intron_variant	-	ENSGALG00000006222	-1		25:2464995-2465407	downstream_gene_variant	-	ENSGALG00000040103	-1		ENSGALG00000007211	ENSGALG00000039845
11:18873157-18873566	downstream_gene_variant	gga-mir-1560	ENSGALG00000025326	-1		26:653837-654336	intron_variant	CSRP1	ENSGALG00000000318	1		ENSGALG00000002583	ENSGALG00000046562
11:1898474-1899205	intron_variant	GLG1	ENSGALG00000039818	-1		26:653837-654336	coding_sequence_variant,intron_variant	-	ENSGALG00000000362	1		ENSGALG00000018977	ENSGALG00000046191
11:19283284-19283604	coding_sequence_variant,intron_variant	NOB1	ENSGALG00000000693	-1		26:1304953-1305335	coding_sequence_variant,intron_variant	AHCYL1	ENSGALG00000000329	1		ENSGALG00000023708	ENSGALG00000043876
11:19283284-19283604	upstream_gene_variant	WWP2	ENSGALG00000000699	1		26:1304953-1305335	upstream_gene_variant	STRIP1	ENSGALG00000037995	1		ENSGALG00000031894	ENSGALG00000044593
11:19283284-19283604	upstream_gene_variant	NQO1	ENSGALG00000023437	-1		26:2234309-2234577	intron_variant	SLC45A3	ENSGALG00000000703	-1		ENSGALG00000044688	ENSGALG00000044695
11:2046609-2046795	intron_variant	CFDP1	ENSGALG00000002853	-1		26:3554059-3554373	downstream_gene_variant	MOV10	ENSGALG00000001558	1		ENSGALG00000029940	ENSGALG00000044873
11:458045-458502	intron_variant	CSNK2A2	ENSGALG00000031718	1		26:3554059-3554373	intron_variant	RHOC	ENSGALG00000001569	-1		ENSGALG00000025858	ENSGALG00000044753
11:6861582-6862211	intron_variant	ZNF423	ENSGALG00000003891	1		26:3554059-3554373	downstream_gene_variant	PPM1J	ENSGALG00000001605	-1		ENSGALG00000031440	ENSGALG00000044998
11:842120-842223	intron_variant	CCL17	ENSGALG00000024466	1		26:4552857-4553138	downstream_gene_variant	OPN1MSW	ENSGALG00000002848	-1		ENSGALG00000030229	ENSGALG00000043883
11:8478657-8479256	coding_sequence_variant,5_prime_UTR_variant,intron_variant	POP4	ENSGALG00000041972	1		27:1445495-1445812	coding_sequence_variant,intron_variant	EFTUD2	ENSGALG00000000988	-1		ENSGALG00000001425	ENSGALG00000046370
11:8478657-8479256	intron_variant,non_coding_transcript_variant	-	ENSGALG00000030532	-1		27:1491260-1492179	upstream_gene_variant	NMT1	ENSGALG00000000857	1		ENSGALG00000006809	ENSGALG00000033005
12:11592836-11593728	upstream_gene_variant	USP19	ENSGALG00000006824	1		27:1491260-1492179	intron_variant	DCAKD	ENSGALG00000000870	-1		ENSGALG00000040030	ENSGALG00000038176
12:11592836-11593728	coding_sequence_variant,intron_variant	LAMB2	ENSGALG00000006802	1		27:3927403-3928094	intron_variant	IGF2BP1	ENSGALG00000041204	-1		ENSGALG00000028205	ENSGALG00000044861
12:11624391-11624661	upstream_gene_variant	QRICH1	ENSGALG00000006867	1		27:5470270-5470663	downstream_gene_variant	COA3	ENSGALG00000034345	-1		ENSGALG00000028119	ENSGALG00000044728
12:11624391-11624661	downstream_gene_variant	-	ENSGALG00000041419	1		27:5470270-5470663	upstream_gene_variant	CNTD1	ENSGALG00000043285	1		ENSGALG00000042220	ENSGALG00000044277
12:11624391-11624661	downstream_gene_variant	-	ENSGALG00000039385	1		27:5470270-5470663	coding_sequence_variant,intron_variant	WNK4	ENSGALG00000032191	1		ENSGALG00000001480	ENSGALG00000043836
12:11624391-11624661	coding_sequence_variant,intron_variant	QARS	ENSGALG00000029980	1		28:3570280-3571256	intron_variant	NCAN	ENSGALG00000036484	-1		ENSGALG00000034196	ENSGALG00000044676
12:11624391-11624661	upstream_gene_variant	QARS	ENSGALG00000029980	1		Z:90872-91042	intron_variant	-	ENSGALG00000033770	-1		ENSGALG00000035270	ENSGALG00000045308
12:16285798-16286230	intron_variant,non_coding_transcript_variant	-	ENSGALG00000035037	1		Z:12758065-12758243	intergenic_variant	-	-	-		ENSGALG00000041556	ENSGALG00000045118
12:16346113-16346507	upstream_gene_variant	PROK2	ENSGALG00000007785	-1		Z:38633768-38634052	intergenic_variant	-	-	-		ENSGALG00000030847	ENSGALG00000044969
12:16763012-16763444	upstream_gene_variant	PDZRN3	ENSGALG00000007819	-1		Z:67242658-67242821	intron_variant,non_coding_transcript_variant	-	ENSGALG00000044366	-1		ENSGALG00000014387	ENSGALG00000045722
12:2017715-2018261	intron_variant	DOCK3	ENSGALG00000002335	1		Z:67986895-67987116	coding_sequence_variant,intron_variant	-	ENSGALG00000045567	-1		ENSGALG00000032149	ENSGALG00000044785
12:2700293-2700543	downstream_gene_variant	-	ENSGALG00000046133	1		Z:67986895-67987116	upstream_gene_variant	-	ENSGALG00000045567	-1		ENSGALG00000011937	ENSGALG00000005395
12:2700293-2700543	coding_sequence_variant,intron_variant	-	ENSGALG00000046133	1		Z:76469204-76469914	intron_variant,non_coding_transcript_variant	-	ENSGALG00000039845	-1		ENSGALG00000032628	ENSGALG00000028340
12:2904245-2904604	downstream_gene_variant	GRM2	ENSGALG00000003839	1		Z:76469204-76469914	intron_variant,non_coding_transcript_variant	-	ENSGALG00000046562	1		ENSGALG00000028519	ENSGALG00000045952
12:2904245-2904604	coding_sequence_variant,intron_variant	-	ENSGALG00000045878	-1		Z:76469204-76469914	upstream_gene_variant	-	ENSGALG00000046191	1		ENSGALG00000037269
13:11311257-11312053	upstream_gene_variant	THG1L	ENSGALG00000003722	-1		Z:76469204-76469914	intron_variant,non_coding_transcript_variant	-	ENSGALG00000043876	1		ENSGALG00000044063
13:11311257-11312053	coding_sequence_variant,5_prime_UTR_variant,intron_variant	SOX30	ENSGALG00000045860	1		Z:76469204-76469914	intron_variant,non_coding_transcript_variant	-	ENSGALG00000044593	-1		ENSGALG00000037625
13:17011515-17011695	upstream_gene_variant	-	ENSGALG00000006794	1		Z:76469204-76469914	intron_variant,non_coding_transcript_variant	-	ENSGALG00000044695	1		ENSGALG00000021679
13:17625433-17625573	intergenic_variant	-	-	-		Z:76469204-76469914	intron_variant,non_coding_transcript_variant	-	ENSGALG00000044873	-1		ENSGALG00000036346
13:18395360-18395963	intergenic_variant	-	-	-		Z:77152927-77153827	intron_variant,non_coding_transcript_variant	-	ENSGALG00000044753	-1		ENSGALG00000043925
13:8270133-8270880	intron_variant	HTR4	ENSGALG00000001383	-1		Z:77152927-77153827	intron_variant,non_coding_transcript_variant	-	ENSGALG00000044998	1		ENSGALG00000000843
14:12719525-12720003	intron_variant	SRL	ENSGALG00000038884	-1		Z:77152927-77153827	intron_variant,non_coding_transcript_variant	-	ENSGALG00000043883	1		ENSGALG00000000996
14:12719525-12720003	upstream_gene_variant	SRL	ENSGALG00000038884	-1		Z:77152927-77153827	intron_variant,non_coding_transcript_variant	-	ENSGALG00000046370	-1		ENSGALG00000026055
14:12779201-12779596	intron_variant	CORO7	ENSGALG00000038325	-1		Z:78133515-78134278	intron_variant,non_coding_transcript_variant	-	ENSGALG00000033005	1		ENSGALG00000002029
14:12779201-12779596	intron_variant	DNAJA3	ENSGALG00000007821	1		Z:78133515-78134278	intron_variant,non_coding_transcript_variant	-	ENSGALG00000038176	1		ENSGALG00000002453
14:13126569-13126900	upstream_gene_variant	CFAP70	ENSGALG00000002551	1		Z:78133515-78134278	upstream_gene_variant	-	ENSGALG00000044861	1		ENSGALG00000026711
14:13126569-13126900	coding_sequence_variant,3_prime_UTR_variant	MSS51	ENSGALG00000002597	-1		Z:78133515-78134278	intron_variant,non_coding_transcript_variant	-	ENSGALG00000044728	-1		ENSGALG00000024298
14:13126569-13126900	downstream_gene_variant	-	ENSGALG00000002610	1		Z:78133515-78134278	intron_variant,non_coding_transcript_variant	-	ENSGALG00000044277	1		ENSGALG00000041934
14:13336939-13337910	upstream_gene_variant	-	ENSGALG00000002201	-1		Z:78133515-78134278	downstream_gene_variant	-	ENSGALG00000044728	-1		ENSGALG00000027749
14:3210577-3211245	intergenic_variant	-	-	-		Z:78450490-78451404	intron_variant,non_coding_transcript_variant	-	ENSGALG00000038176	1		ENSGALG00000032259
14:3957305-3957621	upstream_gene_variant	FOXK1	ENSGALG00000004460	1		Z:78450490-78451404	intron_variant,non_coding_transcript_variant	-	ENSGALG00000043836	1		ENSGALG00000010169
14:4049807-4050265	coding_sequence_variant,intron_variant	MMD2	ENSGALG00000004530	-1		Z:78450490-78451404	intron_variant,non_coding_transcript_variant	-	ENSGALG00000044676	1		ENSGALG00000035021
14:4052346-4052884	intron_variant	MMD2	ENSGALG00000004530	-1		Z:80246988-80247339	upstream_gene_variant	-	ENSGALG00000045308	1		ENSGALG00000011621
14:4134484-4134909	coding_sequence_variant	TNRC18	ENSGALG00000040770	-1		Z:80246988-80247339	intron_variant,non_coding_transcript_variant	-	ENSGALG00000045118	-1		ENSGALG00000012364
14:4134484-4134909	start_lost,start_retained_variant,coding_sequence_variant,5_prime_UTR_variant	TNRC18	ENSGALG00000040770	-1		Z:80246988-80247339	intron_variant,non_coding_transcript_variant	-	ENSGALG00000045308	1		ENSGALG00000012370
14:6911375-6911918	downstream_gene_variant	TNRC6A	ENSGALG00000006068	1		Z:80246988-80247339	intron_variant,non_coding_transcript_variant	-	ENSGALG00000044969	1		ENSGALG00000016443
14:6911375-6911918	downstream_gene_variant	-	ENSGALG00000035918	-1		Z:80344461-80344858	intron_variant,non_coding_transcript_variant	-	ENSGALG00000045722	-1		ENSGALG00000004475
15:11350248-11350403	intergenic_variant	-	-	-		Z:80344461-80344858	intron_variant,non_coding_transcript_variant	-	ENSGALG00000045308	1		ENSGALG00000004401
15:1593971-1594477	intron_variant	FBRSL1	ENSGALG00000002205	-1		Z:80344461-80344858	intron_variant,non_coding_transcript_variant	-	ENSGALG00000044785	1		ENSGALG00000028208
15:4610710-4611027	intergenic_variant	-	-	-		Z:81611745-81613119	downstream_gene_variant	POLR1E	ENSGALG00000005395	-1		ENSGALG00000044385
15:4702712-4703685	intron_variant	NCOR2	ENSGALG00000003120	1		Z:81611745-81613119	upstream_gene_variant	-	ENSGALG00000028340	-1		ENSGALG00000006190
15:7220702-7221225	5_prime_UTR_variant,intron_variant	TPST2	ENSGALG00000005626	-1		Z:82240604-82240942	downstream_gene_variant	-	ENSGALG00000045952	-1		ENSGALG00000008326
15:7220702-7221225	downstream_gene_variant	CRYBB1	ENSGALG00000005630	-1								ENSGALG00000039942
15:7220702-7221225	upstream_gene_variant	TFIP11	ENSGALG00000005623	-1								ENSGALG00000040247
15:8003050-8004572	upstream_gene_variant	VPS29L	ENSGALG00000005951	-1								ENSGALG00000034939
15:8003050-8004572	coding_sequence_variant,5_prime_UTR_variant,3_prime_UTR_variant,intron_variant	VPREB3	ENSGALG00000021136	-1								ENSGALG00000010304
15:8003050-8004572	downstream_gene_variant	-	ENSGALG00000044503	-1								ENSGALG00000010309
17:3920643-3921005	intron_variant	ASTN2	ENSGALG00000007038	-1								ENSGALG00000010307
17:6506046-6506218	downstream_gene_variant	FIBCD1	ENSGALG00000003866	-1								ENSGALG00000024525
17:9251100-9251316	upstream_gene_variant	PTGS1	ENSGALG00000001314	1								ENSGALG00000041512
17:9251100-9251316	intron_variant	PTGS1	ENSGALG00000001314	1								ENSGALG00000040971
18:10291115-10291837	coding_sequence_variant,intron_variant	CACNA1G	ENSGALG00000007623	-1								ENSGALG00000041387
18:10921933-10922219	coding_sequence_variant,intron_variant	TMEM94	ENSGALG00000008023	1								ENSGALG00000039219
18:2038681-2038864	intron_variant	PIK3R5	ENSGALG00000026167	-1								ENSGALG00000005007
18:2153236-2153456	intron_variant	STX8	ENSGALG00000001238	-1								ENSGALG00000005017
18:8049205-8049358	upstream_gene_variant	ABCA5	ENSGALG00000004333	-1								ENSGALG00000042551
18:8049205-8049358	upstream_gene_variant	MAP2K6	ENSGALG00000004370	1								ENSGALG00000038513
18:9839718-9840442	coding_sequence_variant,intron_variant	ENGASE	ENSGALG00000011816	-1								ENSGALG00000007572
18:9839718-9840442	downstream_gene_variant	RBFOX3	ENSGALG00000032889	1								ENSGALG00000007592
19:4087762-4087853	upstream_gene_variant	SH2B2	ENSGALG00000001828	1								ENSGALG00000039917
19:4087762-4087853	intron_variant,non_coding_transcript_variant	-	ENSGALG00000030792	1								ENSGALG00000030925
19:5385492-5386041	coding_sequence_variant	WDR81	ENSGALG00000026822	1								ENSGALG00000009718
19:5731196-5731731	upstream_gene_variant	UNC119	ENSGALG00000003657	-1								ENSGALG00000020615
19:5731196-5731731	downstream_gene_variant	PIGS	ENSGALG00000003665	-1								ENSGALG00000011326
19:5949409-5949829	intron_variant	MYO18A	ENSGALG00000003741	-1								ENSGALG00000011328
19:5949409-5949829	start_lost,start_retained_variant,coding_sequence_variant,5_prime_UTR_variant	MYO18A	ENSGALG00000003741	-1								ENSGALG00000011332
19:7271086-7271555	upstream_gene_variant	DHX40	ENSGALG00000005126	1								ENSGALG00000000433
19:7346212-7346509	intron_variant	VMP1	ENSGALG00000005160	1								ENSGALG00000011650
19:9618113-9618307	intron_variant	-	ENSGALG00000044841	-1								ENSGALG00000011652
20:10885050-10886486	coding_sequence_variant,5_prime_UTR_variant,intron_variant	CDH22	ENSGALG00000007211	-1								ENSGALG00000026227
20:4972880-4973268	intron_variant	TOP1	ENSGALG00000003681	1								ENSGALG00000037301
20:875735-875953	intron_variant	NDRG3	ENSGALG00000001492	1								ENSGALG00000003424
21:3023208-3023616	intergenic_variant	-	-	-								ENSGALG00000010569
21:3449099-3449393	intron_variant	PIK3CD	ENSGALG00000002583	1								ENSGALG00000010570
21:4843634-4843923	upstream_gene_variant	PLA2G5	ENSGALG00000018977	-1								ENSGALG00000027565
21:4843634-4843923	upstream_gene_variant	UBXN10	ENSGALG00000023708	1								ENSGALG00000044975
21:4843634-4843923	3_prime_UTR_variant	PLA2G2A	ENSGALG00000031894	-1								ENSGALG00000007253
21:4843634-4843923	upstream_gene_variant	-	ENSGALG00000044688	-1								ENSGALG00000007478
21:5208210-5208369	intergenic_variant	-	-	-								ENSGALG00000040815
22:2585262-2586124	intergenic_variant	-	-	-								ENSGALG00000045593
22:4617267-4617951	coding_sequence_variant,intron_variant	IL1B	ENSGALG00000029940	-1								ENSGALG00000023531
23:1685577-1685875	intron_variant	LUZP1	ENSGALG00000025858	1								ENSGALG00000032147
23:2800414-2800754	intron_variant	PTPRU	ENSGALG00000031440	1								ENSGALG00000036815
23:4825042-4825507	intron_variant	CSMD2	ENSGALG00000030229	1								ENSGALG00000034906
23:5065416-5065771	intergenic_variant	-	-	-								ENSGALG00000045761
24:1785529-1786037	intron_variant	SNX19	ENSGALG00000001425	-1								ENSGALG00000045086
24:4322430-4322801	intron_variant	POU2AF1	ENSGALG00000006809	-1								ENSGALG00000045224
24:5677573-5678402	coding_sequence_variant,intron_variant	PHLDB1	ENSGALG00000040030	-1								ENSGALG00000046492
24:5677573-5678402	upstream_gene_variant	PHLDB1	ENSGALG00000040030	-1								ENSGALG00000001668
25:2640725-2640866	intron_variant	PRPF3	ENSGALG00000028205	-1								ENSGALG00000027418
25:2640725-2640866	downstream_gene_variant	CDC42SE1	ENSGALG00000028119	-1								ENSGALG00000027630
25:2640725-2640866	coding_sequence_variant,intron_variant	PRUNE1	ENSGALG00000042220	1								ENSGALG00000014999
26:3262316-3263255	downstream_gene_variant	-	ENSGALG00000001480	-1								ENSGALG00000015118
26:3503865-3504012	coding_sequence_variant,intron_variant	WNT2B	ENSGALG00000034196	1								ENSGALG00000044128
26:3503865-3504012	upstream_gene_variant	-	ENSGALG00000035270	-1								ENSGALG00000046628
27:1677849-1678721	upstream_gene_variant	GPATCH8	ENSGALG00000041556	1								ENSGALG00000045963
27:1677849-1678721	upstream_gene_variant	FZD2	ENSGALG00000030847	-1								ENSGALG00000045918
27:3448808-3448885	intergenic_variant	-	-	-								ENSGALG00000044109
27:4235682-4235757	downstream_gene_variant	MRPL10	ENSGALG00000014387	1								ENSGALG00000046459
27:4235682-4235757	coding_sequence_variant	OSBPL7	ENSGALG00000032149	1								ENSGALG00000046068
27:4235682-4235757	intron_variant	NFE2L1	ENSGALG00000011937	-1								ENSGALG00000046039
27:4333186-4333566	upstream_gene_variant	SRCIN1	ENSGALG00000032628	-1								ENSGALG00000045299
27:5419645-5419925	downstream_gene_variant	CCR10	ENSGALG00000028519	-1								ENSGALG00000045877
27:5419645-5419925	intron_variant	PLEKHH3	ENSGALG00000037269	-1								ENSGALG00000044681
27:5419645-5419925	downstream_gene_variant	-	ENSGALG00000044063	1								ENSGALG00000044292
28:2019439-2020189	downstream_gene_variant	SF3A2	ENSGALG00000021679	-1								ENSGALG00000045149
28:2019439-2020189	coding_sequence_variant,3_prime_UTR_variant	AMH	ENSGALG00000036346	-1								ENSGALG00000044881
28:2019439-2020189	downstream_gene_variant	-	ENSGALG00000043925	1								ENSGALG00000045069
28:2093082-2093153	intron_variant	DOT1L	ENSGALG00000000843	-1								ENSGALG00000045437
28:2093082-2093153	upstream_gene_variant	-	ENSGALG00000000996	1
28:2787354-2788097	coding_sequence_variant,intron_variant	PALM	ENSGALG00000026055	1
28:2929087-2929337	upstream_gene_variant	TMEM259	ENSGALG00000002029	-1
28:2929087-2929337	coding_sequence_variant,intron_variant	-	ENSGALG00000002453	-1
28:2929087-2929337	downstream_gene_variant	RF00026	ENSGALG00000026711	1
28:2929087-2929337	downstream_gene_variant	-	ENSGALG00000002453	-1
28:3263298-3263412	upstream_gene_variant	ADAMTSL5	ENSGALG00000024298	-1
28:3263298-3263412	downstream_gene_variant	THOP1	ENSGALG00000041934	-1
28:368191-369189	coding_sequence_variant,intron_variant	FBN3	ENSGALG00000037625	1
W:4067174-4067369	intron_variant,non_coding_transcript_variant	-	ENSGALG00000036815	-1
W:4067174-4067369	intron_variant,non_coding_transcript_variant	-	ENSGALG00000034906	1
W:4067174-4067369	intron_variant,non_coding_transcript_variant	-	ENSGALG00000045761	1
W:4067174-4067369	intron_variant,non_coding_transcript_variant	-	ENSGALG00000045086	-1
W:4067174-4067369	intron_variant,non_coding_transcript_variant	-	ENSGALG00000045224	-1
W:4067174-4067369	intron_variant,non_coding_transcript_variant	-	ENSGALG00000046492	-1
Z:25392775-25392950	upstream_gene_variant	-	ENSGALG00000014999	-1
Z:34995708-34996201	intron_variant	SMC5	ENSGALG00000015118	1
Z:48033895-48034046	intergenic_variant	-	-	-
Z:54997864-54998775	intergenic_variant	-	-	-
Z:66132335-66132809	upstream_gene_variant	-	ENSGALG00000044128	1
Z:66132335-66132809	downstream_gene_variant	-	ENSGALG00000046628	1
Z:66146972-66147169	downstream_gene_variant	-	ENSGALG00000045963	1
Z:7337092-7337617	intron_variant	UBE2R2	ENSGALG00000001668	1
Z:74098690-74098994	intron_variant,non_coding_transcript_variant	-	ENSGALG00000045918	-1
Z:74098690-74098994	intron_variant,non_coding_transcript_variant	-	ENSGALG00000044109	1
Z:74098690-74098994	downstream_gene_variant	-	ENSGALG00000046459	-1
Z:74371028-74371333	downstream_gene_variant	-	ENSGALG00000046068	-1
Z:74371028-74371333	intron_variant,non_coding_transcript_variant	-	ENSGALG00000046039	1
Z:74371028-74371333	intron_variant,non_coding_transcript_variant	-	ENSGALG00000045299	1
Z:74371028-74371333	intron_variant,non_coding_transcript_variant	-	ENSGALG00000045877	1
Z:74371028-74371333	intron_variant,non_coding_transcript_variant	-	ENSGALG00000044681	1
Z:74371028-74371333	non_coding_transcript_exon_variant,intron_variant	-	ENSGALG00000044292	-1
Z:74371028-74371333	intron_variant,non_coding_transcript_variant	-	ENSGALG00000044292	-1
Z:74371028-74371333	intron_variant,non_coding_transcript_variant	-	ENSGALG00000044109	1
Z:74371028-74371333	intron_variant,non_coding_transcript_variant	-	ENSGALG00000045149	1
Z:80580654-80581146	intron_variant,non_coding_transcript_variant	-	ENSGALG00000044881	-1
Z:80580654-80581146	non_coding_transcript_exon_variant	-	ENSGALG00000045069	1
Z:80580654-80581146	intron_variant,non_coding_transcript_variant	-	ENSGALG00000045437	1
Z:9097671-9097770	downstream_gene_variant	HINT2	ENSGALG00000027418	1
Z:9097671-9097770	3_prime_UTR_variant	NPR2	ENSGALG00000027630	-1
